# Supplementary material for: Topologically diverse polycyclic aromatic hydrocarbons from pericyclic reactions with polyaromatic phospholes
Source: Royal Society of Chemistry journal article supplement (doi:10.1039/d1nj01194d), 2021-01-01
Supplement: d1nj01194d1.pdf [file d1nj01194d1.pdf]

## New Journal of Chemistry

### Supporting Informations for:

# Topologically diverse Polycyclic Aromatic Hydrocarbons from Pericyclic Reactions with Polyaromatic Phospholes

Réka Mokrai,<sup>†,‡,§</sup> Rózsa Szűcs,<sup>†,‡</sup> Matthew P. Duffy,<sup>†</sup> Vincent Dorcet,<sup>†</sup> Thierry Roisnel,<sup>†</sup>  
Zoltán Benkő,<sup>\*,‡</sup> László Nyulászi,<sup>\*,‡,§</sup> Pierre-Antoine Bouit<sup>\*,†</sup> and Muriel Hissler<sup>\*,†</sup>

## Table of Content

|                                     |                  |
|-------------------------------------|------------------|
| <b>NMR Spectra</b>                  | <b>page S2</b>   |
| <b>X-ray Crystallographic Study</b> | <b>page S16</b>  |
| <b>Optical and redox properties</b> | <b>page S22</b>  |
| <b>Theoretical investigations</b>   | <b>page S27</b>  |
| <b>Thermal properties</b>           | <b>page S103</b> |

**Figure S1.**  $^1\text{H}$  NMR (400 MHz,  $\text{CD}_2\text{Cl}_2$ ),  $^{13}\text{C}\{^1\text{H}\}$  NMR (100 MHz,  $\text{CD}_2\text{Cl}_2$ ) and  $^{31}\text{P}\{^1\text{H}\}\{^{13}\text{C}\}$  NMR of **1**.

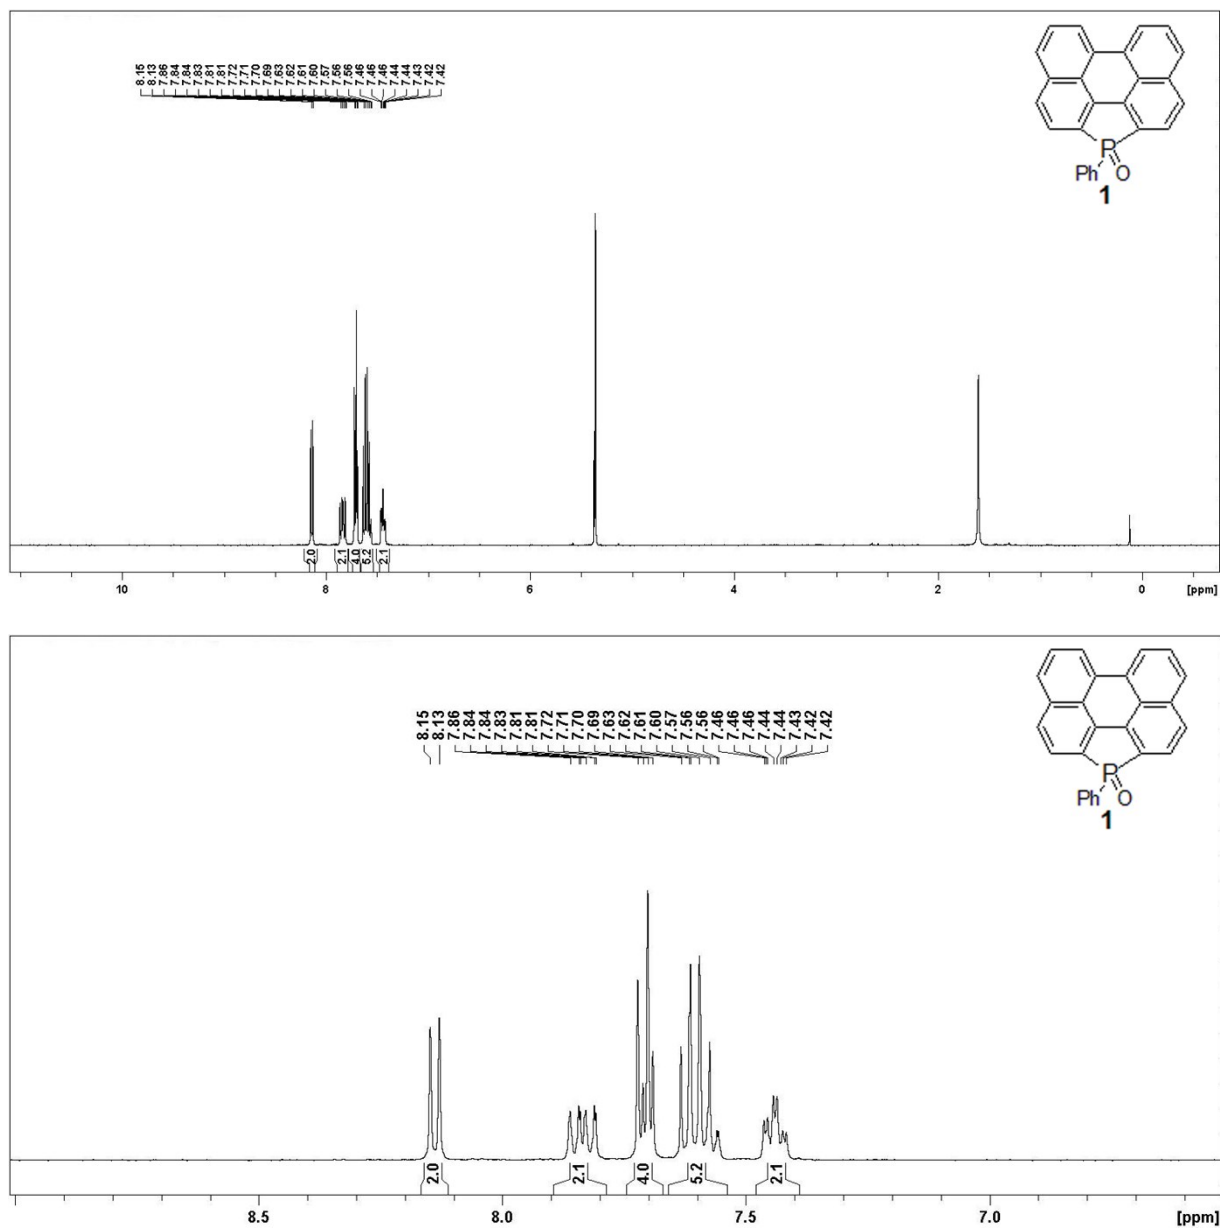

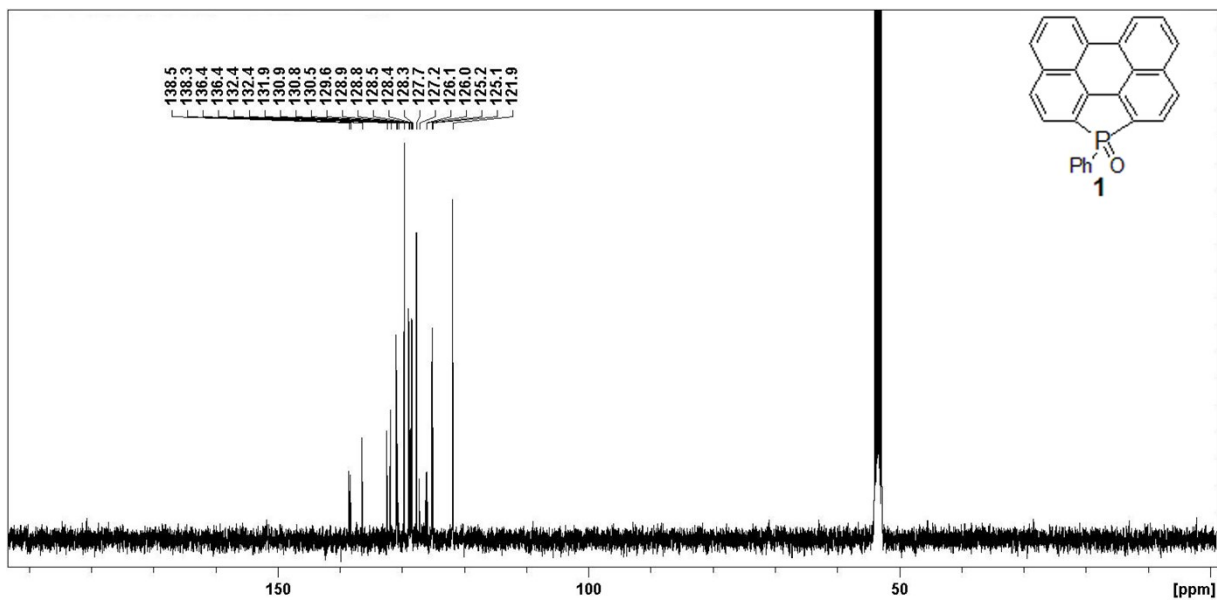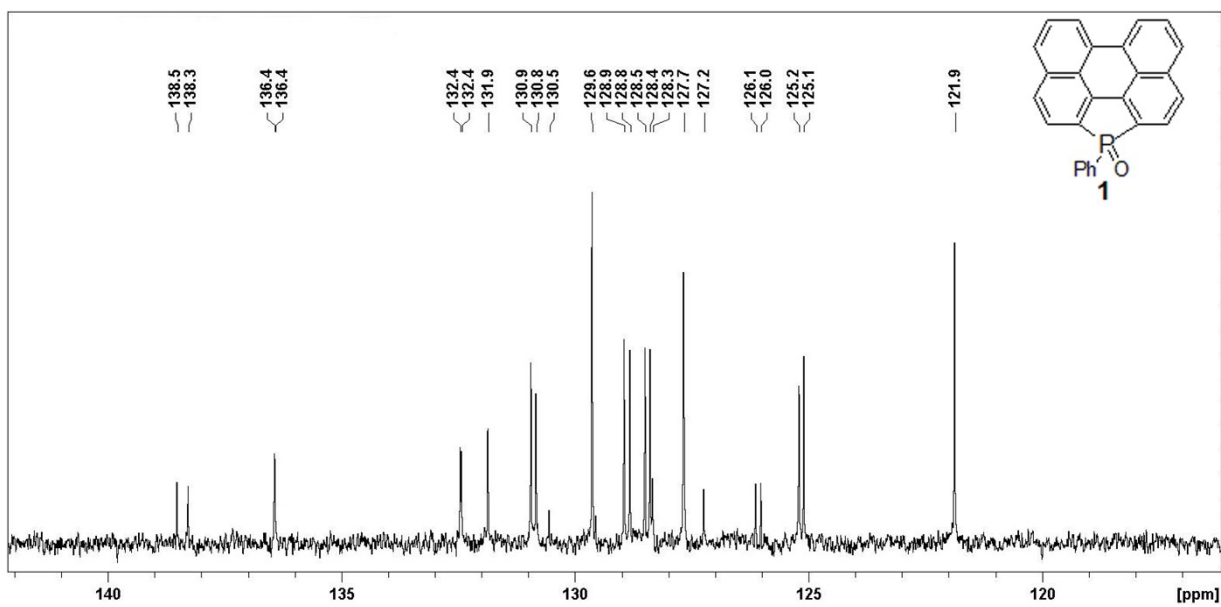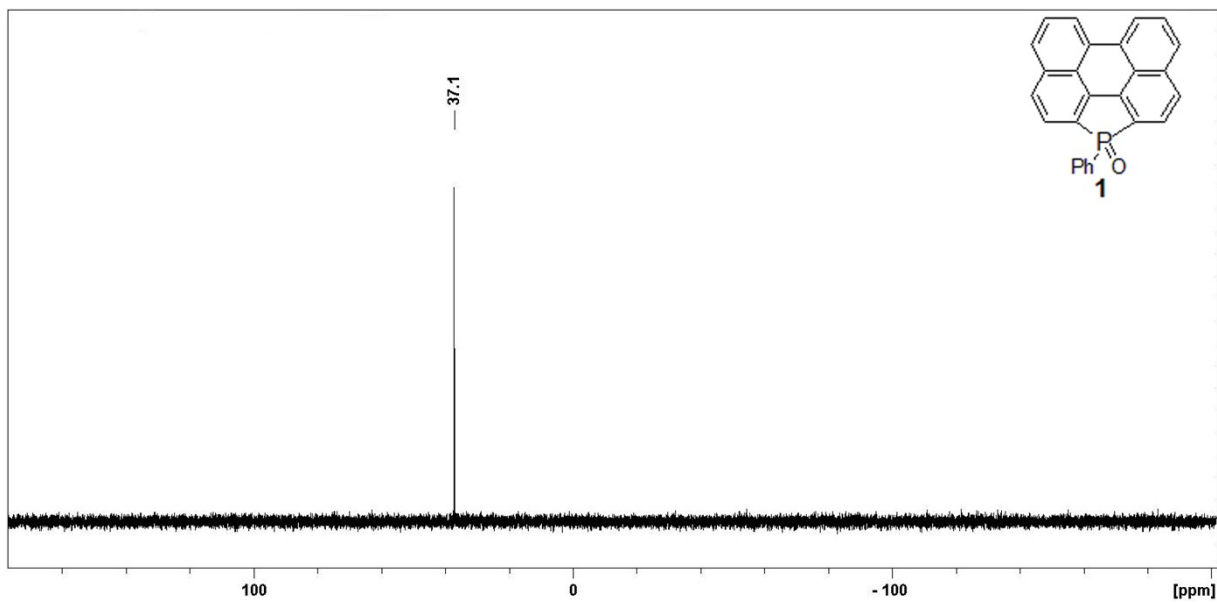

**Figure S2.**  $^1\text{H}$  NMR (300 MHz,  $\text{CD}_2\text{Cl}_2$ ) and  $^{13}\text{C}\{^1\text{H}\}$  NMR (75 MHz,  $\text{CD}_2\text{Cl}_2$ ) of **2**.

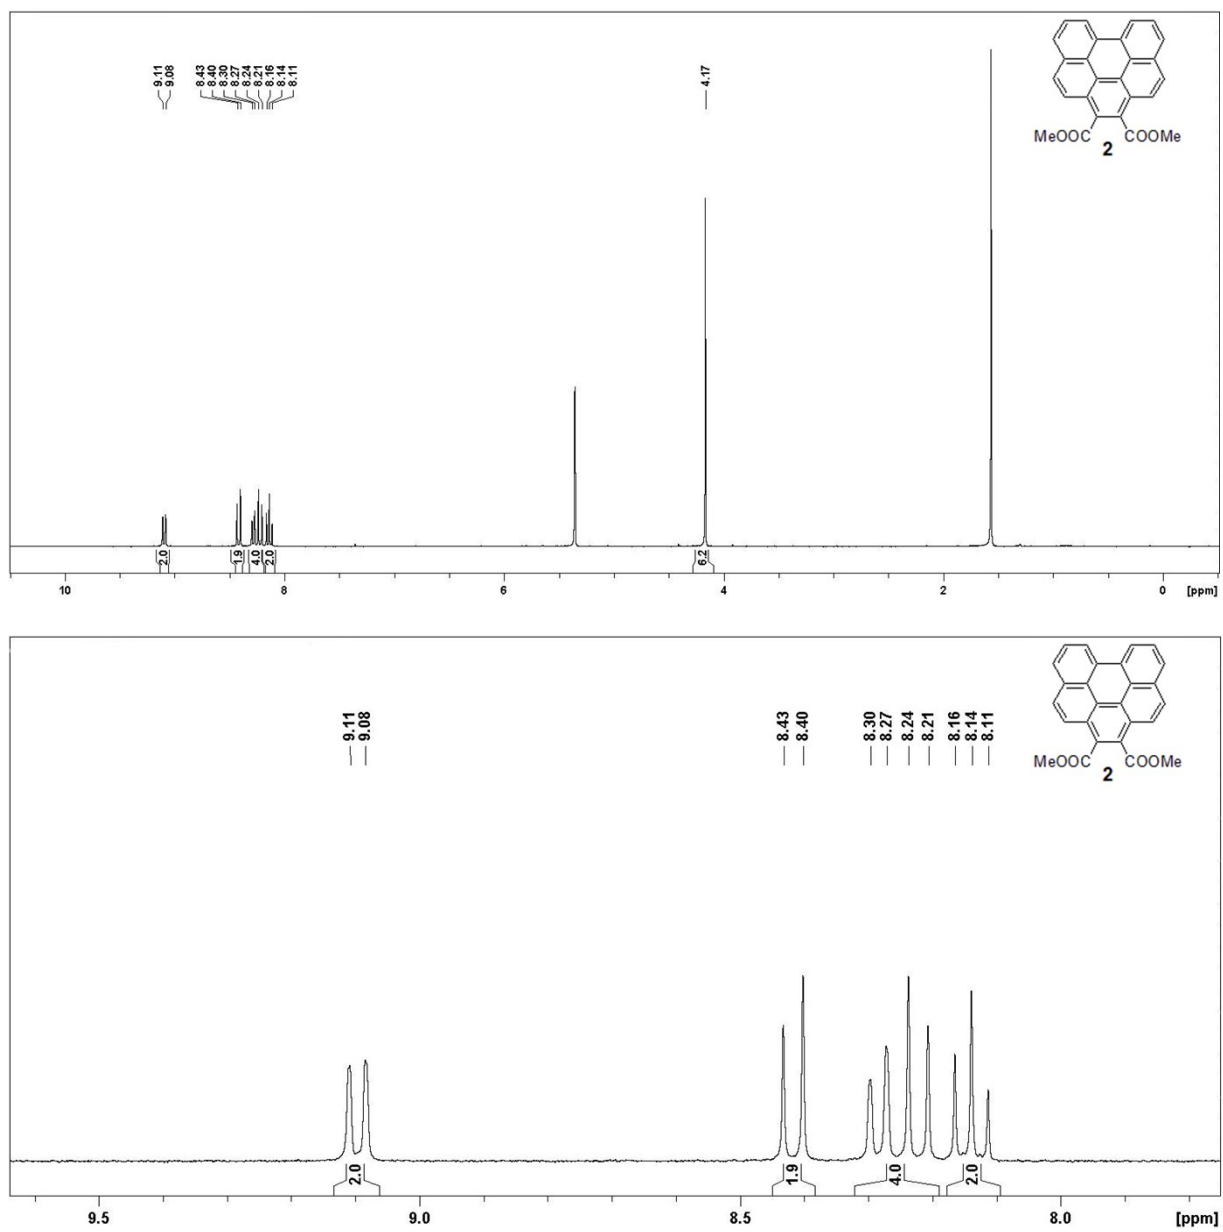

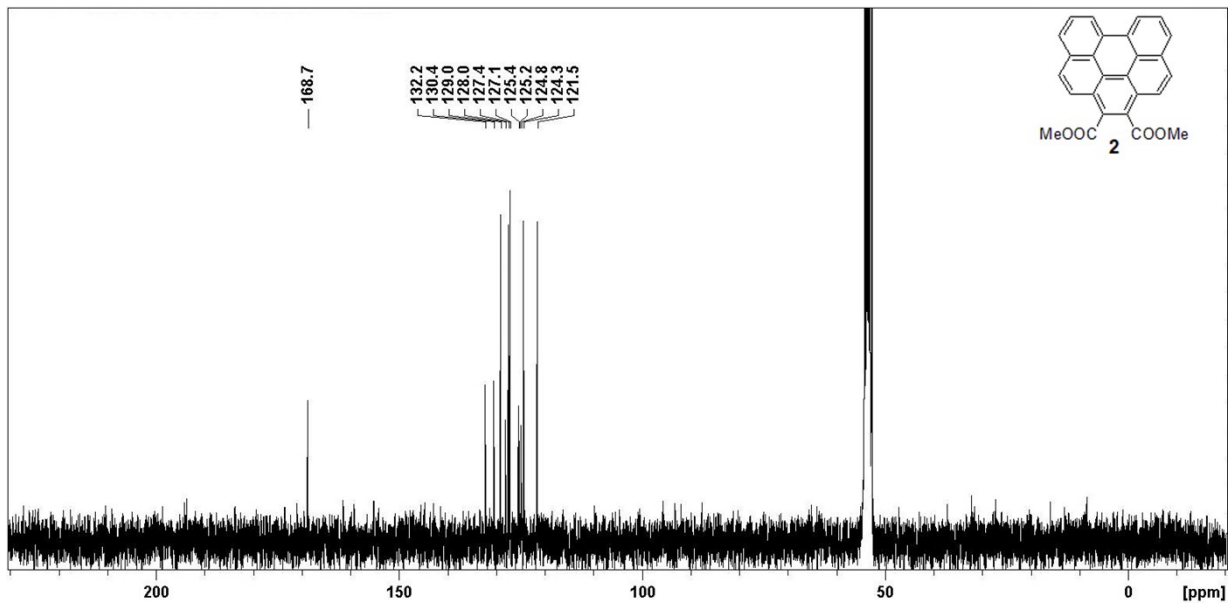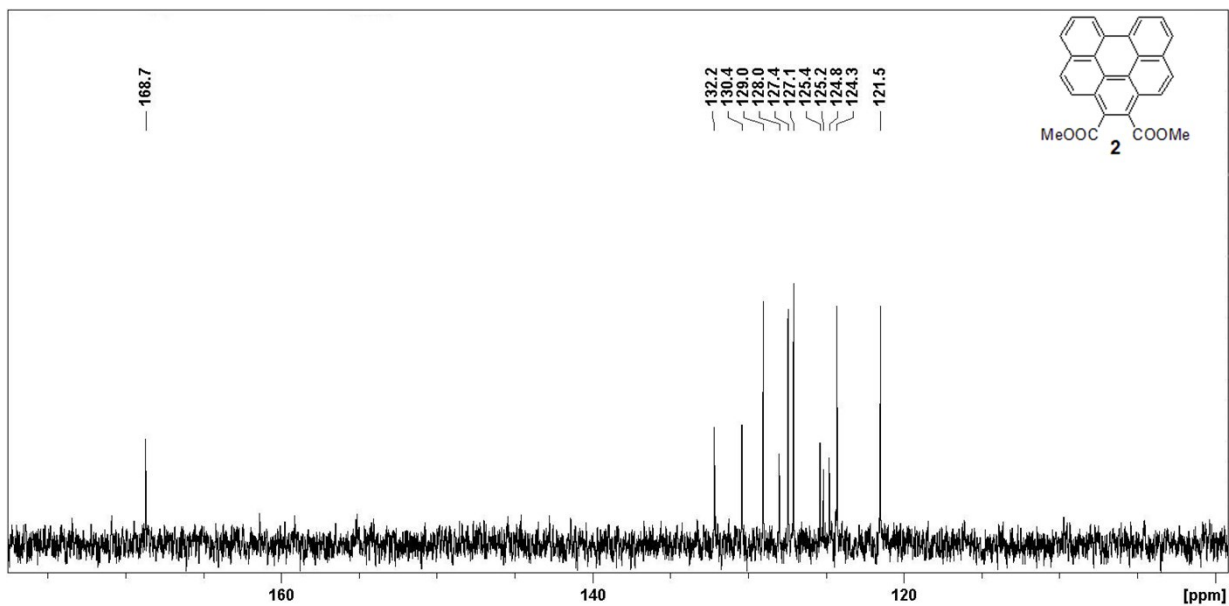

**Figure S3.**  $^1\text{H}$  NMR (400 MHz,  $\text{CD}_2\text{Cl}_2$ ) and  $^{13}\text{C}\{^1\text{H}\}$  NMR (100 MHz,  $\text{CD}_2\text{Cl}_2$ ) of **6**.

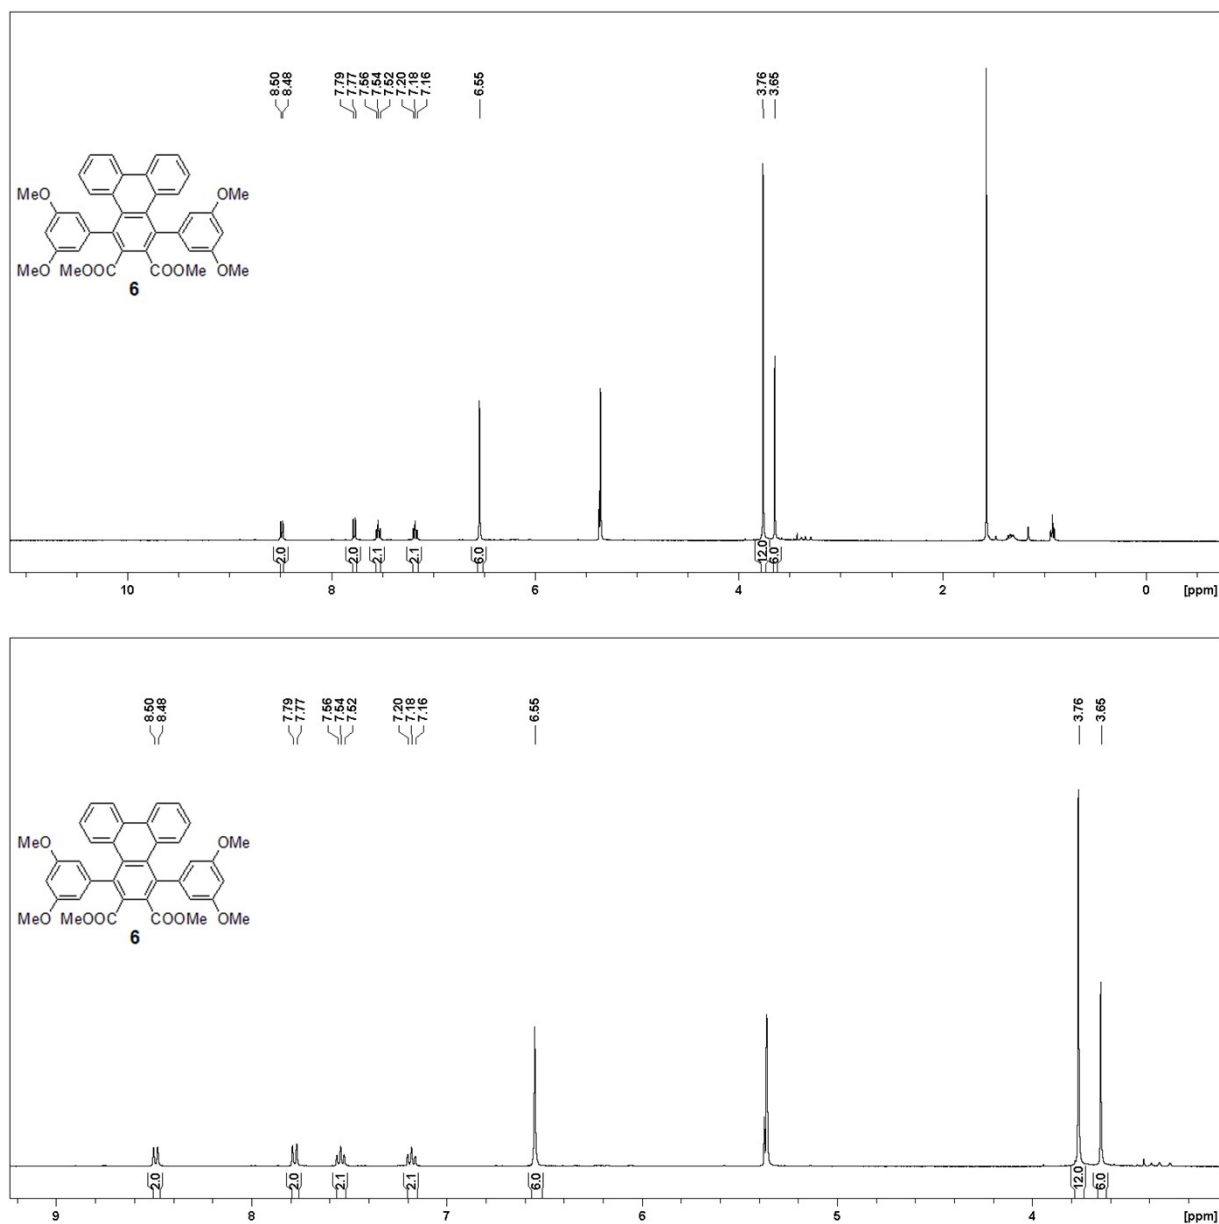

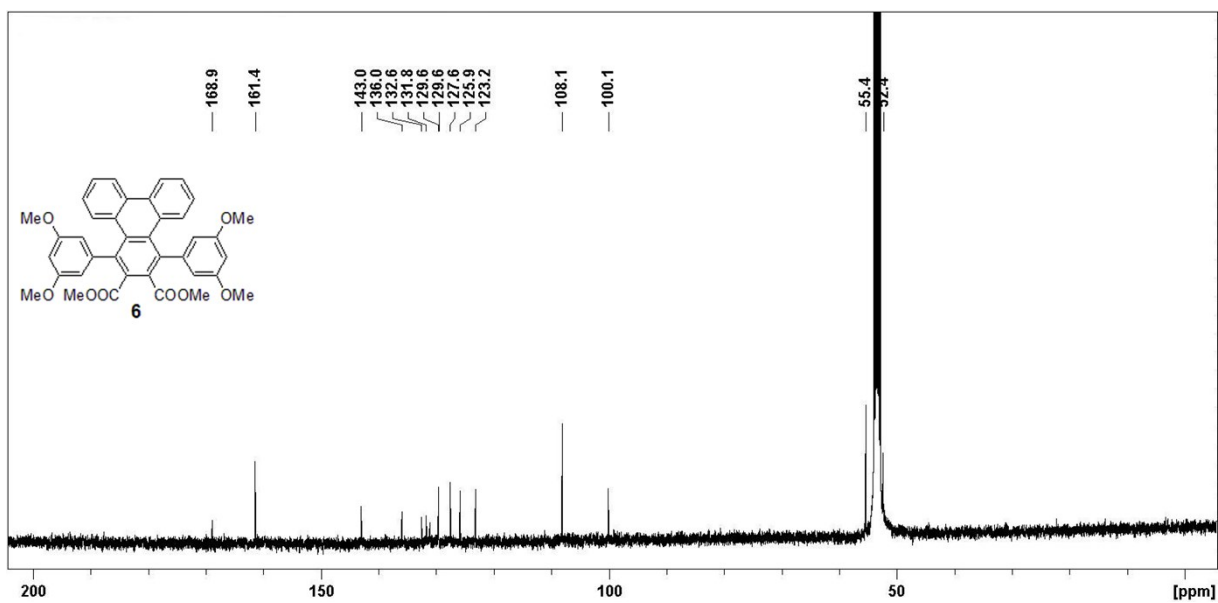

**Figure S4.**  $^1\text{H}$  NMR (300 MHz,  $\text{CDCl}_3$ ) and  $^{13}\text{C}\{^1\text{H}\}$  NMR (75 MHz,  $\text{CDCl}_3$ ) of **7**.

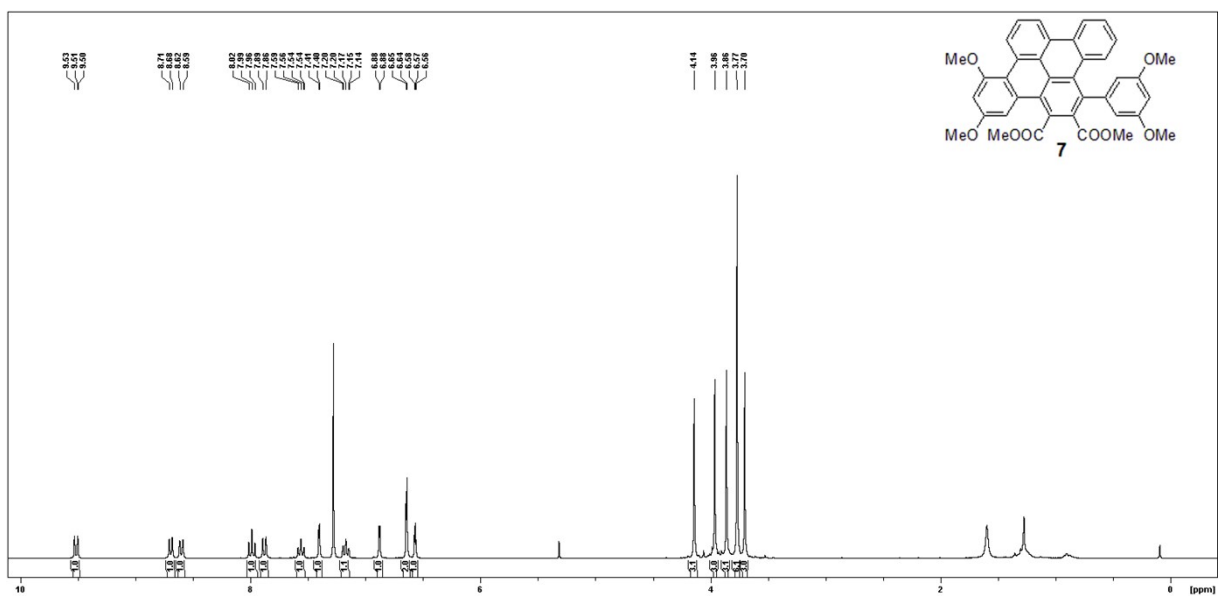

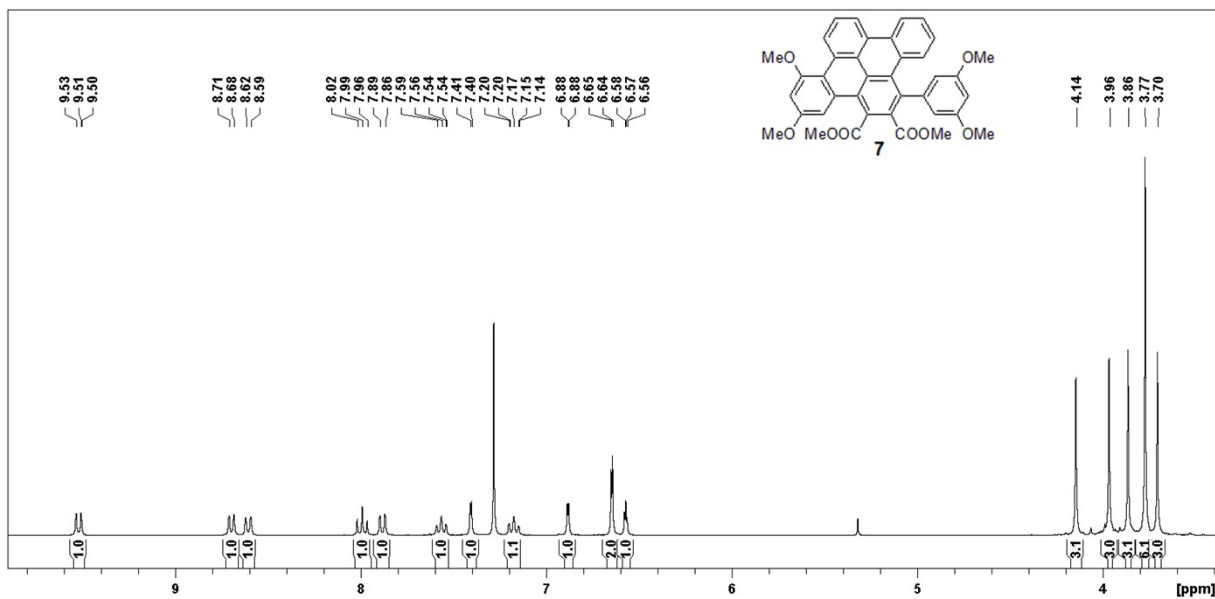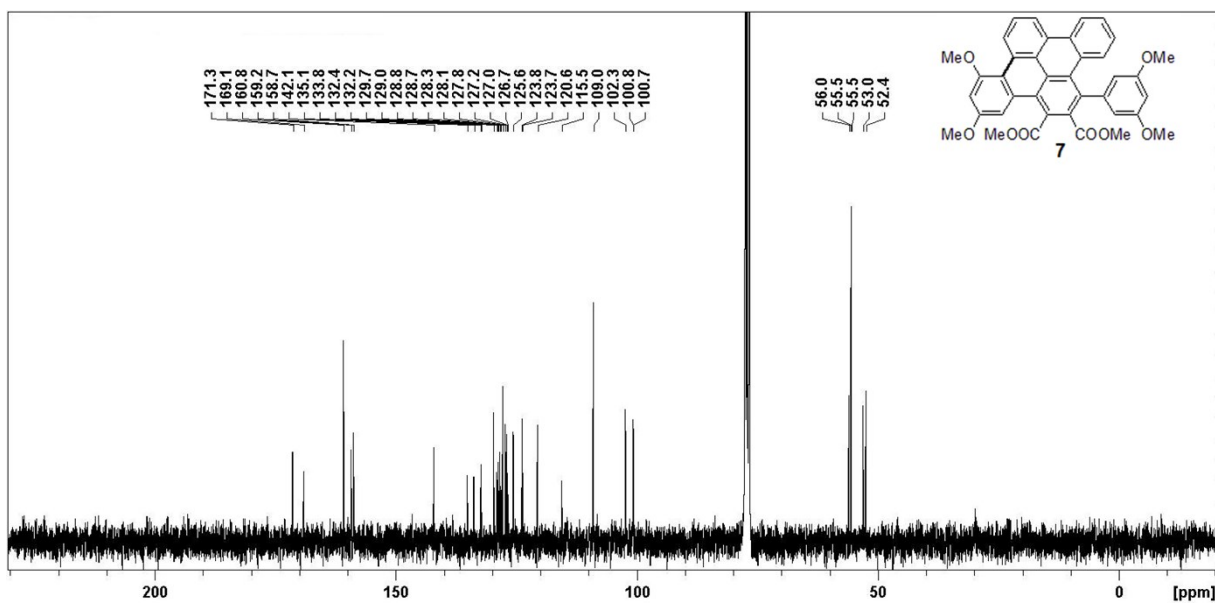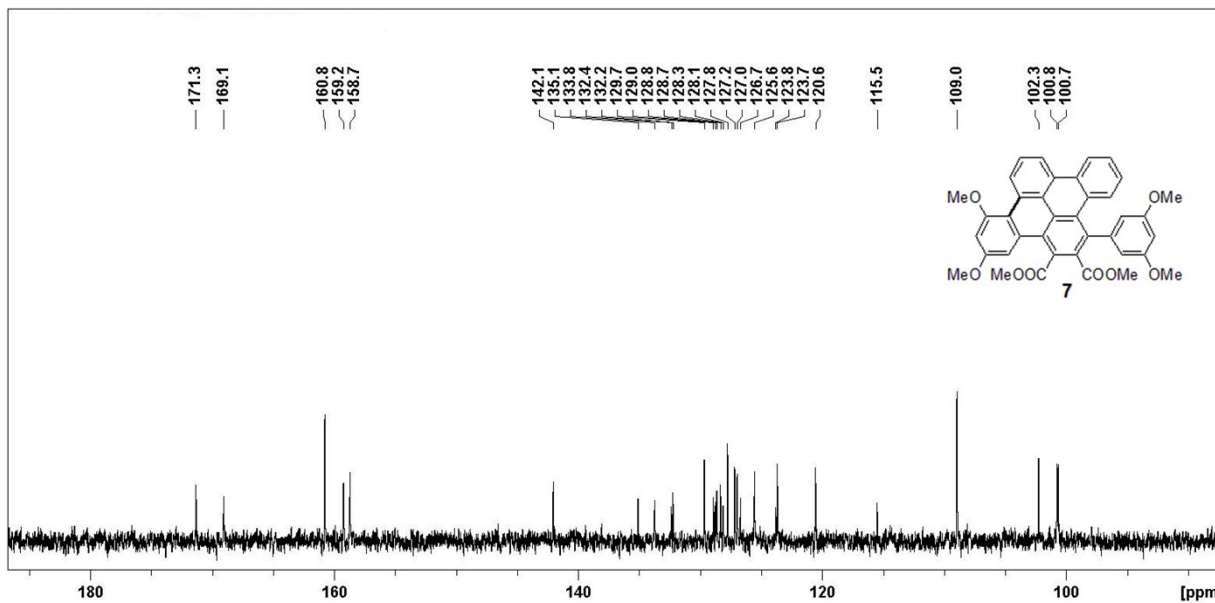



**Figure S5.**  $^1\text{H}$  NMR (400 MHz,  $\text{CD}_2\text{Cl}_2$ ) and  $^{13}\text{C}\{^1\text{H}\}$  NMR (100 MHz,  $\text{CD}_2\text{Cl}_2$ ) of **8**.

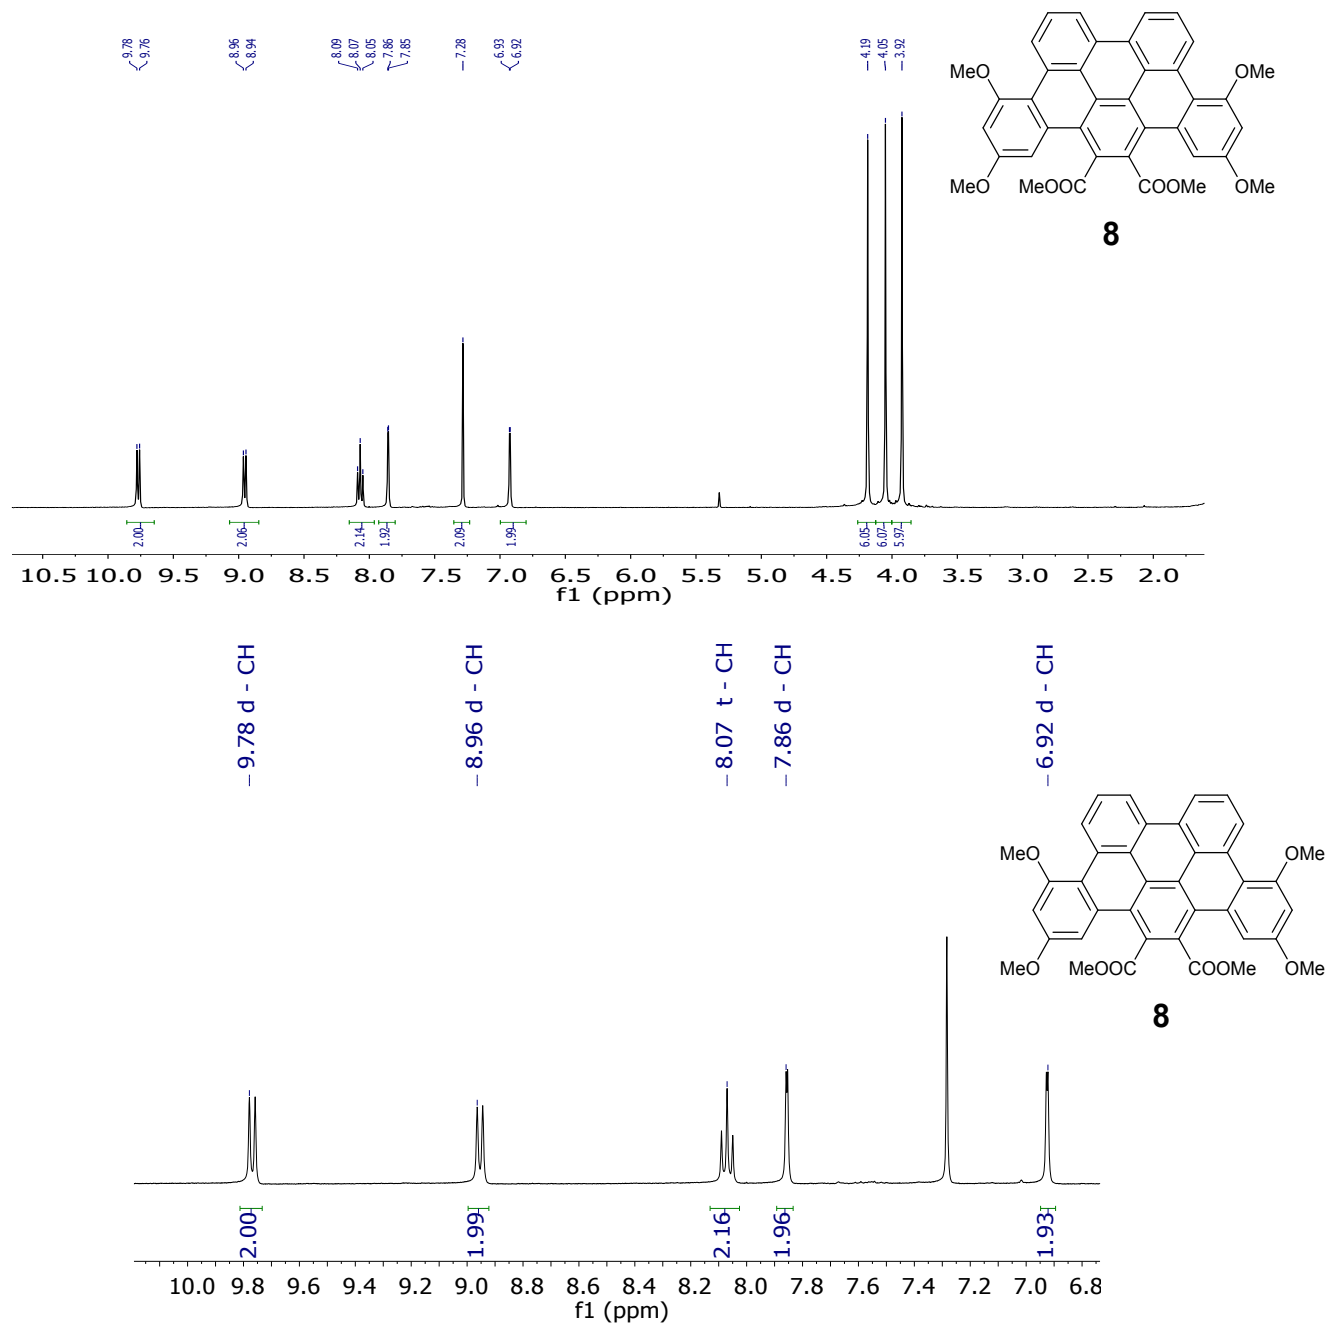

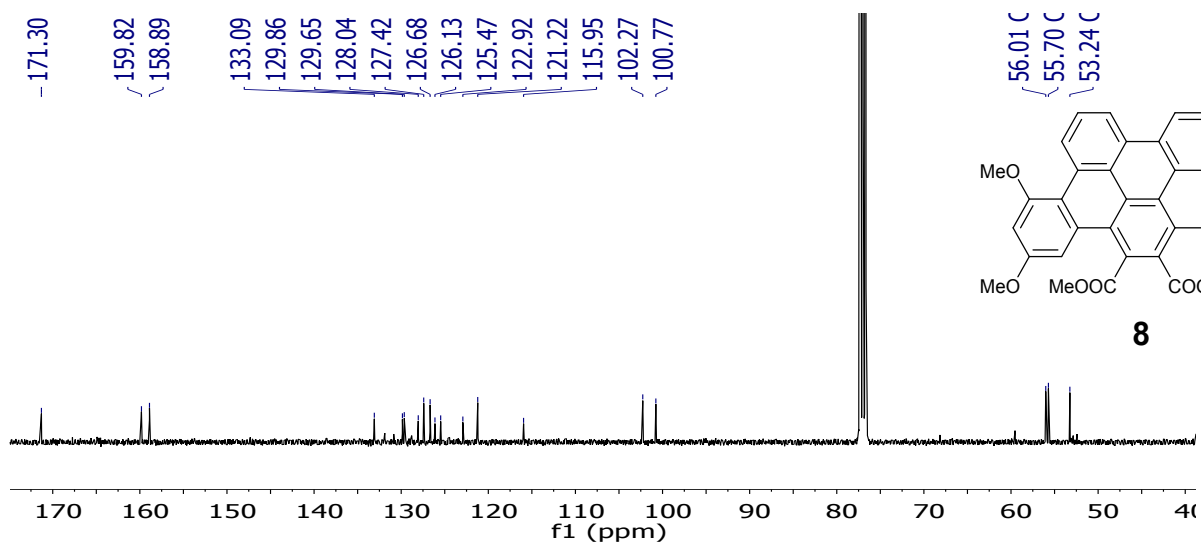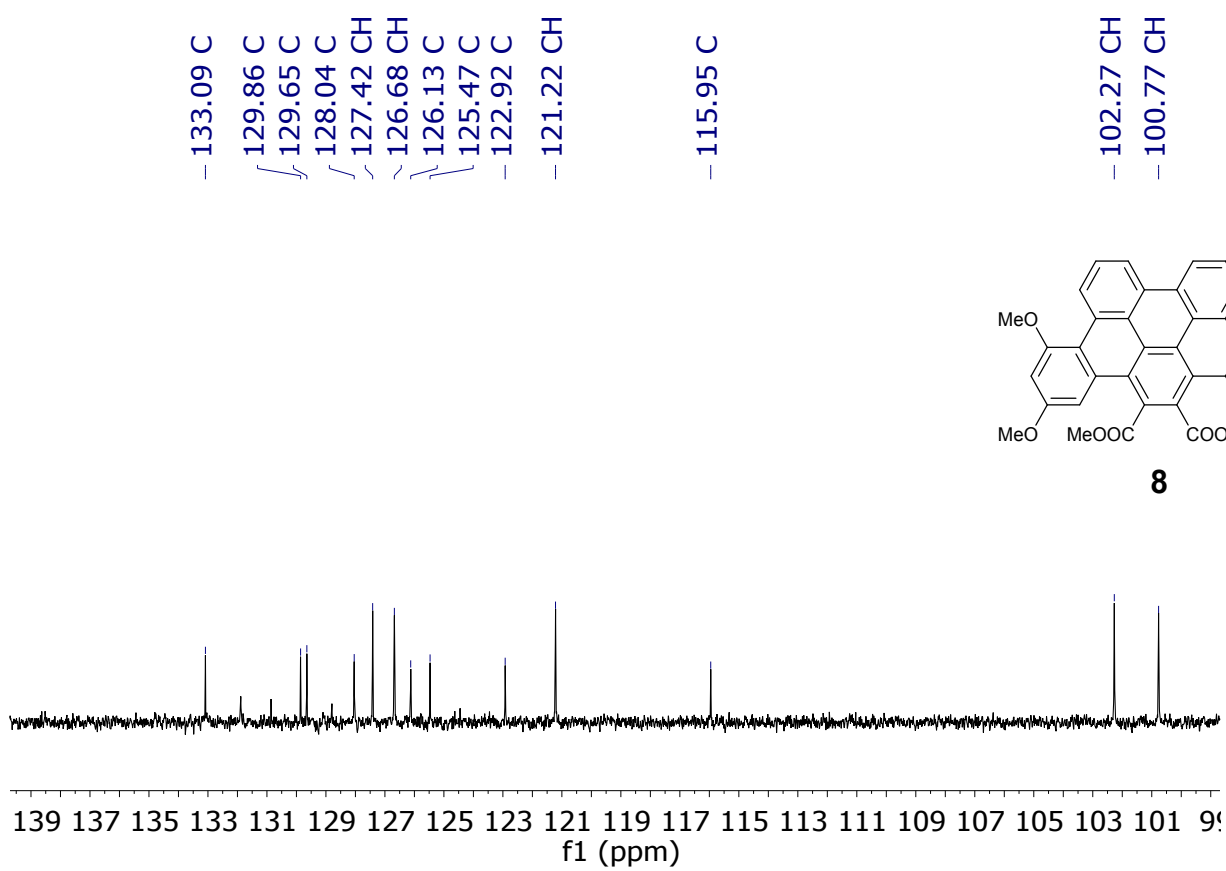

**Figure S6.**  $^1\text{H}$  NMR (300 MHz,  $\text{CDCl}_3$ ),  $^{13}\text{C}\{^1\text{H}\}$  NMR (75 MHz,  $\text{CDCl}_3$ ) and  $^{31}\text{P}\{^1\text{H}\}\{^{13}\text{C}\}$  NMR of **9**.

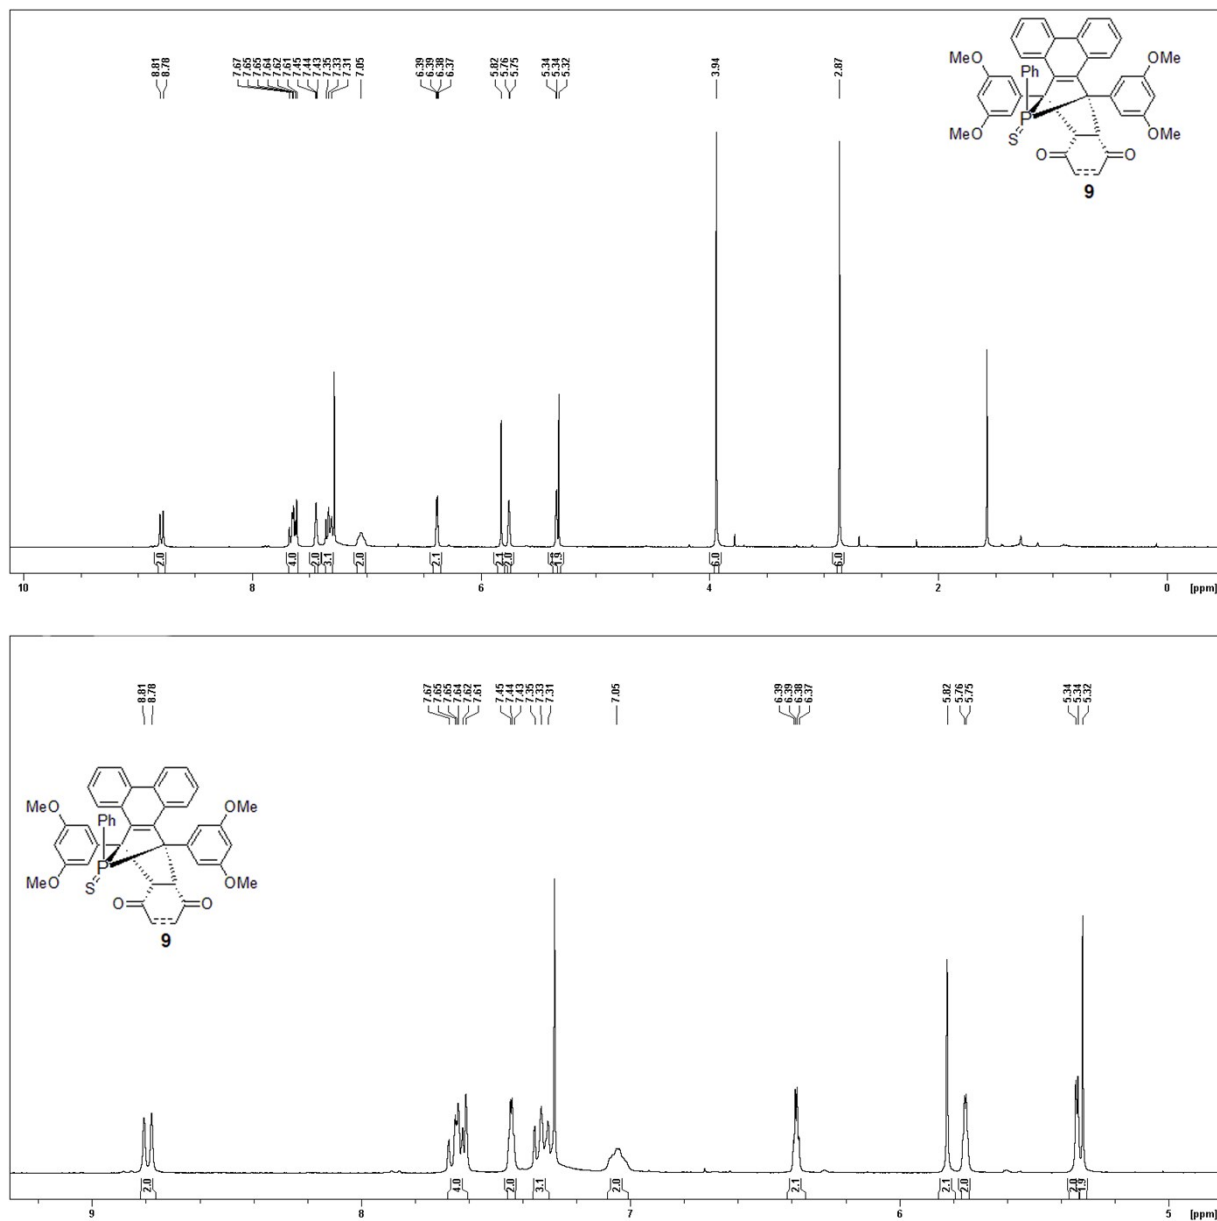

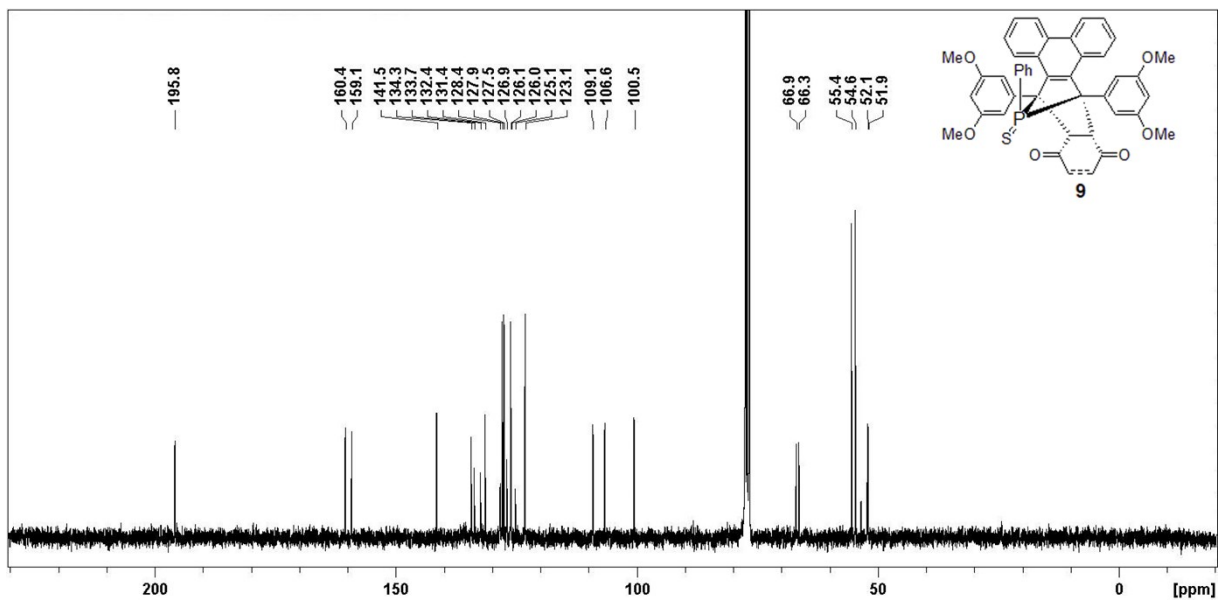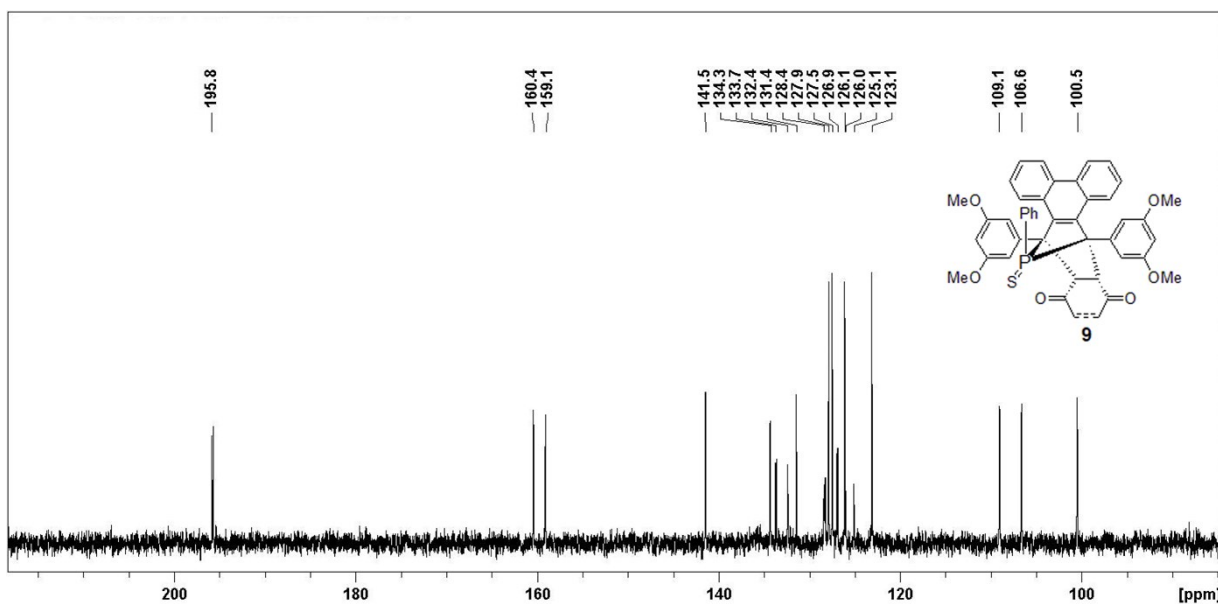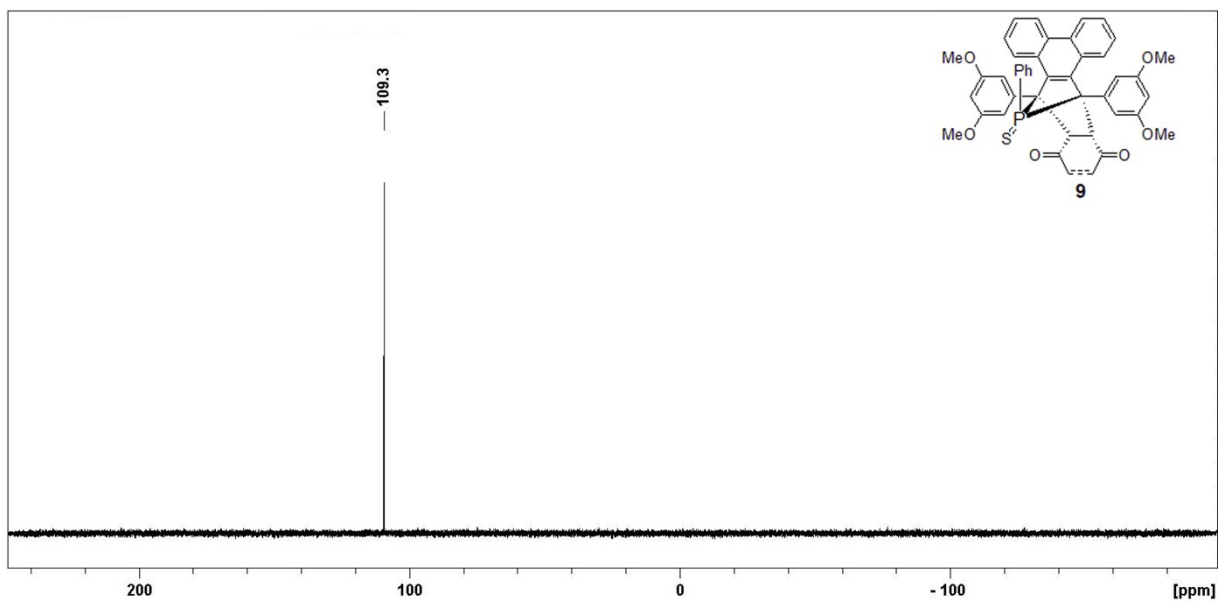

**Figure S7.**  $^1\text{H}$  NMR (300 MHz,  $\text{CDCl}_3$ ) and  $^{13}\text{C}\{^1\text{H}\}$  NMR (75 MHz,  $\text{CDCl}_3$ ) of **10**.

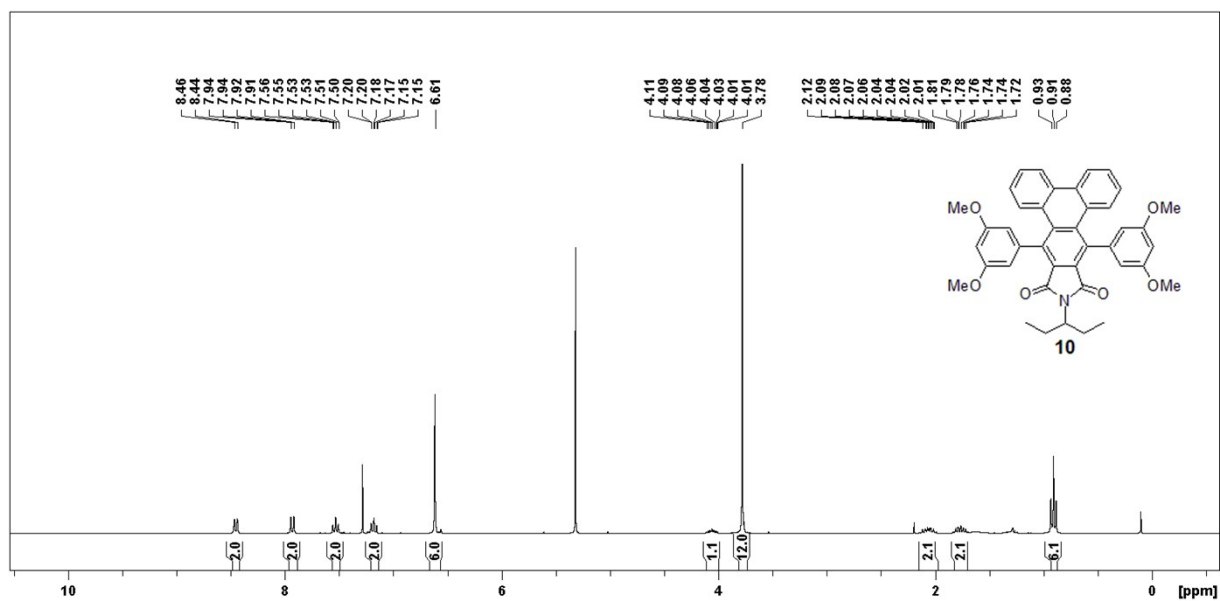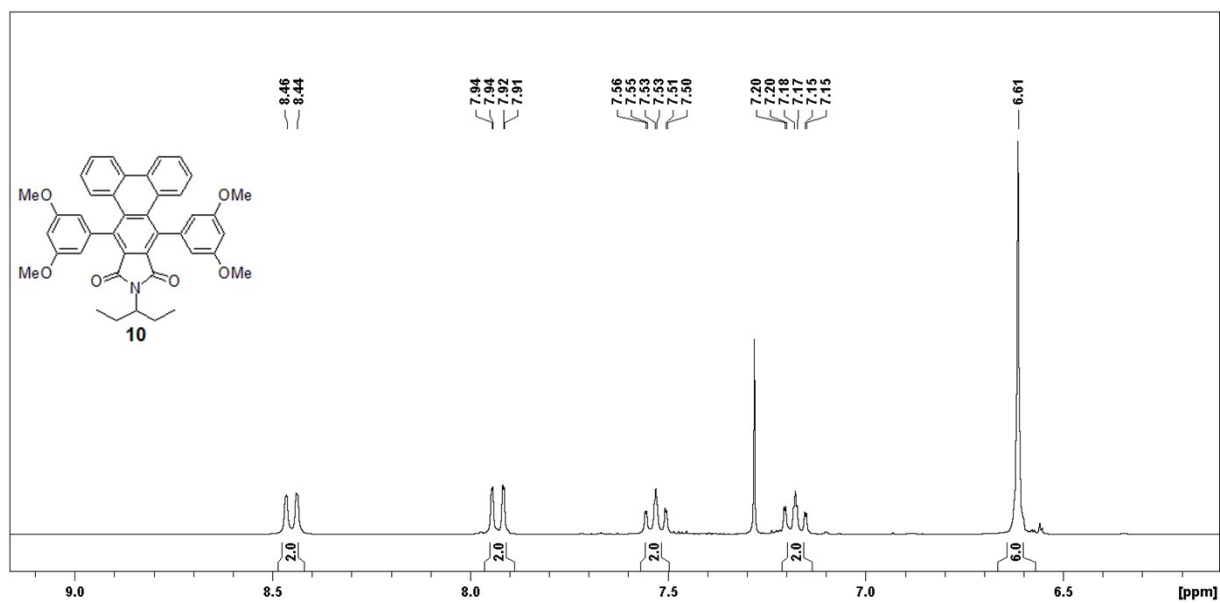

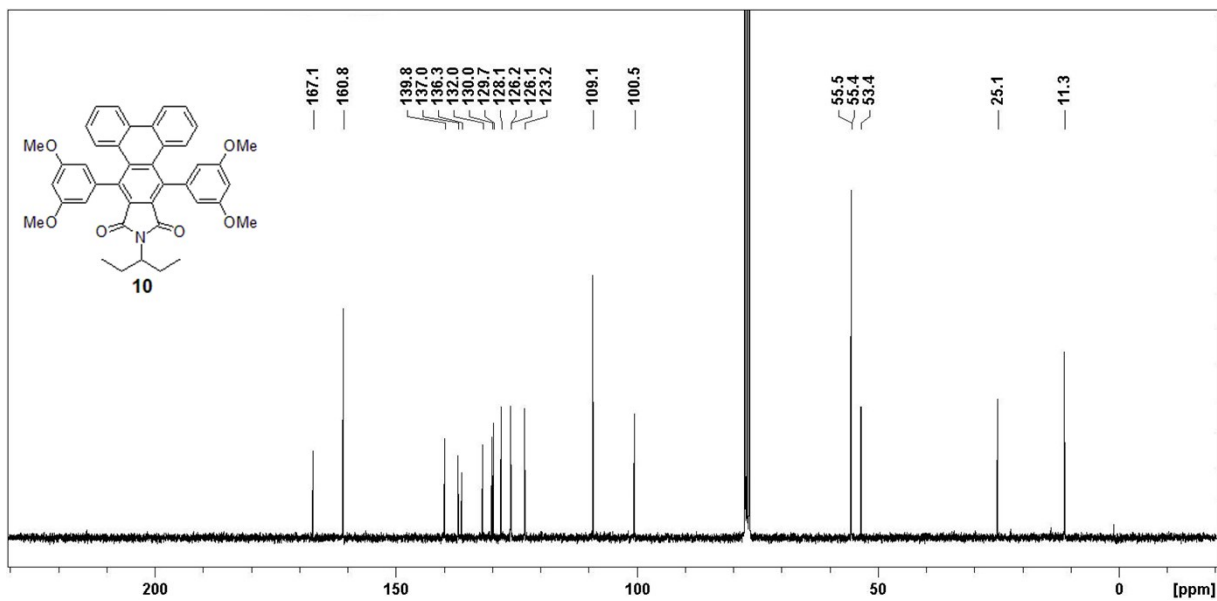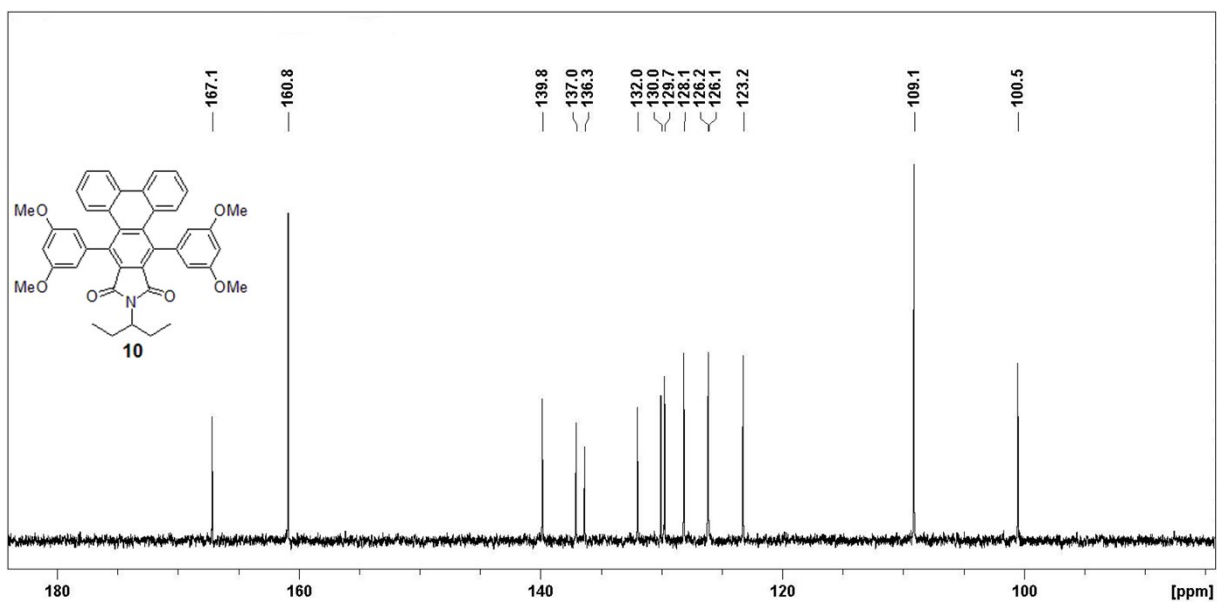

**Figure S8a:**  $^{31}\text{P}\{^1\text{H}\}$  NMR of the crude reaction mixture of **3** after 48h of heating in chlorobenzene ( $160^\circ\text{C}$ ) in absence of DMAD.

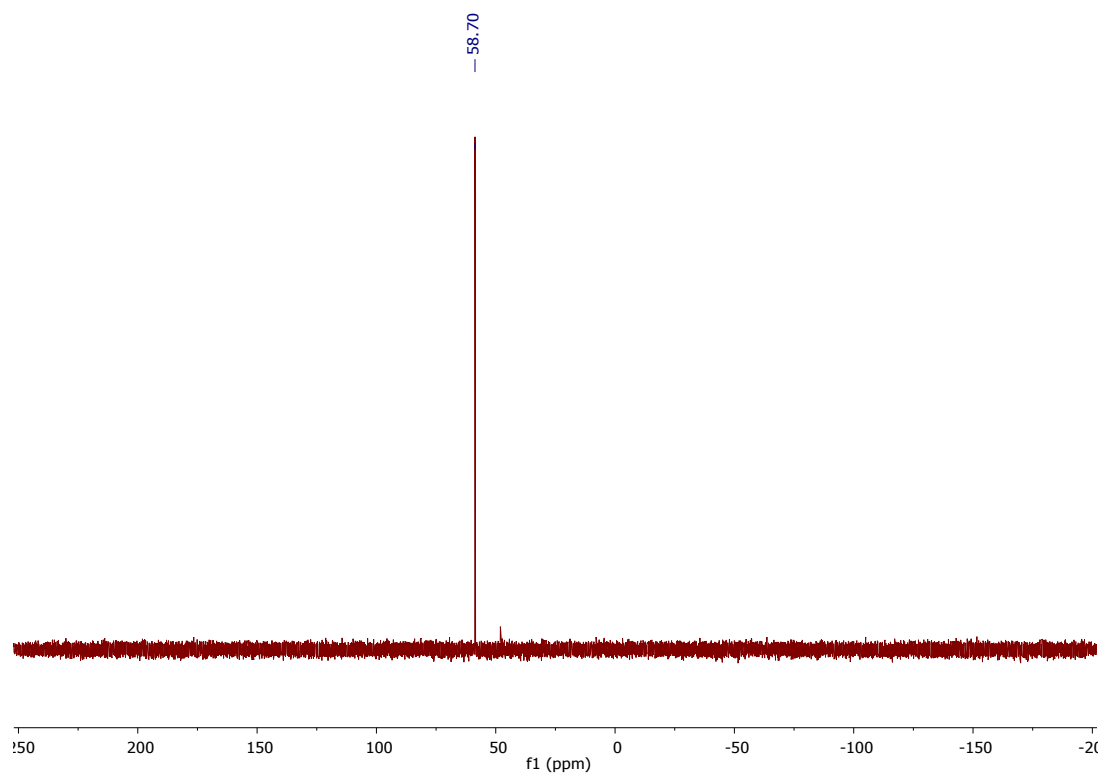

**Figure S8b.**  $^1\text{H}$  NMR (400 MHz,  $\text{CDCl}_3$ ) of purified **6** (top) and the crude reaction mixture (bottom).

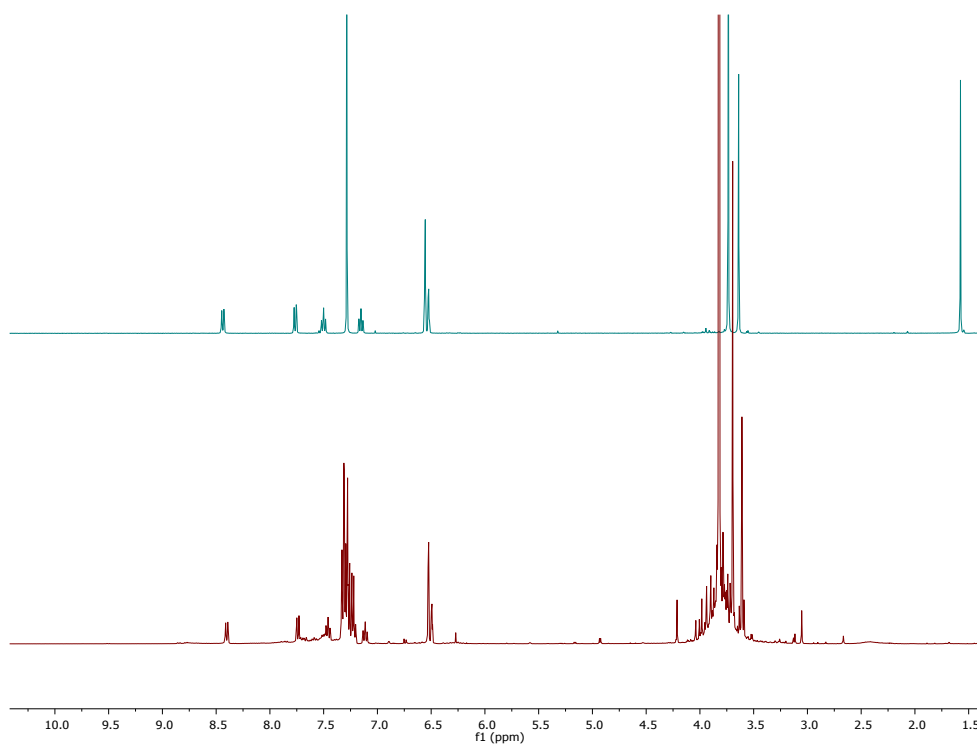

## X-ray Crystallographic Study:

**Crystal structure determination:** Single crystals suitable for X-Ray crystal analysis were obtained by slow diffusion of pentane vapors into a dichloromethane solution of the derivatives at room temperature. For compound **6** single crystal data collection were performed at 150 K with an APEX II Bruker-AXS diffractometer (Centre de Diffractométrie X, Institut des Sciences Chimiques de Rennes, UMR6226 CNRS-Université de Rennes 1, France) with Mo- $K\alpha$  radiation ( $\lambda = 0.71073 \text{ \AA}$ ), all the others diffraction data were collected on a D8 Venture Bruker-AXS diffractometer (Mo- $K\alpha$  radiation). The crystal structures were solved by dual-space algorithm using the SHELXT<sup>2a</sup> program for all compounds except compound **2** that has been solved using direct methods and the SIR97 program<sup>1b</sup>. Crystal structures were refined with full-matrix least-square methods based on  $F^2$  (SHELXL-97)<sup>2</sup> with the aid of the WINGX<sup>3</sup> program. All non-hydrogen atoms were refined with anisotropic atomic displacement parameters. H atoms were finally included in their calculated positions. Data of **7** were collected at low temperature (T=150K) on a high flux X-ray microsource diffractometer, of a very thin yellow stick, showing very poor diffraction power; even using long exposition time (320 sec/deg.) during rotation scans, the quality of the final data set was quite poor (Rint~19%), leading to a low quality of the structural refinement (R1~20%). However, this crystal structure shows unambiguously the negative curvature. Note that the asymmetric unit cell contains two crystallographically independent molecules of **7**, showing each of them the same curvature character.

Checkcif revealed the presence of a B alert (ADDSYM Detects New (Pseudo) Symm. Elem ) for **10** which can be explained by the presence of two slightly different molecules of **10** in the asymmetric unit.

---

<sup>1a</sup> G. M. Sheldrick, *Acta Cryst.* A71 (2015) 3-8

<sup>1b</sup> Altomare, A., Burla, M. C.; Camalli, M., Cascarano, G., Giacovazzo, C., Guagliardi, A., Moliterni, A. G. G., Polidori, G. R. Spagna, *J. Appl. Cryst.*, **1999**, 32, 115-119

<sup>2</sup> Sheldrick G.M., *Acta Cryst. A*, **2008**, 64, 112-122

<sup>3</sup> Farrugia, L. J. *J. Appl. Cryst.*, **2012**, 45, 849-854



**TABLE S1: CRYSTAL DATA AND STRUCTURE REFINEMENT**

| <b>Compound</b>                                  | <b>1</b>                                                            | <b>6</b>                                       | <b>7</b>                                       | <b>8</b>                                       | <b>9</b>                                                                                     | <b>10</b>                                       |
|--------------------------------------------------|---------------------------------------------------------------------|------------------------------------------------|------------------------------------------------|------------------------------------------------|----------------------------------------------------------------------------------------------|-------------------------------------------------|
| CCDC                                             | 1973069                                                             | 1895041                                        | 1956170                                        | 1895043                                        | 1895042                                                                                      | 1973065                                         |
| Formula                                          | C <sub>26</sub> H <sub>15</sub> OP, CH <sub>2</sub> Cl <sub>2</sub> | C <sub>38</sub> H <sub>32</sub> O <sub>8</sub> | C <sub>38</sub> H <sub>30</sub> O <sub>8</sub> | C <sub>38</sub> H <sub>28</sub> O <sub>8</sub> | C <sub>45</sub> H <sub>37</sub> O <sub>6</sub> P <sub>1</sub> S <sub>1</sub> Cl <sub>2</sub> | C <sub>41</sub> H <sub>37</sub> NO <sub>6</sub> |
| MW                                               | 459.27                                                              | 616.64                                         | 614.62                                         | 612.6                                          | 807.67                                                                                       | 639.71                                          |
| a (Å)                                            | 7.7006(4)                                                           | 9.1526(4)                                      | 13.107(2)                                      | 9.7076(4)                                      | 12.2704(11)                                                                                  | 9.4795(9)                                       |
| b (Å)                                            | 19.7017(12)                                                         | 13.7940(6)                                     | 13.566(2)                                      | 11.8242(4)                                     | 12.9162(10)                                                                                  | 13.3263(11)                                     |
| c (Å)                                            | 27.3827(16)                                                         | 15.1145(6)                                     | 32.525(6)                                      | 12.4785(4)                                     | 14.0637(11)                                                                                  | 26.101(3)                                       |
| $\alpha$ (°)                                     | 90                                                                  | 107.493(2)                                     | 90                                             | 87.7010(10)                                    | 105.461(3)                                                                                   | 94.943(3)                                       |
| $\beta$ (°)                                      | 90                                                                  | 92.096(2)                                      | 90.549(8)                                      | 78.0410(10)                                    | 91.247(3)                                                                                    | 98.261(4)                                       |
| $\gamma$ (°)                                     | 90                                                                  | 102.376(2)                                     | 90                                             | 89.1850(10)                                    | 115.181(3)                                                                                   | 98.981(3)                                       |
| V (Å <sup>3</sup> )                              | 4154.4(4)                                                           | 1767.20(13)                                    | 5783.2(18)                                     | 1400.10(9)                                     | 1920.6(3)                                                                                    | 3203.1(5)                                       |
| Z                                                | 8                                                                   | 2                                              | 8                                              | 2                                              | 2                                                                                            | 4                                               |
| Dc (g.cm <sup>-3</sup> )                         | 1.469                                                               | 1.159                                          | 1.412                                          | 1.453                                          | 1.397                                                                                        | 1.327                                           |
| Crystal system                                   | orthorhombic                                                        | triclinic                                      | monoclinic                                     | triclinic                                      | triclinic                                                                                    | triclinic                                       |
| Space group                                      | <i>Pbc</i> a                                                        | P -1                                           | P 2 <sub>1</sub> /c                            | P -1                                           | P -1                                                                                         | P -1                                            |
| T (K)                                            | 150                                                                 | 150                                            | 150                                            | 150                                            | 150                                                                                          | 150                                             |
| Wavelength Mo-K $\alpha$ (Å)                     | 0.71073                                                             | 0.71073                                        | 0.71073                                        | 0.71073                                        | 0.71073                                                                                      | 0.71073                                         |
| $\mu$ (mm <sup>-1</sup> )                        | 0.408                                                               | 0.081                                          | 0.099                                          | 0.102                                          | 0.316                                                                                        | 0.089                                           |
| <i>F</i> (000)                                   | 1888                                                                | 648                                            | 2576                                           | 640                                            | 840                                                                                          | 1352                                            |
| $\theta$ limit (°)                               | 2.936-27.459                                                        | 2.29-27.48                                     | 2.161-28.017                                   | 2.35-27.45                                     | 2.58- 27.48                                                                                  | 2.914-27.484                                    |
| Index ranges                                     | -9<h<8                                                              | -11<h<11                                       | -16<h<16                                       | -12<h<12                                       | -15<h<15                                                                                     | -12<h<12                                        |
| <i>hkl</i>                                       | -25<k<25                                                            | -17<k<17                                       | -17<k<17                                       | -15<k<15                                       | -16<k<16                                                                                     | -16<k<17                                        |
|                                                  | -35<l<35                                                            | -15<l<19                                       | -42<l<42                                       | -16<l<15                                       | -18<l<17                                                                                     | -33<l<33                                        |
| Reflections collected                            | 24415                                                               | 25202                                          | 49197                                          | 23410                                          | 43243                                                                                        | 90824                                           |
| Reflections [ <i>I</i> >2 $\sigma$ ( <i>I</i> )] | 3800                                                                | 6319                                           | 7391                                           | 5072                                           | 6557                                                                                         | 10819                                           |
| Data / restraints / parameters                   | 4612 / 0 / 280                                                      | 8015/0/ 421                                    | 13385/0/ 559                                   | 6376/0/421                                     | 8789/0/ 501                                                                                  | 14695/0/877                                     |
| Goodness-of-fit on <i>F</i> <sup>2</sup>         | 1.018                                                               | 1.113                                          | 1.112                                          | 1.040                                          | 1.088                                                                                        | 1.014                                           |
| Final <i>R</i> indices                           | R1 = 0.0634                                                         | R1 = 0.0473                                    | R1 = 0.2032                                    | R1 = 0.0397                                    | R1 = 0.0542                                                                                  | R1 = 0.0456                                     |
| [ <i>I</i> >2 $\sigma$ ( <i>I</i> )]             | wR2=0.1575                                                          | wR2=0.1405                                     | wR2=0.4287                                     | wR2=0.104                                      | wR2= 0.1235                                                                                  | wR2= 0.1031                                     |
| <i>R</i> indices (all data)                      | R1 = 0.0772<br>wR2 = 0.1686                                         | R1 = 0.0587<br>wR2 = 0.1492                    | R1 = 0.2878<br>wR2 = 0.4658                    | R1 = 0.0539<br>wR2 = .1129                     | R1 = 0.0818<br>wR2 = 0.1359                                                                  | R1 = 0.0721<br>wR2 = 0.1159                     |
| Largest diff peak and hole (e Å <sup>-3</sup> )  | 1.667 -1.321                                                        | 0.304 -0.212                                   | 1.154 -0.817                                   | 0.325 -0.23                                    | 1.092 -1.202                                                                                 | 0.350-0.272                                     |

**Figure S9.** Molecular structure of **1**.CH<sub>2</sub>Cl<sub>2</sub> (thermal ellipsoids 50% probability).

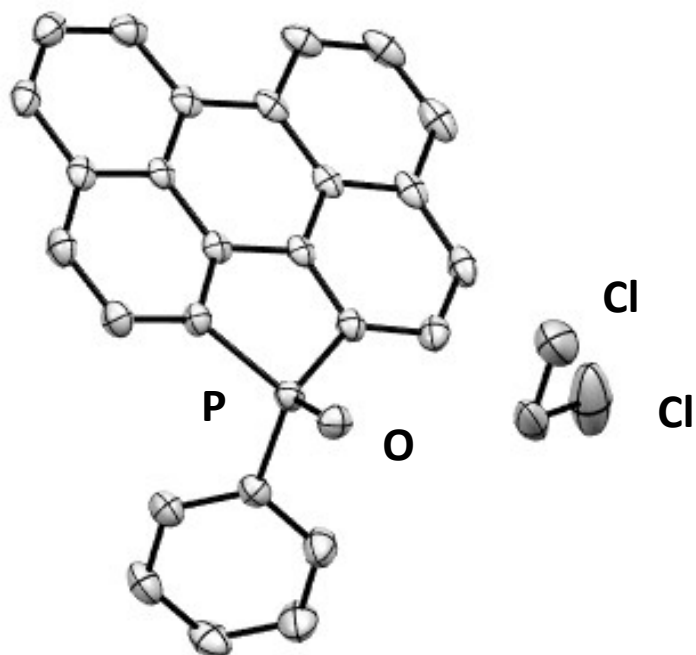

**Figure S10.** Molecular structure of **6** (thermal ellipsoids 50% probability).

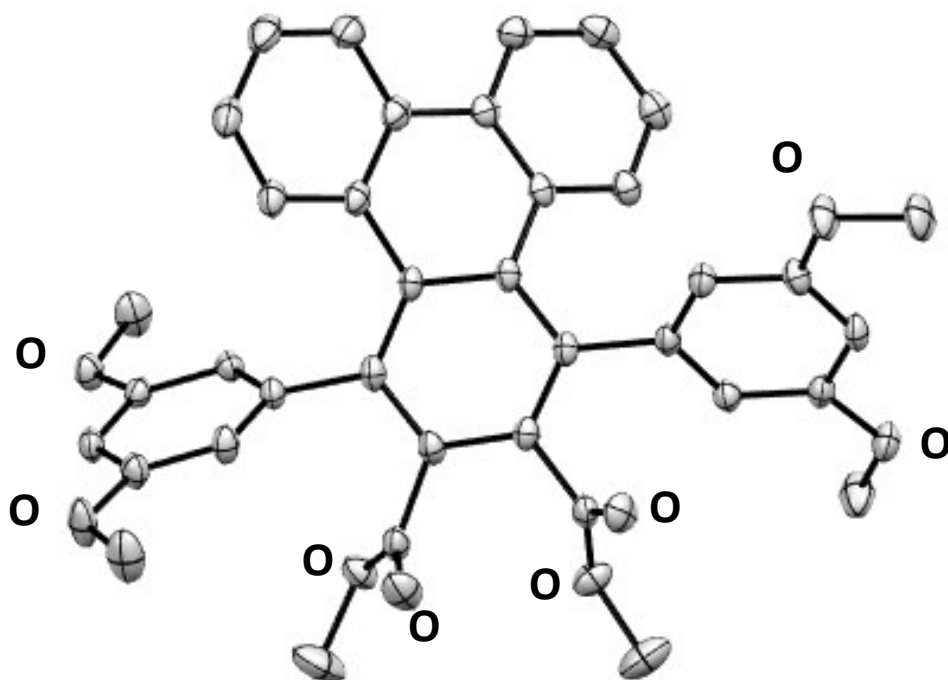

**Figure S11.** Molecular structure of **7** (thermal ellipsoids 50% probability).

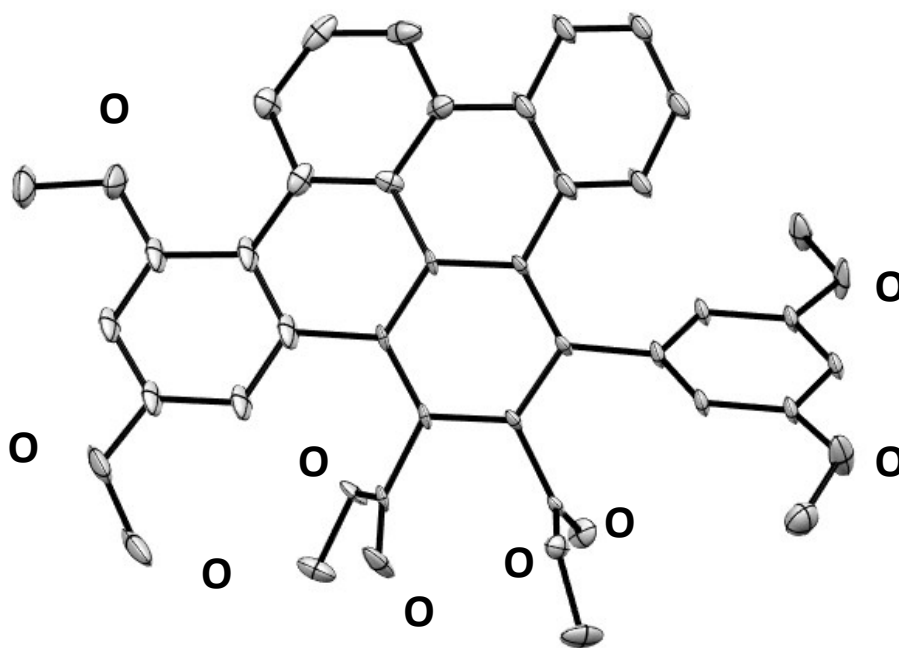

**Figure S12.** Molecular structure of **8** (thermal ellipsoids 50% probability).

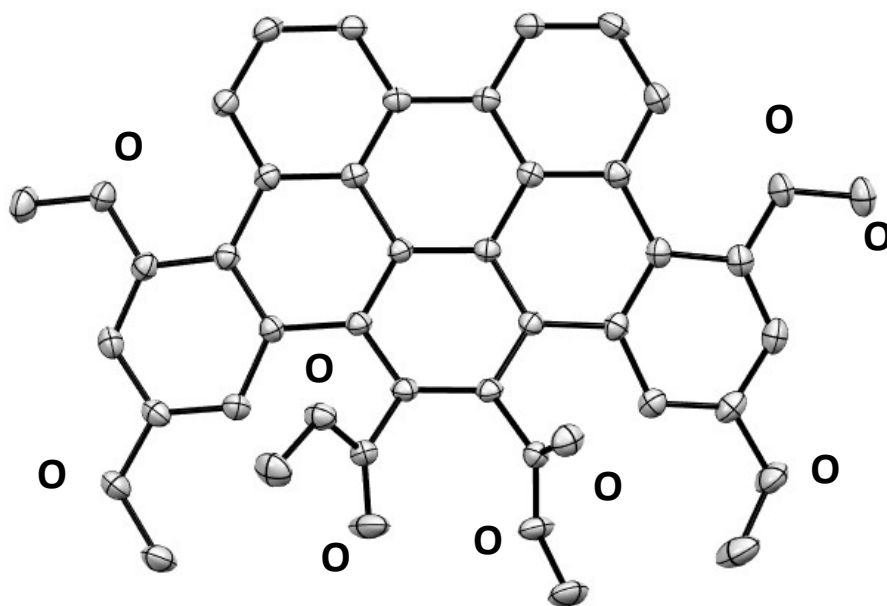

**Figure S13.** Molecular structure of **10** (thermal ellipsoids 50% probability).

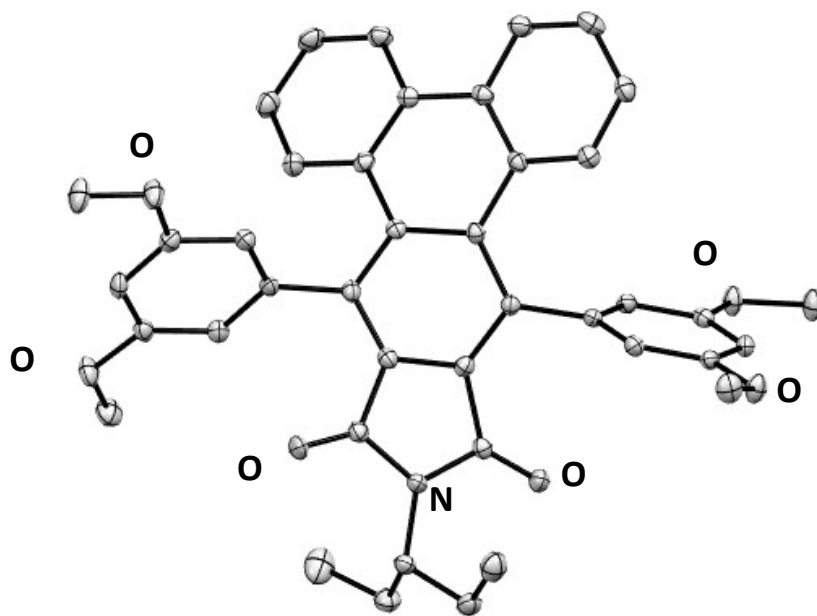

**Figure S14.** Molecular structure of **9**.CH<sub>2</sub>Cl<sub>2</sub> (thermal ellipsoids 50% probability).

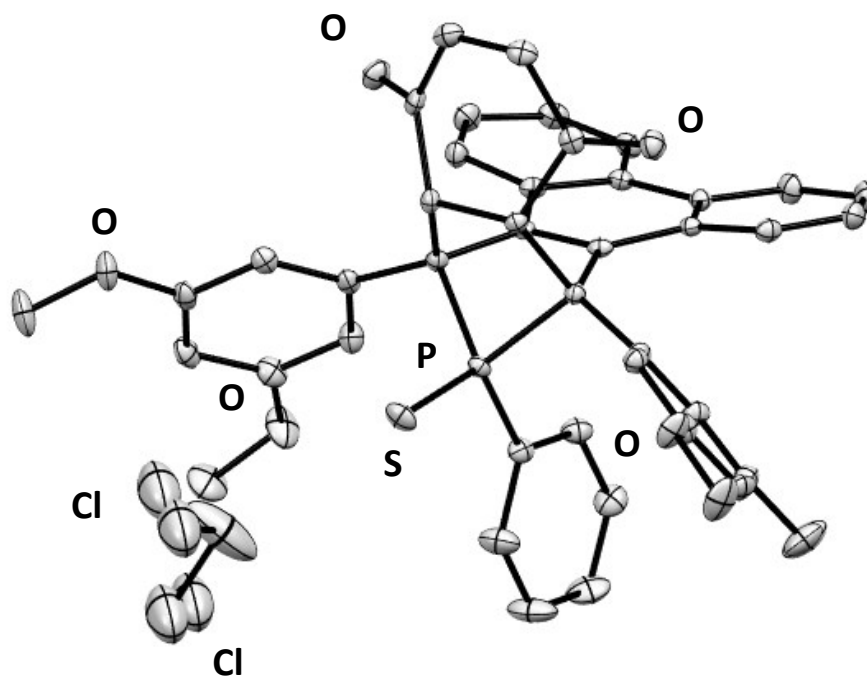

**Figure S15.**  $\pi$ -dimers observed in the packing of **8**

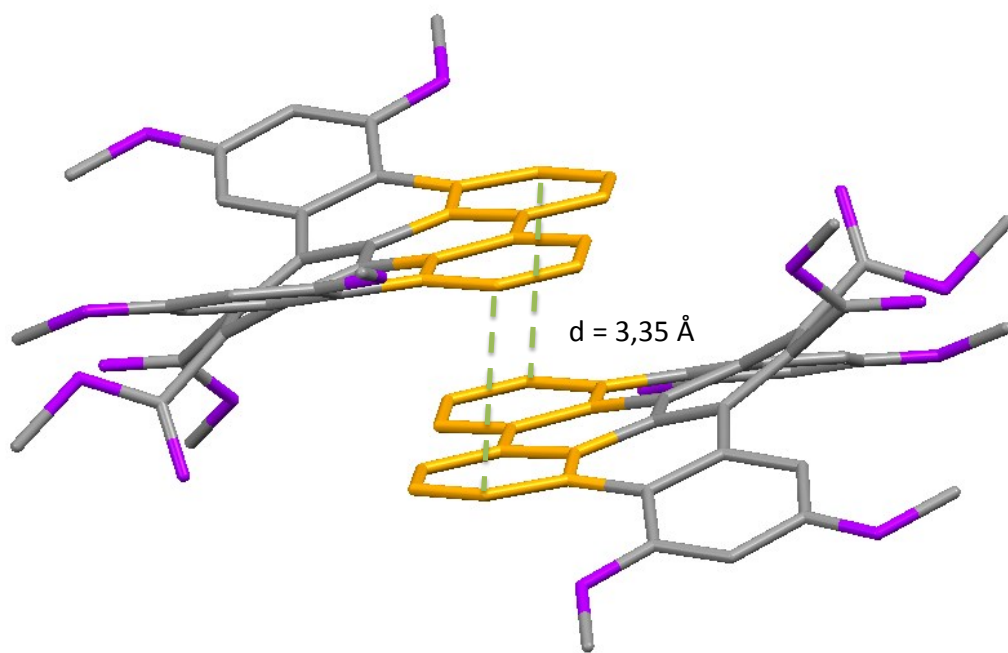

## Optical and redox properties

**Figure S16.** Experimental absorption, excitation and emission spectra of **1**

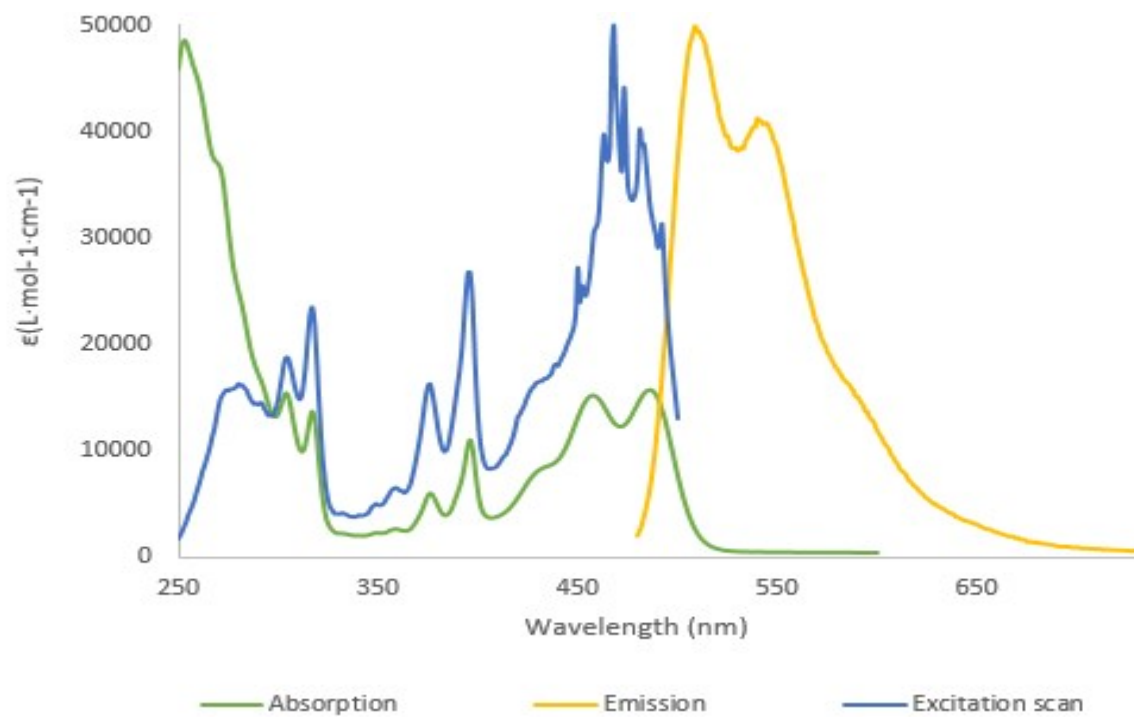

**Figure S17.** Experimental absorption, excitation and emission spectra of **2**

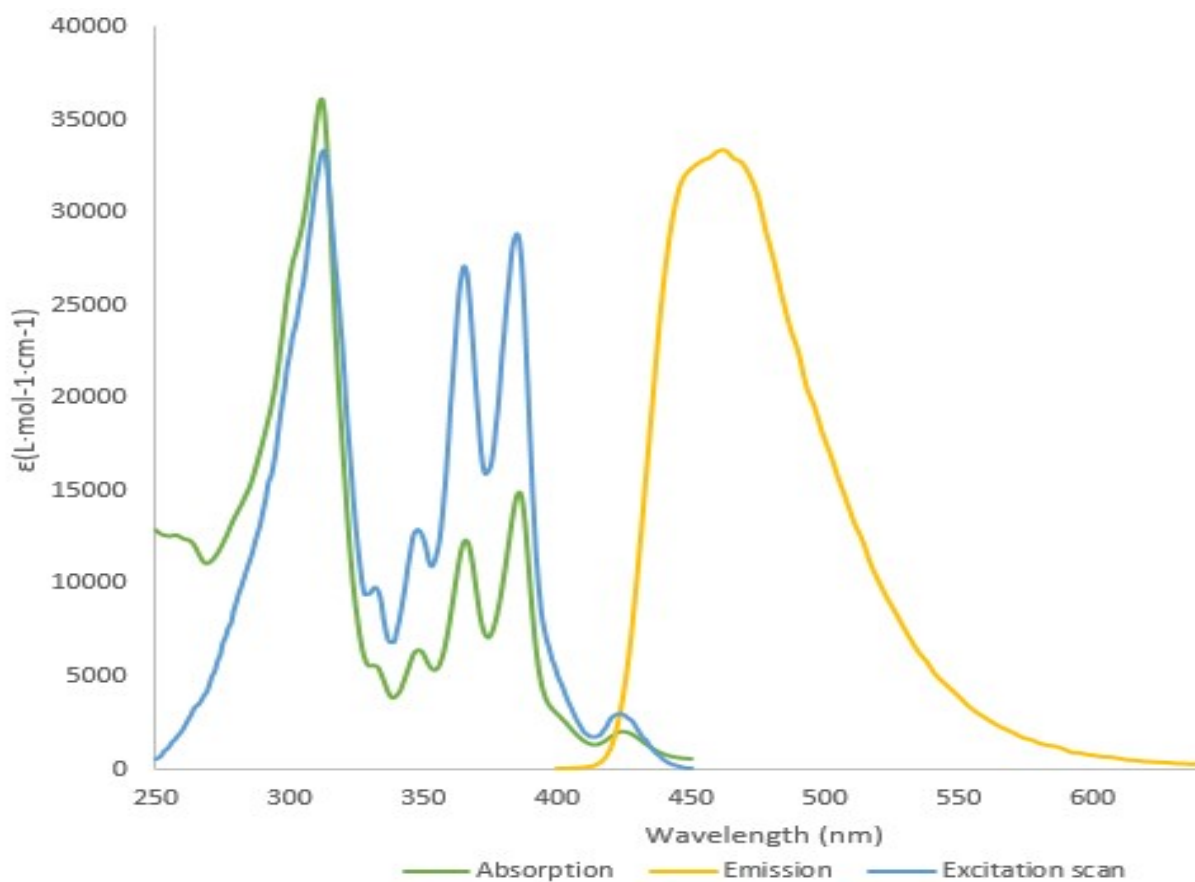

**Figure S18:** Experimental absorption, excitation and emission spectra of **6**

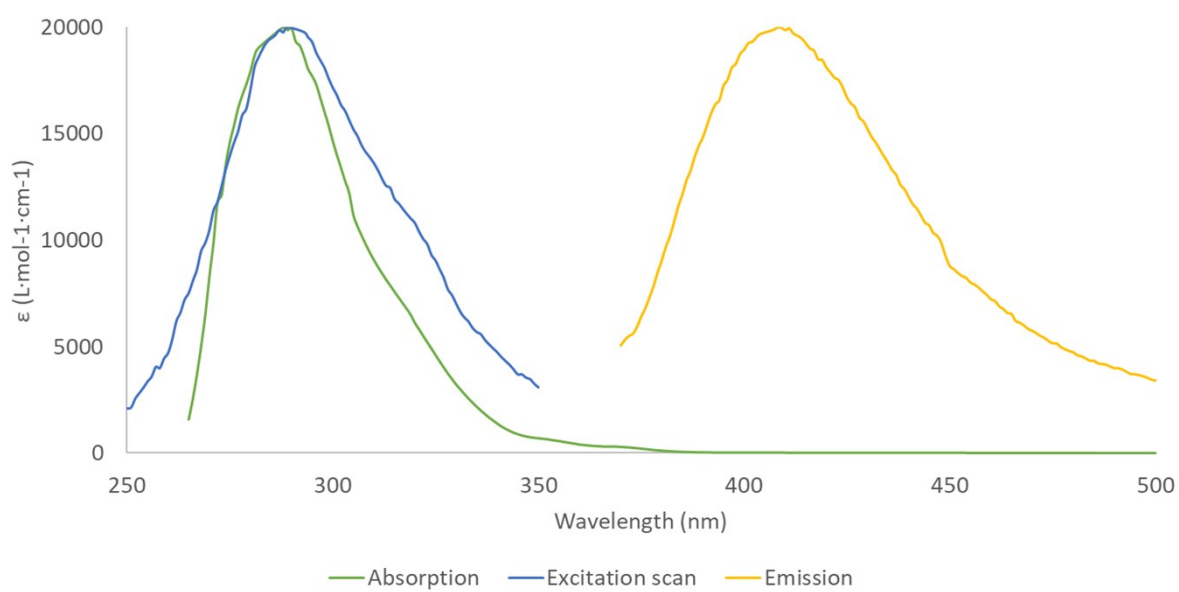

**Figure S19.** Experimental absorption, excitation and emission spectra of **7**

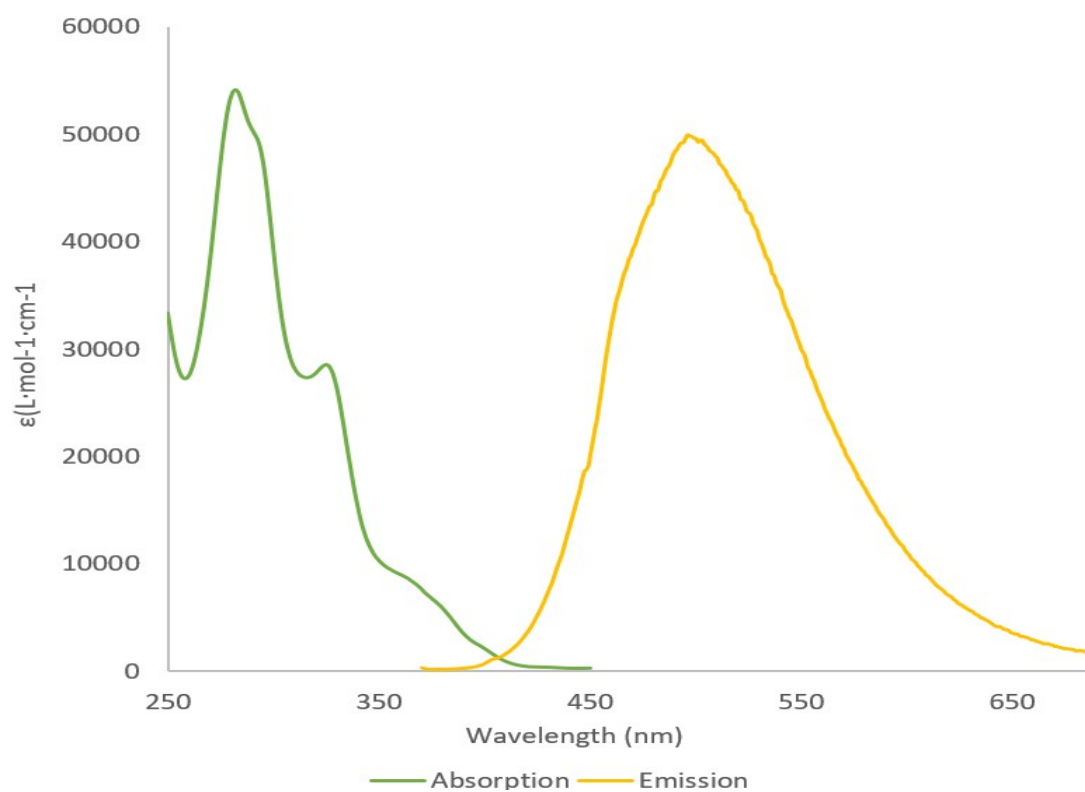

**Figure S20.** Experimental absorption, excitation and emission spectra of **8**

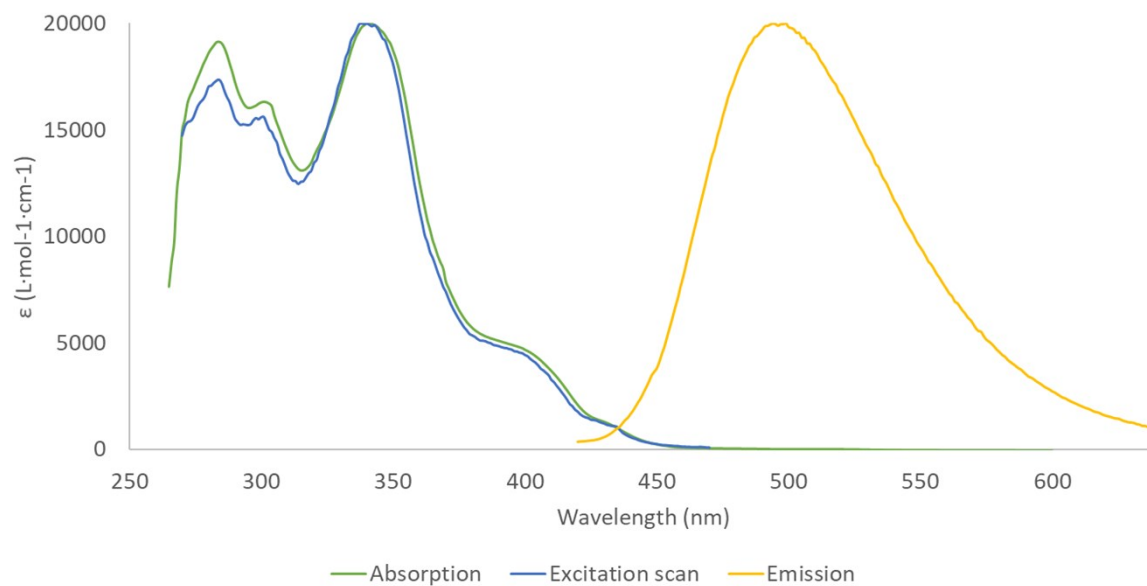



## Electrochemical data

**Figure S21:** Cyclic voltammogram of **1** ( $c = 10^{-3}$  M) in DCM ( $\text{Bu}_4\text{NPF}_6$  (0.2 M),  $200 \text{ mVs}^{-1}$ , potentials vs  $\text{Fc}^+/\text{Fc}^*$ ).

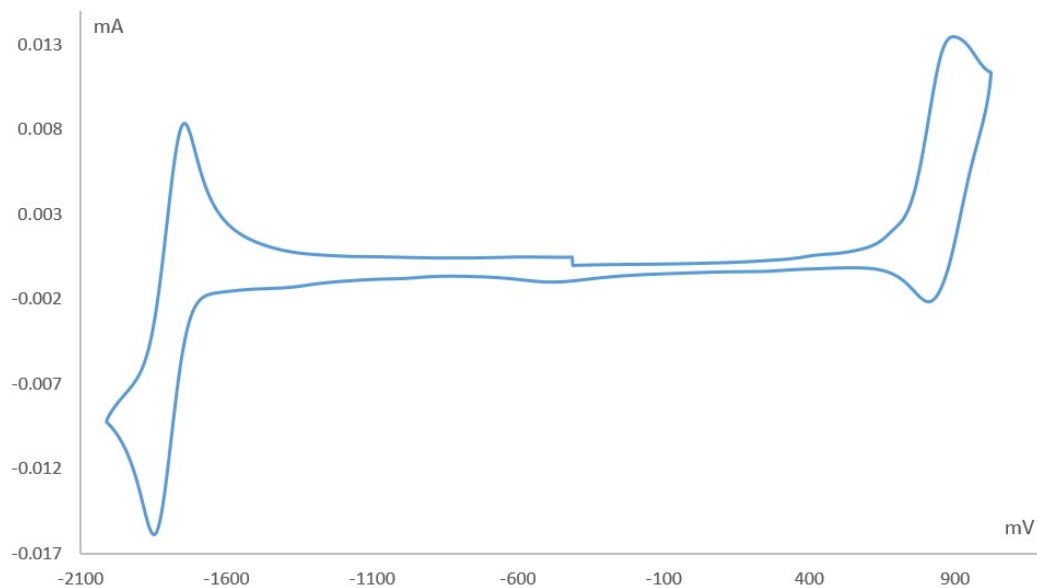

**Figure S22:** Cyclic voltammogram of **6** ( $c = 10^{-3}$  M) in DCM ( $\text{Bu}_4\text{NPF}_6$  (0.2 M),  $200 \text{ mVs}^{-1}$ , potentials vs  $\text{Fc}^+/\text{Fc}^*$ ).

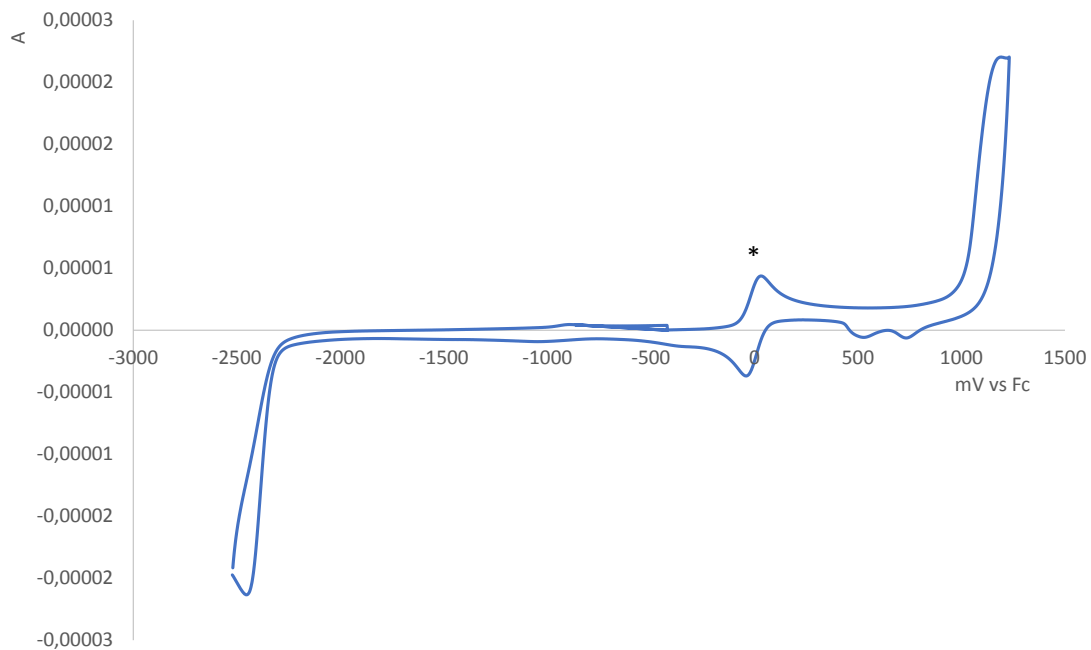

**Figure S23:** Cyclic voltammogram of **7** ( $c = 10^{-3}$  M) in DCM ( $\text{Bu}_4\text{NPF}_6$  (0.2 M), 200  $\text{mVs}^{-1}$ , potentials vs  $\text{Fc}^+/\text{Fc}^*$ ).

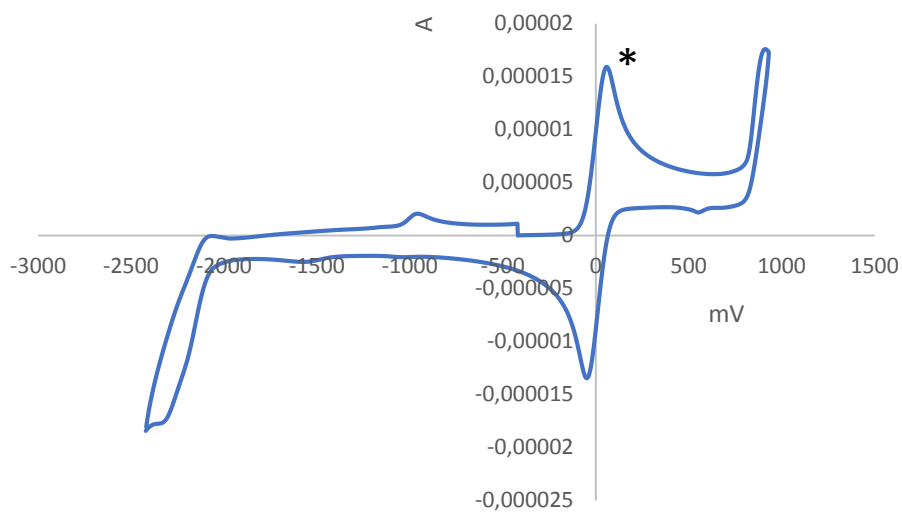

**Figure S24:** Cyclic voltammogram of **8** ( $c = 10^{-3}$  M) in DCM ( $\text{Bu}_4\text{NPF}_6$  (0.2 M), 200  $\text{mVs}^{-1}$ , potentials vs  $\text{Fc}^+/\text{Fc}^*$ ).

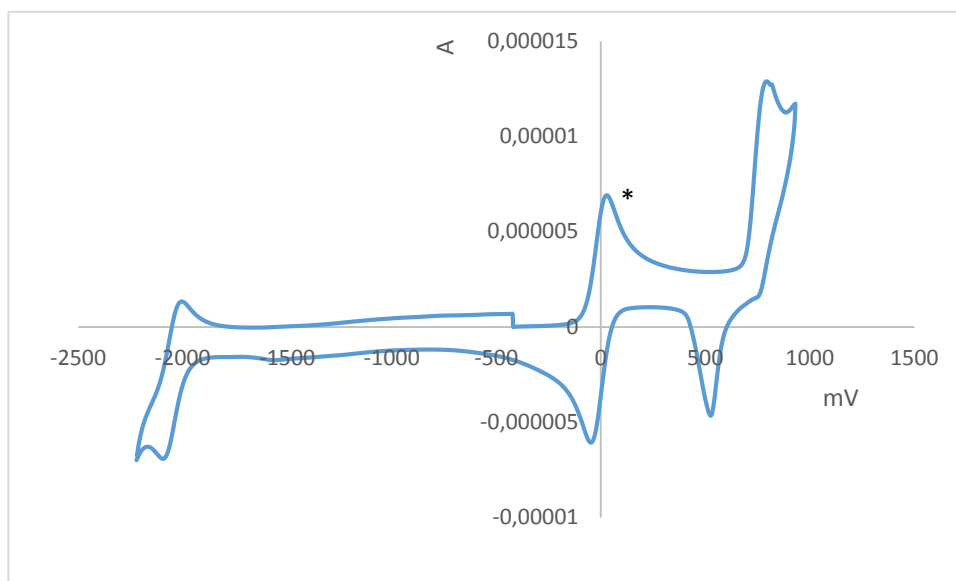

## Theoretical investigations

To perform the computations the Gaussian 09<sup>4</sup> and MRCC<sup>5</sup> suites of programs were used. All structures were optimized using the B3LYP and B3LYPD3 functionals combined with the 6-31+G\* and 6-311+G\* basis sets. For the ADC2 method the cc-pVDZ basis set was applied. At each of the optimized structures vibrational analysis was performed to check whether the stationary point located is a minimum on the potential energy hypersurface (no imaginary frequencies were obtained) or in the case of the planar structures the stationary points are not minima, but higher order saddle points on the potential energy surface (see NImag). The molecular orbitals were visualized with Avogadro program<sup>6</sup>. The geometries were plotted with Molden<sup>78</sup>.

### Figure S25. view of the Frontier Molecular Orbitals of **1** at the B3LYP/6-31+G\* level

---

<sup>4</sup> Gaussian 09 RE 0., M. J. Frisch, G. W. Trucks, H. B. Schlegel, G. E. Scuseria, M. A. Robb, J. R. Cheeseman, G. Scalmani, V. Barone, B. Mennucci, G. A. Petersson, H. Nakatsuji, M. Caricato, X. Li, H. P. Hratchian, A. F. Izmaylov, J. Bloino, G. Zheng, J. L. Sonnenberg, M. Hada, M. Ehara, K. Toyota, R. Fukuda, J. Hasegawa, M. Ishida, T. Nakajima, Y. Honda, O. Kitao, H. Nakai, T. Vreven, J. A. Montgomery, Jr., J. E. Peralta, F. Ogliaro, M. Bearpark, J. J. Heyd, E. Brothers, K. N. Kudin, V. N. Staroverov, T. Keith, R. Kobayashi, J. Normand, K. Raghavachari, A. Rendell, J. C. Burant, S. S. Iyengar, J. Tomasi, M. Cossi, N. Rega, J. M. Millam, M. Klene, J. E. Knox, J. B. Cross, V. Bakken, C. Adamo, J. Jaramillo, R. Gomperts, R. E. Stratmann, O. Yazyev, A. J. Austin, R. Cammi, C. Pomelli, J. W. Ochterski, R. L. Martin, K. Morokuma, V. G. Zakrzewski, G. A. Voth, P. Salvador, J. J. Dannenberg, S. Dapprich, A. D. Daniels, O. Farkas, J. B. Foresman, J. V. Ortiz, J. Cioslowski, and D. J. Fox, Gaussian, Inc., Wallingford CT, 2013.

<sup>5</sup> Mrcc, a quantum chemical program suite written by M. Kállay, P. R. Nagy, Z. Rolik, D. Mester, G. Samu, J. Csontos, J. Csóka, B. P. Szabó, L. Gyevi-Nagy, I. Ladjánszki, L. Szegedy, B. Ladóczki, K. Petrov, M. Farkas, P. D. Mezei, and B. Hégyel. See also Z. Rolik, L. Szegedy, I. Ladjánszki, B. Ladóczki, and M. Kállay, *J. Chem. Phys.* **139**, 094105 (2013), as well as: [www.mrcc.hu](http://www.mrcc.hu)

<sup>6</sup> <https://avogadro.cc/>

<sup>7</sup> G. Schaftenaar, J.H. Noordik *J. Comput.-Aided. Mol. Des.* **2000**, *14*, 123-134.

<sup>8</sup> G. Schaftenaar, E. Vlieg, G. Vriend *J. Comput.-Aided. Mol. Des.* **2017**, *31*, 789-800.

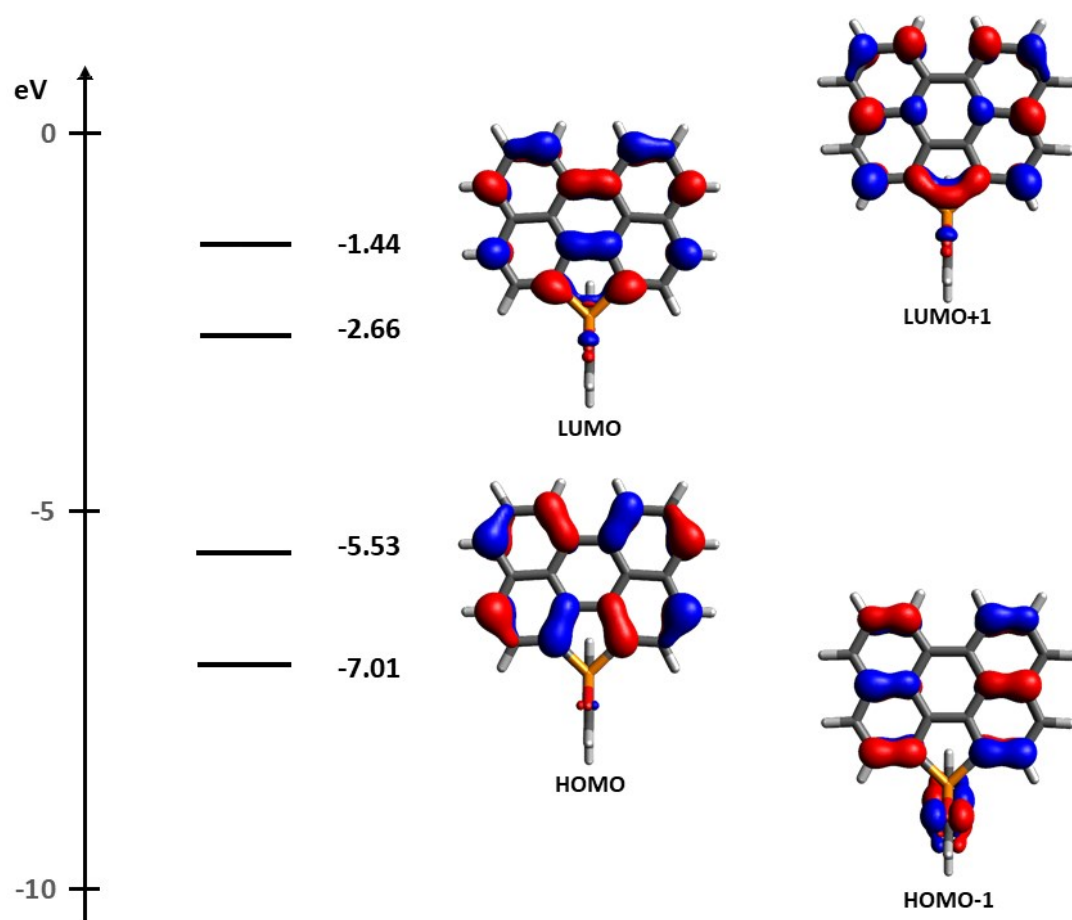

**Figure S26.** view of the Frontier Molecular Orbitals of **2** at the B3LYP/6-31+G\* level

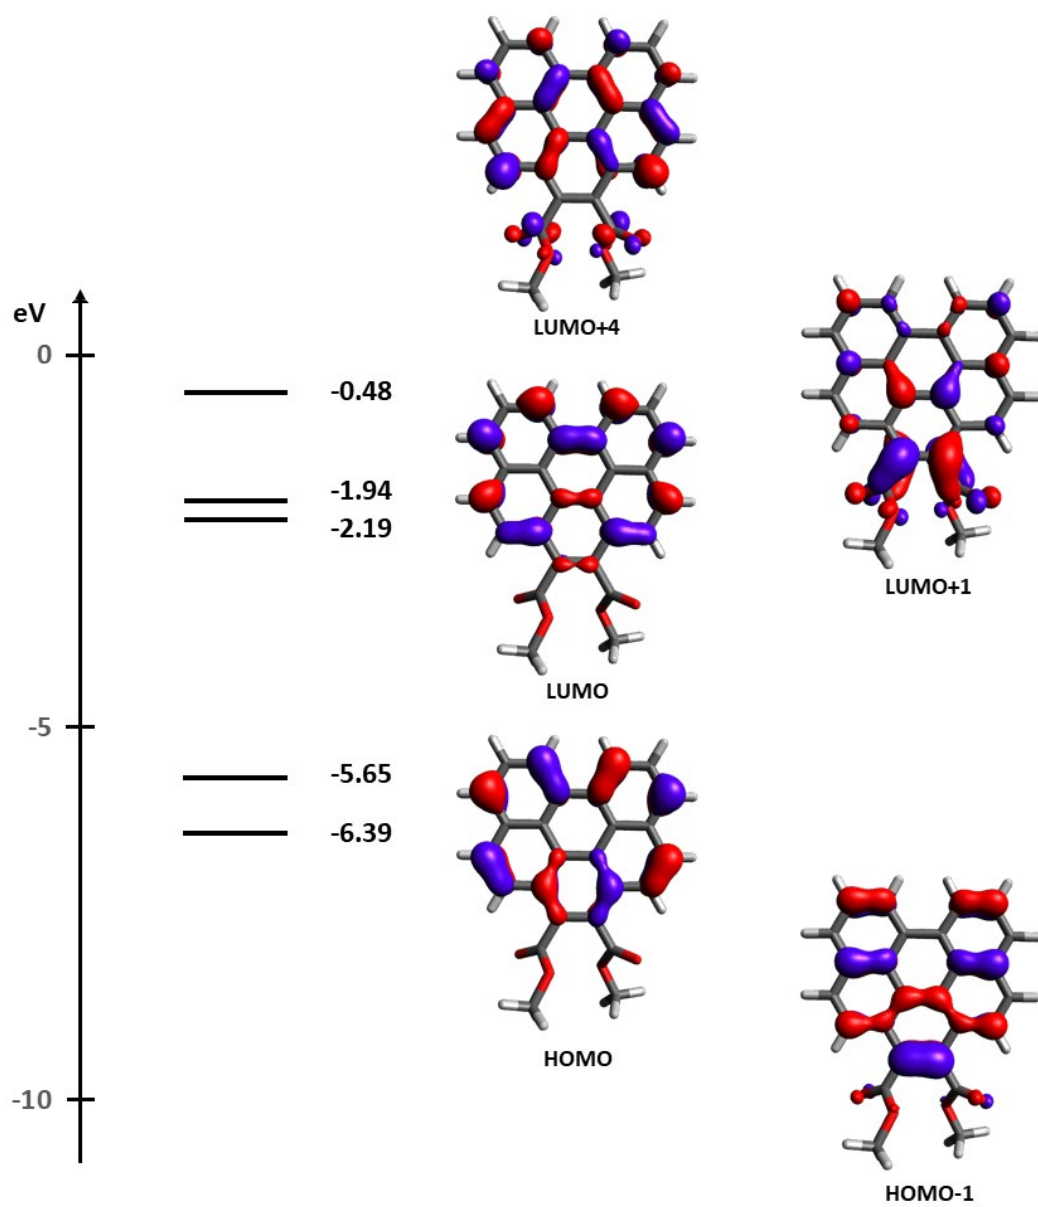

**Figure S27.** view of the Frontier Molecular Orbitals of **6** at the B3LYP/6-31+G\* level

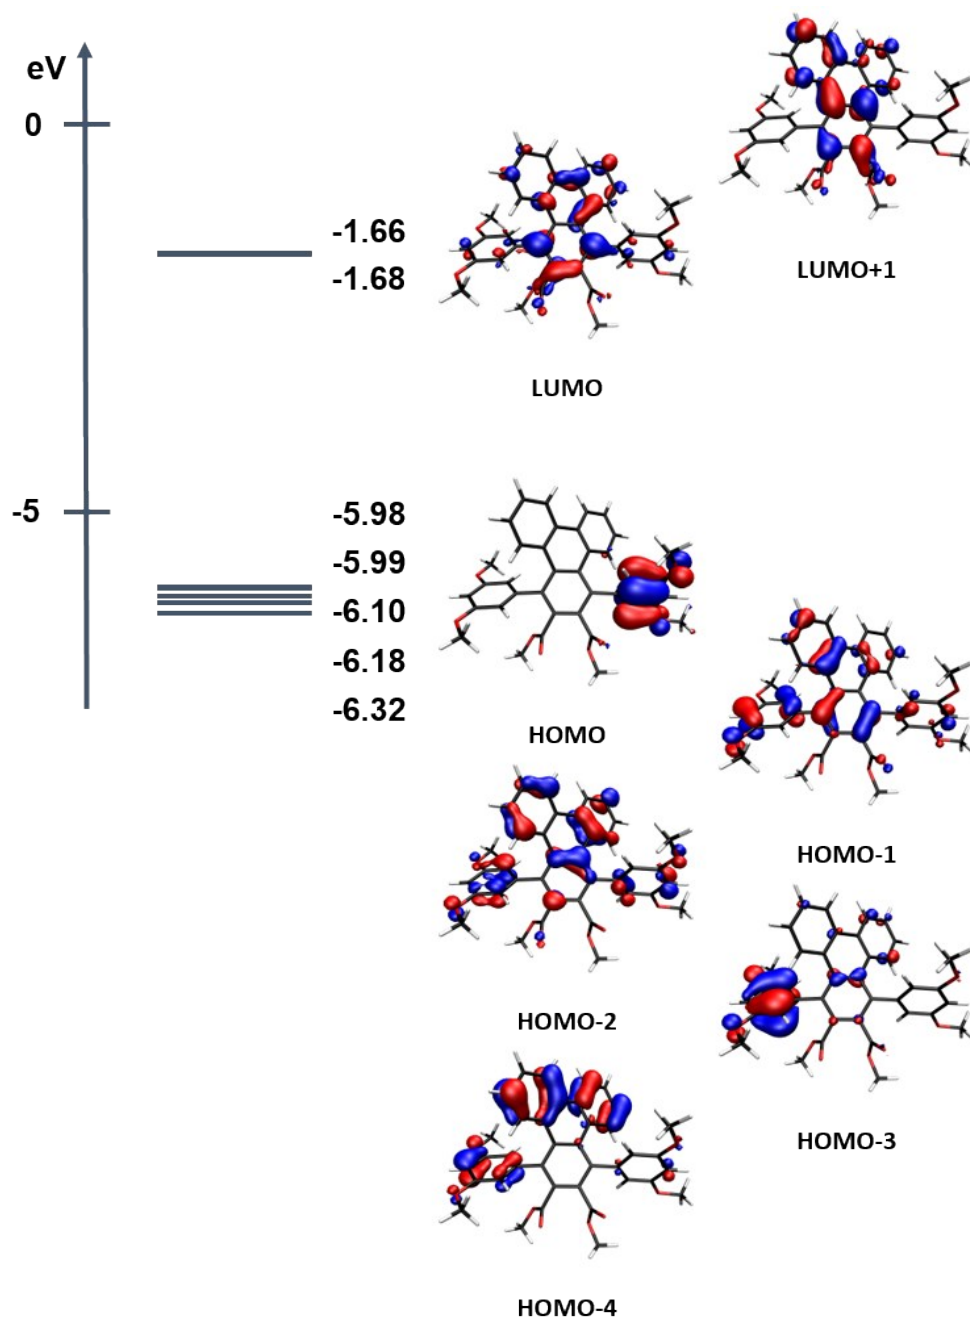

**Figure S28.** view of the Frontier Molecular Orbitals of 7 at the B3LYP/6-31+G\* level

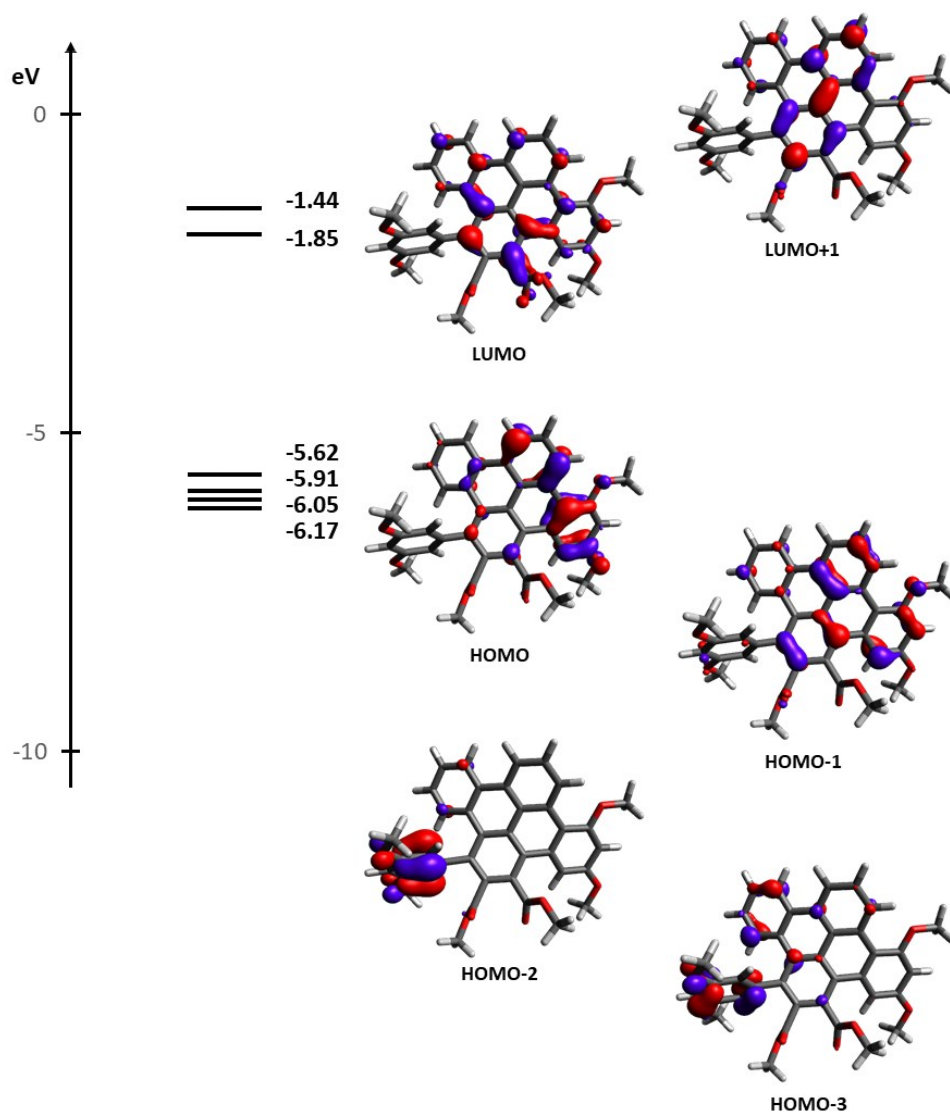

**Figure S29.** view of the Frontier Molecular Orbitals of **8** at the B3LYP/6-31+G\* level

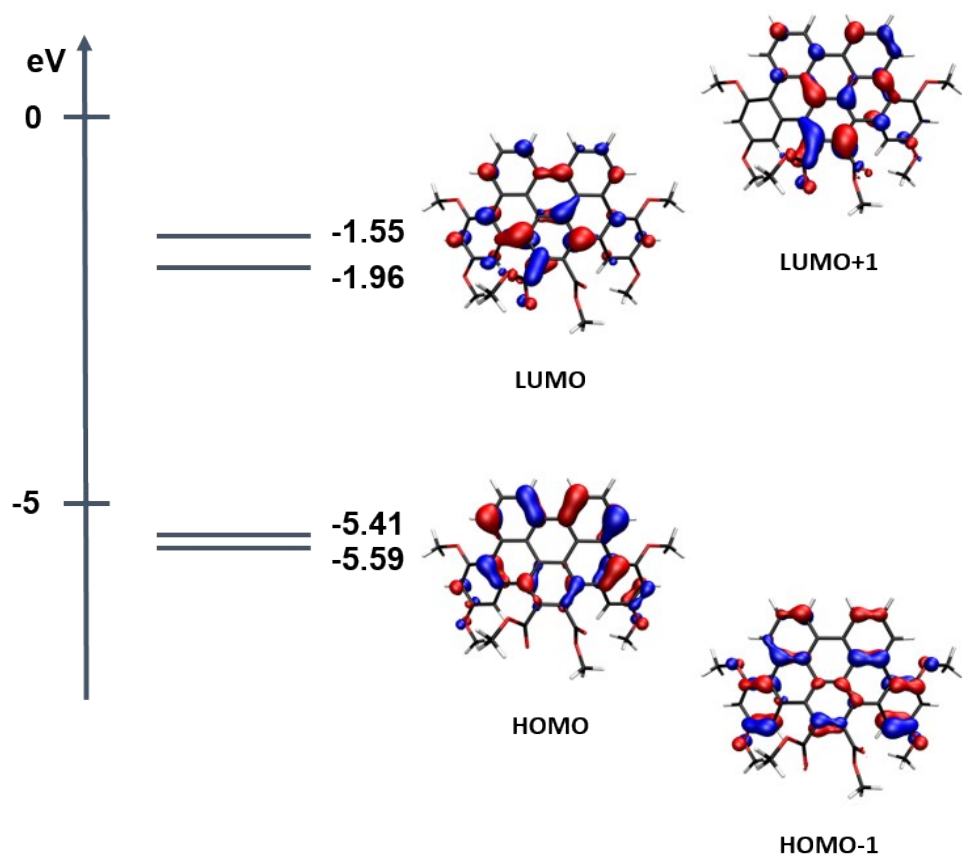

**Figure S30.** view of the optimized geometry of **6planar** at the B3LYP/6-31+G\* level

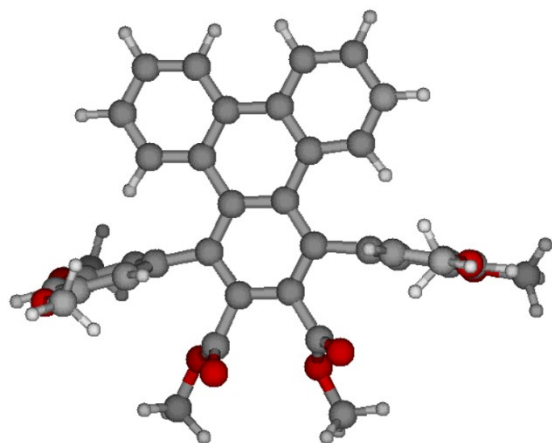

**Figure S31.** view of the optimized geometry of **7planar** at the B3LYP/6-31+G\* level



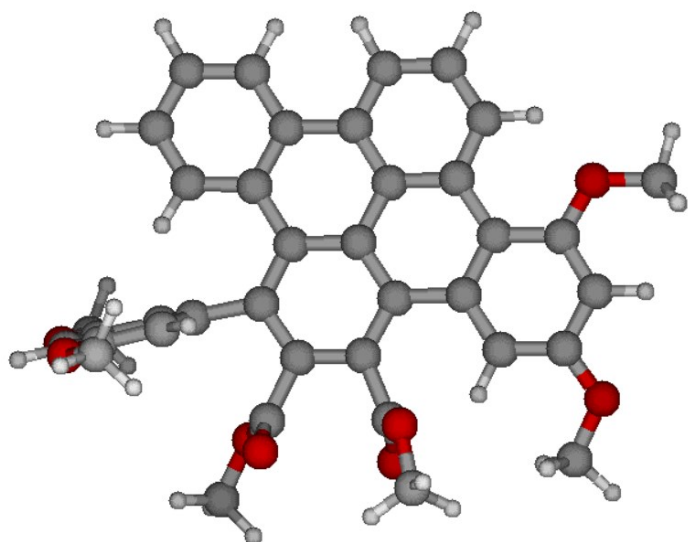

**Figure S32.** view of the optimized geometry of **8planar** at the B3LYP/6-31+G\* level

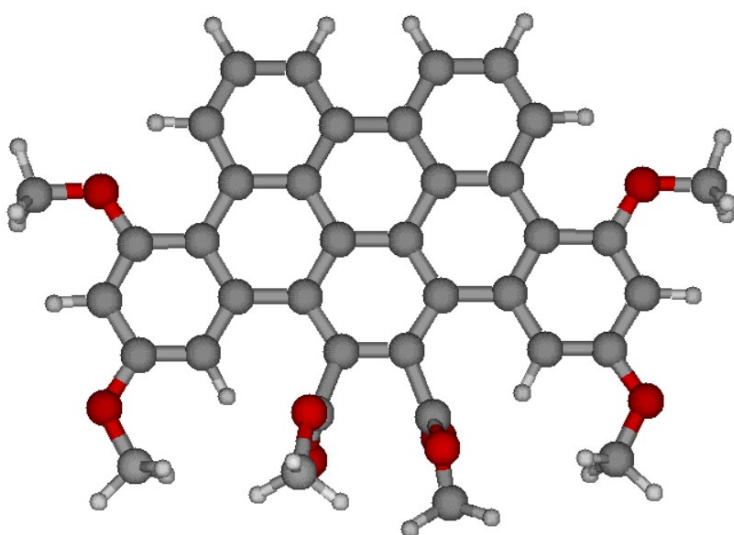

**Figure S33.** view of the optimized geometry of **8twisted** at the B3LYP/6-31+G\* level

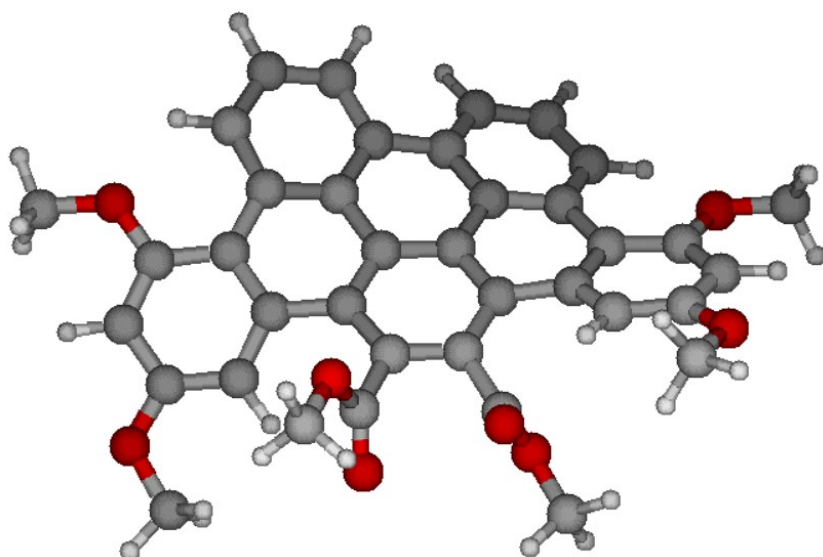

**Figure S34.** DFT optimized structure of **7** (top and side view)

**7** possesses a negative curvature with angles between peripheral benzene ring (red and orange in **Fig. S11**) of  $142.9^\circ$  ( $140.6^\circ$  from the X-ray data) and angles between the two central rings (blue and green) of  $28.4^\circ$  ( $22.2^\circ$  from the X-ray data) in the opposite direction.

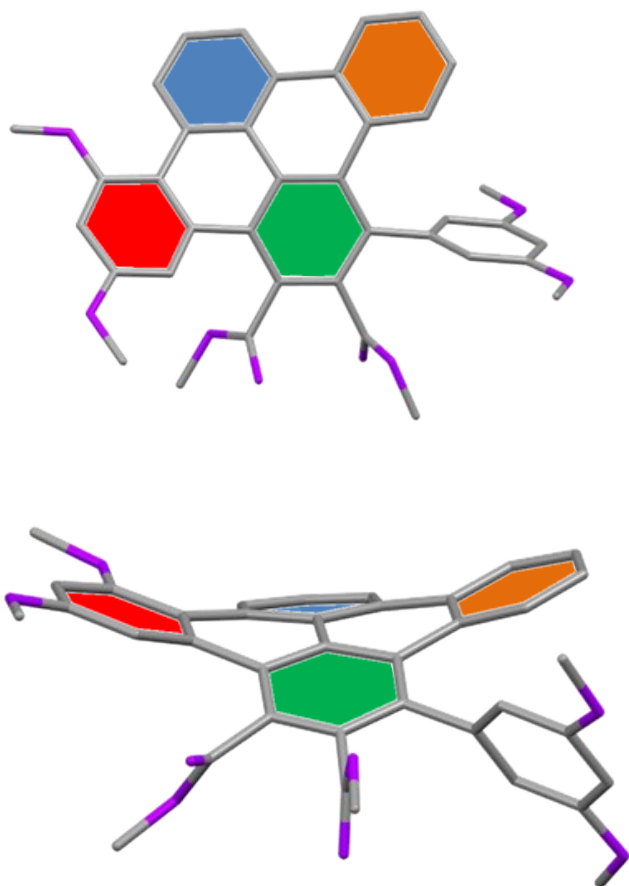

**Table S2.** Energy in eV of the orbitals of **6**, **6planar**, **7**, **7 planar**, **8** and **8planar** at the B3LYP/6-31+G\* level

| Orbitals | <b>6</b> | <b>6planar</b> | <b>7</b> | <b>7planar</b> | <b>8</b> | <b>8planar</b> |
|----------|----------|----------------|----------|----------------|----------|----------------|
| LUMO+2   | -1.13    | -1.11          | -1.10    | -1.08          | -1.07    | -1.02          |
| LUMO+1   | -1.66    | -1.47          | -1.44    | -1.37          | -1.55    | -1.46          |
| LUMO     | -1.68    | -1.54          | -1.85    | -1.77          | -1.96    | -1.84          |
| HOMO     | -5.98    | -5.96          | -5.62    | -5.58          | -5.41    | -5.38          |
| HOMO-1   | -5.99    | -6.09          | -5.91    | -5.92          | -5.59    | -5.57          |
| HOMO-2   | -6.10    | -6.11          | -6.05    | -6.09          | -5.83    | -5.84          |
| HOMO-3   | -6.18    | -6.23          | -6.17    | -6.29          | -6.48    | -6.48          |
| HOMO-4   | -6.32    | -6.34          | -6.42    | -6.31          | -6.59    | -6.62          |

**TableS3.** Calculated energy differences in kcal/mol of the planar structures or twisted structures compared to the contorted structures (minima) at different levels of theory

| B3LYP/6-31+G*                   | $\Delta E$ [kcal/mol] |
|---------------------------------|-----------------------|
| <b>6 vs. 6planar</b> (NImag=3)  | 9.6                   |
| <b>7 vs. 7planar</b> (NImag=4)  | 10.4                  |
| <b>8 vs. 8planar</b> (NImag=5)  | 11.6                  |
| <b>8 vs. 8twisted</b> (NImag=0) | 0.5                   |
| B3LYPD3/6-31+G*                 | $\Delta E$ [kcal/mol] |
| <b>6 vs. 6planar</b> (NImag=3)  | 9.7                   |
| <b>7 vs. 7planar</b> (NImag=4)  | 9.9                   |
| <b>8 vs. 8planar</b> (NImag=5)  | 10.3                  |
| <b>8 vs. 8twisted</b> (NImag=0) | 0.7                   |

**Figure S35.** Experimental absorption and calculated vertical excitations of **1** at the B3LYP/6-31+G\* level

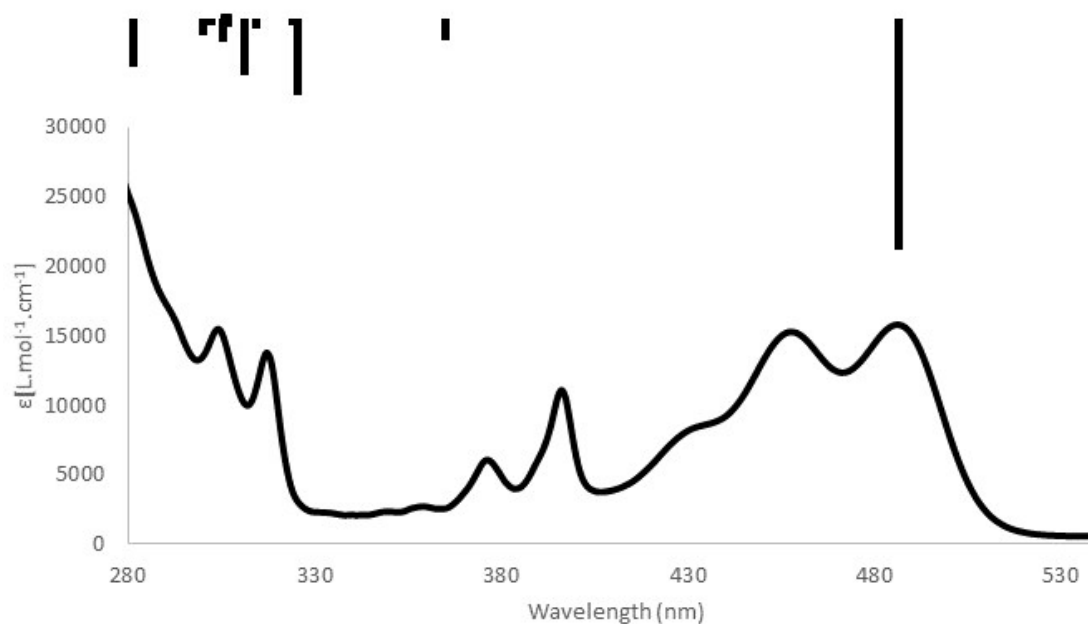

**Figure S36.** Experimental absorption and calculated vertical excitations of **2** at the B3LYP/6-31+G\* level

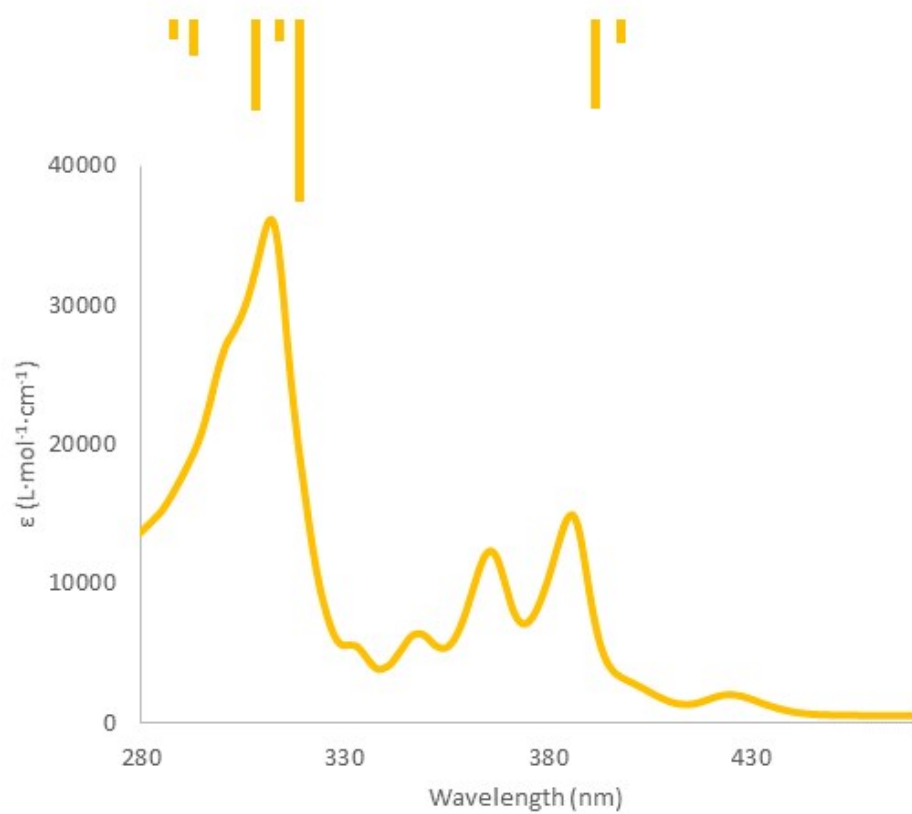

**Figure S37.** Experimental absorption and calculated vertical excitations of **6** at the B3LYP/6-31+G\* level

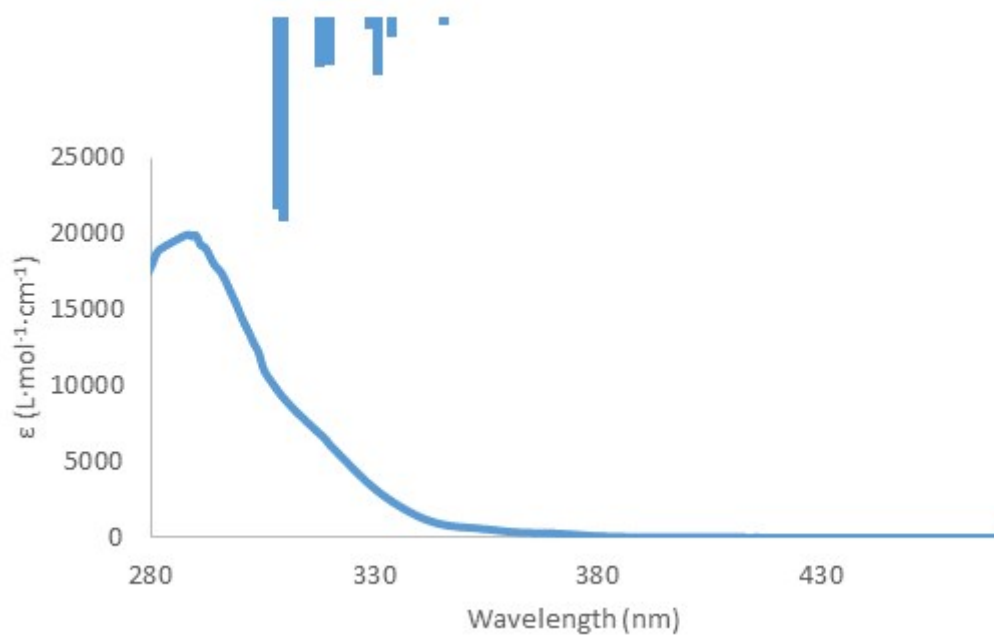

**Figure S38.** Experimental absorption and calculated vertical excitations of **7** at the B3LYP/6-31+G\* level

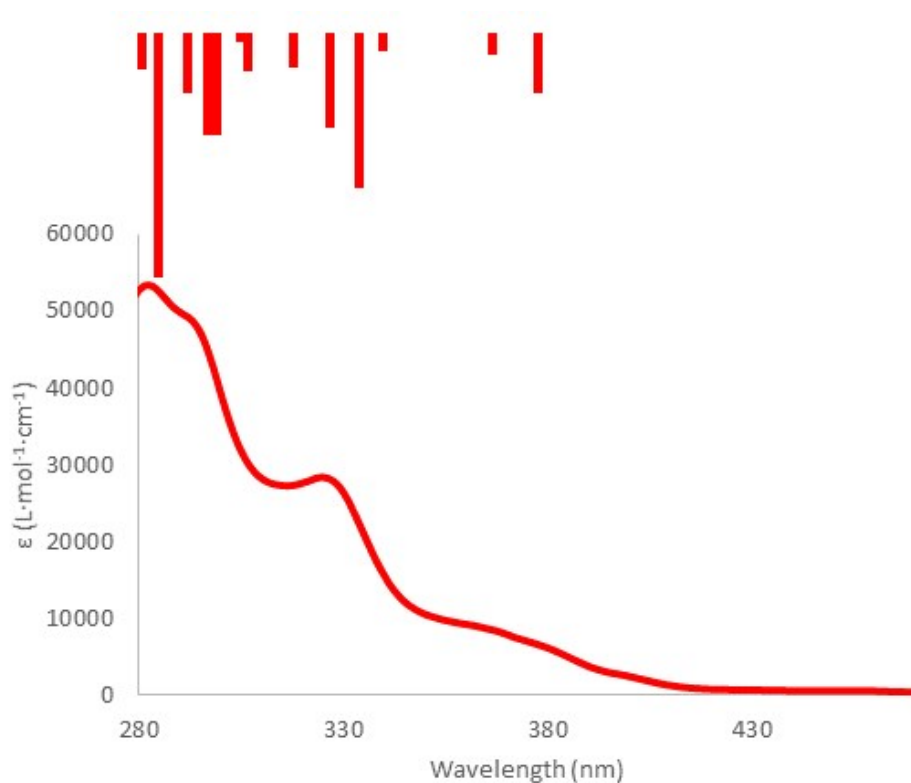

**Figure S39.** Experimental absorption and calculated vertical excitations of **8** at the B3LYP/6-31+G\* level

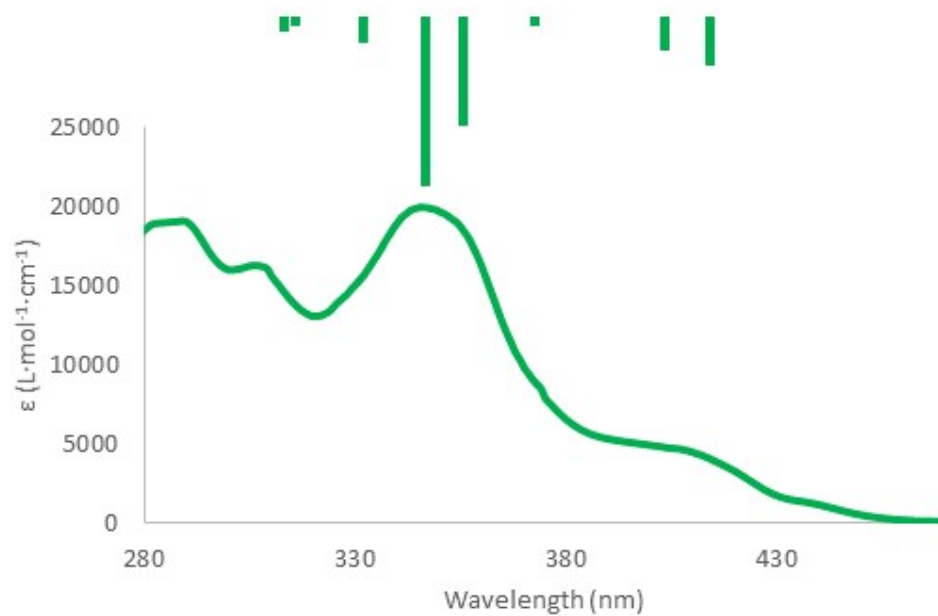

## TD-DFT studies

**Table S4.** Vertical excitation of **1** (B3LYP/6-31+G\*)

| $\lambda_a$<br>(nm) | Intensity | Transition    | Coefficient |
|---------------------|-----------|---------------|-------------|
| 486                 | 0.1955    | HOMO → LUMO   | 0.698       |
| 365                 | 0.0151    | HOMO-1 → LUMO | 0.322       |
|                     |           | HOMO → LUMO+1 | 0.611       |
| 325                 | 0.0630    | HOMO-8 → LUMO | 0.138       |
|                     |           | HOMO-4 → LUMO | -0.259      |
|                     |           | HOMO-2 → LUMO | 0.184       |
|                     |           | HOMO-1 → LUMO | 0.521       |
|                     |           | HOMO → LUMO+1 | -0.276      |
|                     |           | HOMO → LUMO+3 | 0.102       |
| 324                 | 0.0018    | HOMO-7 → LUMO | 0.112       |
|                     |           | HOMO-3 → LUMO | 0.381       |
|                     |           | HOMO → LUMO+2 | 0.542       |
|                     |           | HOMO → LUMO+4 | -0.131      |
|                     |           | HOMO → LUMO+6 | -0.120      |
| 317                 | 0.0000    | HOMO-8 → LUMO | -0.102      |
|                     |           | HOMO-5 → LUMO | 0.486       |
|                     |           | HOMO-2 → LUMO | -0.473      |
|                     |           | HOMO-1 → LUMO | 0.110       |
| 314                 | 0.0042    | HOMO-5 → LUMO | -0.212      |
|                     |           | HOMO-4 → LUMO | 0.321       |
|                     |           | HOMO-2 → LUMO | -0.180      |
|                     |           | HOMO-1 → LUMO | 0.183       |
|                     |           | HOMO → LUMO+3 | 0.527       |
| 311                 | 0.0445    | HOMO-6 → LUMO | 0.232       |
|                     |           | HOMO-3 → LUMO | -0.397      |
|                     |           | HOMO → LUMO+2 | 0.403       |
|                     |           | HOMO → LUMO+4 | 0.178       |
|                     |           | HOMO → LUMO+5 | -0.253      |
|                     |           | HOMO → LUMO+6 | 0.138       |
| 306                 | 0.0019    | HOMO-7 → LUMO | 0.528       |
|                     |           | HOMO-6 → LUMO | -0.354      |
|                     |           | HOMO-3 → LUMO | -0.243      |
|                     |           | HOMO → LUMO+5 | 0.160       |
| 305                 | 0.0159    | HOMO-8 → LUMO | 0.139       |
|                     |           | HOMO-5 → LUMO | -0.191      |
|                     |           | HOMO-4 → LUMO | 0.425       |
|                     |           | HOMO-1 → LUMO | 0.243       |
|                     |           | HOMO → LUMO+1 | -0.114      |
|                     |           | HOMO → LUMO+3 | -0.421      |
| 302                 | 0.0016    | HOMO-8 → LUMO | -0.102      |

|     |        |                 |        |
|-----|--------|-----------------|--------|
|     |        | HOMO-5 → LUMO   | 0.385  |
|     |        | HOMO-4 → LUMO   | 0.365  |
|     |        | HOMO-2 → LUMO   | 0.445  |
| 300 | 0.0104 | HOMO-7 → LUMO   | 0.353  |
|     |        | HOMO-6 → LUMO   | 0.422  |
|     |        | HOMO → LUMO+2   | -0.168 |
|     |        | HOMO → LUMO+4   | -0.330 |
|     |        | HOMO → LUMO+5   | -0.194 |
|     |        | HOMO → LUMO+6   | -0.118 |
| 281 | 0.0380 | HOMO-7 → LUMO   | 0.153  |
|     |        | HOMO-6 → LUMO   | 0.251  |
|     |        | HOMO-3 → LUMO   | 0.113  |
|     |        | HOMO → LUMO+4   | 0.518  |
|     |        | HOMO → LUMO+5   | 0.210  |
|     |        | HOMO → LUMO+6   | -0.246 |
| 278 | 0.0081 | HOMO-8 → LUMO   | 0.646  |
|     |        | HOMO-5 → LUMO   | 0.133  |
|     |        | HOMO → LUMO+1   | 0.130  |
|     |        | HOMO → LUMO+3   | 0.121  |
| 277 | 0.0404 | HOMO-6 → LUMO   | 0.233  |
|     |        | HOMO-3 → LUMO+1 | 0.101  |
|     |        | HOMO → LUMO+4   | -0.148 |
|     |        | HOMO → HOMO+5   | 0.500  |
|     |        | HOMO → HOMO+6   | 0.374  |
| 262 | 0.3525 | HOMO-7 → LUMO   | 0.188  |
|     |        | HOMO-6 → LUMO+1 | -0.202 |
|     |        | HOMO-3 → LUMO   | 0.285  |
|     |        | HOMO-1 → LUMO+5 | 0.106  |
|     |        | HOMO → LUMO+4   | 0.185  |
|     |        | HOMO → LUMO+5   | -0.208 |
|     |        | HOMO → LUMO+6   | 0.475  |

**Table S5.** Vertical emission of **1** (B3LYP/6-31+G\*)

| $\lambda_c$<br>(nm) | Intensity | Transition  | Coefficient |
|---------------------|-----------|-------------|-------------|
| 575                 | 0.1735    | HOMO ← LUMO | 0.701       |

**Table S6.** Vertical excitation of **2** (B3LYP/6-31+G\*)



| $\lambda_a$<br>(nm) | Intensity | Transition      | Coefficient |
|---------------------|-----------|-----------------|-------------|
| 398                 | 0.0384    | HOMO-1 → LUMO   | -0.319      |
|                     |           | HOMO → LUMO+1   | 0.627       |
| 392                 | 0.1767    | HOMO-1 → LUMO+1 | 0.170       |
|                     |           | HOMO → LUMO     | 0.681       |
| 319                 | 0.3704    | HOMO-1 → LUMO   | 0.593       |
|                     |           | HOMO → LUMO+1   | 0.301       |
|                     |           | HOMO → LUMO+4   | 0.152       |
| 314                 | 0.0335    | HOMO-2 → LUMO   | -0.161      |
|                     |           | HOMO-1 → LUMO+1 | -0.308      |
|                     |           | HOMO → LUMO+2   | 0.596       |
|                     |           | HOMO → LUMO+3   | -0.115      |
| 308                 | 0.1807    | HOMO-2 → LUMO   | -0.366      |
|                     |           | HOMO-1 → LUMO+1 | 0.541       |
|                     |           | HOMO → LUMO     | -0.125      |
|                     |           | HOMO → LUMO+2   | 0.175       |
| 293                 | 0.0655    | HOMO-2 → LUMO   | -0.446      |
|                     |           | HOMO-1 → LUMO+1 | -0.178      |
|                     |           | HOMO → LUMO+2   | -0.134      |
|                     |           | HOMO → LUMO+3   | 0.479       |
| 288                 | 0.0304    | HOMO-4 → LUMO   | -0.328      |
|                     |           | HOMO-2 → LUMO   | 0.345       |
|                     |           | HOMO-1 → LUMO+1 | 0.141       |
|                     |           | HOMO → LUMO+2   | 0.226       |
|                     |           | HOMO → LUMO+3   | 0.436       |
| 277                 | 0.0212    | HOMO-3 → LUMO   | 0.592       |
|                     |           | HOMO-2 → LUMO+1 | 0.283       |
|                     |           | HOMO → LUMO+4   | 0.215       |
| 276                 | 0.0043    | HOMO-3 → LUMO   | -0.131      |
|                     |           | HOMO-2 → LUMO+1 | 0.565       |
|                     |           | HOMO-1 → LUMO+2 | -0.123      |
|                     |           | HOMO → LUMO+4   | -0.345      |
| 267                 | 0.0175    | HOMO-5 → LUMO   | 0.112       |
|                     |           | HOMO-4 → LUMO+1 | -0.350      |
|                     |           | HOMO-3 → LUMO   | -0.172      |
|                     |           | HOMO-1 → LUMO+2 | -0.294      |
|                     |           | HOMO-1 → LUMO+3 | 0.215       |
|                     |           | HOMO → LUMO+4   | 0.409       |
| 266                 | 0.0709    | HOMO-5 → LUMO+1 | 0.127       |
|                     |           | HOMO-4 → LUMO   | -0.261      |
|                     |           | HOMO-3 → LUMO+1 | 0.575       |
|                     |           | HOMO-1 → LUMO+1 | -0.119      |
|                     |           | HOMO → LUMO+2   | -0.148      |
|                     |           | HOMO → LUMO+7   | -0.124      |
| 263                 | 0.0174    | HOMO-4 → LUMO+1 | -0.355      |

|     |        |                 |        |
|-----|--------|-----------------|--------|
|     |        | HOMO-3 → LUMO   | 0.142  |
|     |        | HOMO-1 → LUMO+2 | 0.399  |
|     |        | HOMO-1 → LUMO+3 | 0.187  |
|     |        | HOMO → LUMO+4   | -0.145 |
|     |        | HOMO → LUMO+5   | 0,328  |
| 260 | 0.0001 | HOMO-6 → LUMO   | 0.120  |
|     |        | HOMO-5 → LUMO+1 | 0.413  |
|     |        | HOMO-4 → LUMO   | 0.425  |
|     |        | HOMO-3 → LUMO+1 | 0.176  |
|     |        | HOMO → LUMO+2   | 0.104  |
|     |        | HOMO → LUMO+3   | 0.149  |
|     |        | HOMO → LUMO+7   | 0.150  |
| 257 | 0.0629 | HOMO-6 → LUMO+1 | 0.139  |
|     |        | HOMO-5 → LUMO   | 0.233  |
|     |        | HOMO-4 → LUMO+1 | 0.315  |
|     |        | HOMO-1 → LUMO   | -0.117 |
|     |        | HOMO-1 → LUMO+3 | -0.146 |
|     |        | HOMO → LUMO+4   | 0.127  |
|     |        | HOMO → LUMO+5   | 0.511  |
| 252 | 0.0057 | HOMO-5 → LUMO+1 | 0.480  |
|     |        | HOMO-4 → LUMO   | -0.302 |
|     |        | HOMO-3 → LUMO+2 | -0.280 |
|     |        | HOMO-1 → LUMO+3 | -0.210 |
|     |        | HOMO → LUMO+5   | -0.100 |
| 251 | 0.0001 | HOMO-6 → LUMO+1 | 0.283  |
|     |        | HOMO-5 → LUMO   | 0.524  |
|     |        | HOMO-1 → LUMO+2 | 0.121  |
|     |        | HOMO-1 → LUMO+3 | 0.109  |
|     |        | HOMO → LUMO+5   | -0.254 |
| 245 | 0.1021 | HOMO-6 → LUMO+1 | -0.300 |
|     |        | HOMO-5 → LUMO   | 0.240  |
|     |        | HOMO-3 → LUMO   | 0.106  |
|     |        | HOMO-1 → LUMO+2 | -0.229 |
|     |        | HOMO → LUMO+4   | -0.149 |
|     |        | HOMO → LUMO+6   | 0.400  |
|     |        | HOMO → LUMO+8   | -0.247 |
| 244 | 0.0756 | HOMO-6 → LUMO+1 | 0.284  |
|     |        | HOMO-5 → LUMO   | -0.259 |
|     |        | HOMO-1 → LUMO+2 | 0.145  |
|     |        | HOMO-1 → LUMO+3 | 0.158  |
|     |        | HOMO → LUMO+4   | 0.107  |
|     |        | HOMO → LUMO+6   | .0415  |
|     |        | HOMO → LUMO+8   | -0.297 |
| 244 | 0.0194 | HOMO-6 → LUMO   | -0.126 |
|     |        | HOMO-4 → LUMO   | -0.102 |
|     |        | HOMO-3 → LUMO+1 | 0.100  |

|     |        |        |   |        |        |
|-----|--------|--------|---|--------|--------|
|     |        | HOMO-1 | → | LUMO+4 | -0.181 |
|     |        | HOMO   | → | LUMO+7 | 0.637  |
| 243 | 0.0235 | HOMO-4 | → | LUMO+1 | 0.206  |
|     |        | HOMO-3 | → | LUMO   | 0.160  |
|     |        | HOMO-2 | → | LUMO+1 | -0.190 |
|     |        | HOMO-1 | → | LUMO+2 | -0.244 |
|     |        | HOMO-1 | → | LUMO+3 | 0.508  |
|     |        | HOMO   | → | LUMO+4 | -0.147 |

**Table S7.** Vertical emission of **2** (B3LYP/6-31+G\*)

| $\lambda_e$<br>(nm) | Intensity | Transition |          | Coefficient |
|---------------------|-----------|------------|----------|-------------|
| 435                 | 0.2195    | HOMO-1     | ← LUMO+1 | 0.112       |
|                     |           | HOMO       | ← LUMO   | 0.693       |

**Table S8.** Vertical excitation of **6** (B3LYP/6-31+G\*)

| $\lambda_a$<br>(nm) | Intensity | Transition |          | Coefficient |
|---------------------|-----------|------------|----------|-------------|
| 346                 | 0.0024    | HOMO-5     | → LUMO   | 0.100       |
|                     |           | HOMO-3     | → LUMO   | 0.182       |
|                     |           | HOMO-2     | → LUMO   | 0.301       |
|                     |           | HOMO-2     | → LUMO+1 | 0.210       |
|                     |           | HOMO-1     | → LUMO   | -0.223      |
|                     |           | HOMO-1     | → LUMO+1 | 0.475       |
|                     |           | HOMO       | → LUMO   | -0.162      |
| 334                 | 0.0103    | HOMO-2     | → LUMO+1 | 0.103       |
|                     |           | HOMO-1     | → LUMO   | -0.287      |
|                     |           | HOMO       | → LUMO   | 0.515       |
|                     |           | HOMO       | → LUMO+1 | -0.358      |
| 331                 | 0.0398    | HOMO-2     | → LUMO   | 0.188       |
|                     |           | HOMO-2     | → LUMO+1 | -0.242      |
|                     |           | HOMO-1     | → LUMO   | 0.394       |
|                     |           | HOMO-1     | → LUMO+1 | 0.278       |
|                     |           | HOMO       | → LUMO   | 0.369       |
|                     |           | HOMO       | → LUMO+1 | 0.112       |
| 329                 | 0.0046    | HOMO-2     | → LUMO+1 | 0.163       |
|                     |           | HOMO-1     | → LUMO   | -0.223      |
|                     |           | HOMO       | → LUMO   | 0.237       |
|                     |           | HOMO       | → LUMO+1 | 0.592       |
| 320                 | 0.0318    | HOMO-4     | → LUMO+1 | 0.122       |
|                     |           | HOMO-3     | → LUMO   | -0.315      |
|                     |           | HOMO-3     | → LUMO+1 | -0.360      |
|                     |           | HOMO-2     | → LUMO   | 0.435       |

|                 |        |                 |        |
|-----------------|--------|-----------------|--------|
|                 |        | HOMO-1 → LUMO+1 | -0.205 |
| 318             | 0.0336 | HOMO-4 → LUMO   | -0.121 |
|                 |        | HOMO-3 → LUMO   | 0.340  |
|                 |        | HOMO-3 → LUMO+1 | -0.270 |
|                 |        | HOMO-2 → LUMO   | -0.130 |
|                 |        | HOMO-2 → LUMO+1 | 0.419  |
|                 |        | HOMO-1 → LUMO   | 0.270  |
|                 |        | HOMO-1 → LUMO+1 | -0.121 |
| 310             | 0.149  | HOMO-5 → LUMO   | -0.131 |
|                 |        | HOMO-4 → LUMO   | 0.107  |
|                 |        | HOMO-4 → LUMO+1 | 0.383  |
|                 |        | HOMO-3 → LUMO   | 0.382  |
|                 |        | HOMO-3 → LUMO+1 | 0.122  |
|                 |        | HOMO-2 → LUMO   | 0.176  |
|                 |        | HOMO-2 → LUMO+1 | -0.218 |
| HOMO-1 → LUMO+1 | -0.248 |                 |        |
| 309             | 0.1375 | HOMO-4 → LUMO   | -0.352 |
|                 |        | HOMO-4 → LUMO+1 | 0.212  |
|                 |        | HOMO-3 → LUMO   | -0.198 |
|                 |        | HOMO-3 → LUMO+1 | 0.423  |
|                 |        | HOMO-2 → LUMO   | 0.116  |
|                 |        | HOMO-2 → LUMO+1 | 0.154  |
|                 |        | HOMO-1 → LUMO   | 0.228  |

**Table S9.** Vertical emission of **6** (B3LYP/6-31+G\*)

| $\lambda_c$<br>(nm) | Intensity | Transition  | Coefficient |
|---------------------|-----------|-------------|-------------|
| 472                 | 0.0288    | HOMO ← LUMO | -0.703      |

**Table S10.** Vertical excitation of **7** (B3LYP/6-31+G\*)

| $\lambda_a$<br>(nm) | Intensity | Transition      | Coefficient |
|---------------------|-----------|-----------------|-------------|
| 378                 | 0.0751    | HOMO-1 → LUMO   | 0.212       |
|                     |           | HOMO-1 → LUMO+1 | 0.164       |
|                     |           | HOMO → LUMO     | 0.637       |
| 367                 | 0.0233    | HOMO-1 → LUMO   | 0.477       |
|                     |           | HOMO → LUMO     | -0.216      |
|                     |           | HOMO → LUMO+1   | -0.444      |
| 341                 | 0.0181    | HOMO-2 → LUMO   | 0.674       |
|                     |           | HOMO-1 → LUMO+1 | -0.147      |
| 334                 | 0.2038    | HOMO-3 → LUMO   | 0.387       |
|                     |           | HOMO-2 → LUMO   | -0.174      |
|                     |           | HOMO-1 → LUMO   | -0.371      |

|     |        |                 |          |
|-----|--------|-----------------|----------|
|     |        | HOMO-1 → LUMO+1 | 0.100    |
|     |        | HOMO → LUMO+1   | -0.372   |
| 327 | 0.1227 | HOMO-3 → LUMO   | 0.482    |
|     |        | HOMO-1 → LUMO   | 0.182    |
|     |        | HOMO-1 → LUMO+1 | 0.207    |
|     |        | HOMO → LUMO+2   | -0.119   |
|     |        | HOMO → LUMO+1   | 0.331    |
|     |        | HOMO → LUMO+2   | 0.168    |
| 318 | 0.0406 | HOMO-4 → LUMO   | -0.36375 |
|     |        | HOMO-3 → LUMO   | -0.28942 |
|     |        | HOMO-1 → LUMO+1 | 0.44083  |
|     |        | HOMO → LUMO+2   | 0.26312  |
| 307 | 0.0449 | HOMO-5 → LUMO   | -0.308   |
|     |        | HOMO-3 → LUMO+1 | 0.150    |
|     |        | HOMO-2 → LUMO+1 | 0.265    |
|     |        | HOMO-1 → LUMO+1 | -0.171   |
|     |        | HOMO-1 → LUMO+2 | 0.181    |
|     |        | HOMO → LUMO+2   | 0.450    |
| 305 | 0.0064 | HOMO-5 → LUMO   | 0.167    |
|     |        | HOMO-4 → LUMO   | -0.168   |
|     |        | HOMO-2 → LUMO+1 | 0.630    |
|     |        | HOMO → LUMO+2   | -0.158   |
| 299 | 0.1323 | HOMO-4 → LUMO   | 0.504    |
|     |        | HOMO-3 → LUMO+1 | -0.252   |
|     |        | HOMO-2 → LUMO+1 | 0.129    |
|     |        | HOMO-1 → LUMO+1 | 0.311    |
|     |        | HOMO → LUMO+3   | 0.109    |
| 296 | 0.1333 | HOMO-5 → LUMO   | 0.335    |
|     |        | HOMO-4 → LUMO   | 0.157    |
|     |        | HOMO-3 → LUMO+1 | 0.559    |
|     |        | HOMO-1 → LUMO+1 | 0.108    |
| 292 | 0.0753 | HOMO-5 → LUMO   | -0.210   |
|     |        | HOMO-4 → LUMO+1 | 0.124    |
|     |        | HOMO-3 → LUMO+1 | 0.152    |
|     |        | HOMO-1 → LUMO+1 | 0.130    |
|     |        | HOMO-1 → LUMO+2 | 0.499    |
|     |        | HOMO → LUMO+2   | -0.274   |
|     |        | HOMO → LUMO+3   | 0.106    |
| 285 | 0.3242 | HOMO-5 → LUMO   | 0.424    |
|     |        | HOMO-4 → LUMO   | -0.101   |
|     |        | HOMO-3 → LUMO+1 | -0.192   |
|     |        | HOMO-1 → LUMO   | -0.187   |
|     |        | HOMO-1 → LUMO+2 | 0.371    |
|     |        | HOMO → LUMO+2   | 0.210    |
| 281 | 0.0435 | HOMO-5 → LUMO+1 | 0.183    |
|     |        | HOMO-4 → LUMO+1 | 0.303    |

|     |        |                  |        |
|-----|--------|------------------|--------|
|     |        | HOMO-1 → LUMO+2  | -0.104 |
|     |        | HOMO → LUMO+3    | 0.551  |
| 279 | 0.0313 | HOMO-6 → LUMO    | -0.257 |
|     |        | HOMO-5 → LUMO+2  | -0.123 |
|     |        | HOMO-4 → LUMO+1  | 0.457  |
|     |        | HOMO-3 → LUMO+2  | -0.122 |
|     |        | HOMO-2 → LUMO+2  | -0.296 |
|     |        | HOMO → LUMO+3    | -0.240 |
| 277 | 0.0333 | HOMO-5 → LUMO+1  | -0.235 |
|     |        | HOMO-4 → LUMO+1  | 0.298  |
|     |        | HOMO-3 → LUMO+2  | 0.128  |
|     |        | HOMO-2 → LUMO+2  | 0.496  |
|     |        | HOMO-1 → LUMO+3  | -0.174 |
| 274 | 0.0067 | HOMO-6 → LUMO    | 0.174  |
|     |        | HOMO-5 → LUMO+1  | -0.302 |
|     |        | HOMO-4 → LUMO+2  | -0.113 |
|     |        | HOMO-3 → LUMO+2  | 0.387  |
|     |        | HOMO-2 → LUMO+2  | -0.359 |
|     |        | HOMO-1 → LUMO+3  | -0.193 |
| 271 | 0.0647 | HOMO-6 → LUMO    | 0.224  |
|     |        | HOMO-3 → LUMO+2  | -0.207 |
|     |        | HOMO → LUMO+3    | -0.136 |
|     |        | HOMO → LUMO+4    | 0.567  |
| 269 | 0.0103 | HOMO-6 → LUMO    | 0.265  |
|     |        | HOMO-5 → LUMO+1  | 0.334  |
|     |        | HOMO-4 → LUMO+1  | 0.183  |
|     |        | HOMO-3 → LUMO+2  | 0.296  |
|     |        | HOMO-1 → LUMO+3  | 0.301  |
|     |        | HOMO → LUMO+3    | -0.200 |
| 269 | 0.0185 | HOMO-6 → LUMO    | 0.406  |
|     |        | HOMO-3 → LUMO+2  | -0.368 |
|     |        | HOMO-2 → LUMO+4  | -0.322 |
|     |        | HOMO → LUMO+5    | 0.122  |
| 261 | 0.0088 | HOMO-5 → LUMO+1  | -0.172 |
|     |        | HOMO-4 → LUMO+2  | 0.308  |
|     |        | HOMO-3 → LUMO+4  | -0.119 |
|     |        | HOMO-3 → LUMO+13 | -0.112 |
|     |        | HOMO-2 → LUMO+4  | 0.461  |
|     |        | HOMO-1 → LUMO+3  | 0.100  |
|     |        | HOMO → LUMO+6    | 0.188  |

**Table S11.** Vertical emission of **7** (B3LYP/6-31+G\*)

| $\lambda_e$<br>(nm) | Intensity | Transition    | Coefficient |
|---------------------|-----------|---------------|-------------|
| 602                 | 0.0335    | HOMO-1 ← LUMO | 0.129       |
|                     |           | HOMO ← LUMO   | 0.691       |

**Table S12.** Vertical excitation of **8** (B3LYP/6-31+G\*)

| $\lambda_a$<br>(nm) | Intensity | Transition      | Coefficient |
|---------------------|-----------|-----------------|-------------|
| 415                 | 0.1044    | HOMO-1 → LUMO   | 0.309       |
|                     |           | HOMO-1 → LUMO+1 | -0.142      |
|                     |           | HOMO → LUMO     | 0.572       |
|                     |           | HOMO → LUMO+1   | 0.211       |
| 404                 | 0.066     | HOMO-1 → LUMO   | 0.509       |
|                     |           | HOMO → LUMO     | -0.360      |
|                     |           | HOMO → LUMO+1   | 0.282       |
| 373                 | 0.0101    | HOMO-2 → LUMO   | 0.643       |
|                     |           | HOMO-1 → LUMO+1 | 0.230       |
|                     |           | HOMO → LUMO+2   | -0.137      |
| 356                 | 0.2468    | HOMO-3 → LUMO   | -0.180      |
|                     |           | HOMO-2 → LUMO+1 | 0.169       |
|                     |           | HOMO-1 → LUMO   | -0.298      |
|                     |           | HOMO-1 → LUMO+1 | -0.179      |
|                     |           | HOMO → LUMO+1   | 0.540       |
| 347                 | 0.3885    | HOMO-2 → LUMO   | -0.196      |
|                     |           | HOMO-2 → LUMO+1 | 0.134       |
|                     |           | HOMO-1 → LUMO+1 | 0.603       |
|                     |           | HOMO → LUMO     | 0.155       |
|                     |           | HOMO → LUMO+1   | 0.141       |
| 332                 | 0.0498    | HOMO-5 → LUMO   | 0.122       |
|                     |           | HOMO-3 → LUMO   | 0.170       |
|                     |           | HOMO-2 → LUMO+1 | 0.603       |
|                     |           | HOMO-1 → LUMO   | 0.142       |
|                     |           | HOMO-1 → LUMO+1 | -0.102      |
|                     |           | HOMO → LUMO+2   | 0.188       |
| 316                 | 0.0081    | HOMO-4 → LUMO   | 0.240       |
|                     |           | HOMO-3 → LUMO   | -0.125      |
|                     |           | HOMO-2 → LUMO   | 0.131       |
|                     |           | HOMO-2 → LUMO+1 | -0.144      |
|                     |           | HOMO → LUMO+2   | 0.599       |
| 313                 | 0.0215    | HOMO-5 → LUMO   | -0.148      |
|                     |           | HOMO-3 → LUMO   | 0.384       |

|  |  |        |   |        |        |
|--|--|--------|---|--------|--------|
|  |  | HOMO-2 | → | LUMO+1 | -0.114 |
|  |  | HOMO-1 | → | LUMO+2 | 0.506  |
|  |  | HOMO   | → | LUMO+2 | 0.124  |

**Table S13.** Vertical emission of **8** (B3LYP/6-31+G\*)

| $\lambda_e$<br>(nm) | Intensity | Transition |   |      | Coefficient |
|---------------------|-----------|------------|---|------|-------------|
| 521                 | 0.1078    | HOMO-1     | ← | LUMO | -0.123      |
|                     |           | HOMO       | ← | LUMO | -0.683      |

**Table S14.** Vertical excitation of **8twisted** (B3LYP/6-31+G\*)

| $\lambda_a$<br>(nm) | Intensity | Transition |   |        | Coefficient |
|---------------------|-----------|------------|---|--------|-------------|
| 399                 | 0.0066    | HOMO-2     | → | LUMO+1 | -0.106      |
|                     |           | HOMO-1     | → | LUMO   | 0.538       |
|                     |           | HOMO       | → | LUMO+1 | 0.433       |
| 389                 | 0.0626    | HOMO-1     | → | LUMO+1 | -0.298      |
|                     |           | HOMO       | → | LUMO+1 | 0.631       |
| 362                 | 0.1162    | HOMO-2     | → | LUMO   | 0.393       |
|                     |           | HOMO-1     | → | LUMO+1 | 0.522       |
|                     |           | HOMO       | → | LUMO   | 0.222       |
|                     |           | HOMO       | → | LUMO+2 | -0.120      |
| 354                 | 0.1869    | HOMO-3     | → | LUMO   | 0.109       |
|                     |           | HOMO-2     | → | LUMO+1 | 0.292       |
|                     |           | HOMO-1     | → | LUMO   | -0.357      |
|                     |           | HOMO       | → | LUMO+1 | 0.506       |
| 345                 | 0.4302    | HOMO-2     | → | LUMO   | 0.525       |
|                     |           | HOMO-1     | → | LUMO+1 | -0.359      |
|                     |           | HOMO       | → | LUMO   | -0.188      |
|                     |           | HOMO       | → | LUMO+2 | -0.191      |
| 328                 | 0.1224    | HOMO-5     | → | LUMO   | -0.108      |
|                     |           | HOMO-3     | → | LUMO   | -0.174      |
|                     |           | HOMO-2     | → | LUMO+2 | 0.604       |
|                     |           | HOMO-1     | → | LUMO+1 | 0.240       |
|                     |           | HOMO       | → | LUMO+1 | -0.125      |
| 311                 | 0.0096    | HOMO-5     | → | LUMO   | 0.111       |
|                     |           | HOMO-4     | → | LUMO+2 | -0.117      |
|                     |           | HOMO-3     | → | LUMO+1 | -0.206      |
|                     |           | HOMO-1     | → | LUMO+2 | 0.640       |
| 311                 | 0.1038    | HOMO-4     | → | LUMO   | 0.159       |
|                     |           | HOMO-2     | → | LUMO   | 0.216       |
|                     |           | HOMO       | → | LUMO+2 | 0.630       |
| 297                 | 0.1256    | HOMO-4     | → | LUMO+1 | -0.180      |



|     |        |                 |        |
|-----|--------|-----------------|--------|
|     |        | HOMO-3 → LUMO   | 0.564  |
|     |        | HOMO-2 → LUMO+1 | 0.116  |
|     |        | HOMO-2 → LUMO+4 | -0.119 |
|     |        | HOMO-1 → LUMO+2 | 0.142  |
|     |        | HOMO-1 → LUMO+3 | -0.195 |
|     |        | HOMO → LUMO+1   | -0.156 |
|     |        | HOMO → LUMO+6   | -0.103 |
| 297 | 0.0279 | HOMO-4 → LUMO   | 0.595  |
|     |        | HOMO-2 → LUMO   | -0.104 |
|     |        | HOMO-2 → LUMO+2 | 0.213  |
|     |        | HOMO-1 → LUMO+4 | 0.119  |
|     |        | HOMO → LUMO+3   | -0.240 |
| 295 | 0.0018 | HOMO-4 → LUMO   | 0.177  |
|     |        | HOMO-3 → LUMO+1 | 0.304  |
|     |        | HOMO-2 → LUMO+2 | 0.126  |
|     |        | HOMO → LUMO+3   | 0.580  |
| 288 | 0.0412 | HOMO-5 → LUMO   | 0.315  |
|     |        | HOMO-4 → LUMO+1 | 0.356  |
|     |        | HOMO-3 → LUMO   | 0.168  |
|     |        | HOMO-2 → LUMO+3 | 0.455  |
| 286 | 0.2225 | HOMO-5 → LUMO+1 | 0.160  |
|     |        | HOMO-4 → LUMO   | -0.228 |
|     |        | HOMO-2 → LUMO+2 | 0.605  |
|     |        | HOMO → LUMO+2   | 0.116  |
| 285 | 0.0064 | HOMO-5 → LUMO   | 0.549  |
|     |        | HOMO-4 → LUMO+1 | -0.236 |
|     |        | HOMO-3 → LUMO   | -0.179 |
|     |        | HOMO-1 → LUMO+2 | -0.162 |
|     |        | HOMO-1 → LUMO+3 | -0.116 |
|     |        | HOMO → LUMO+5   | 0.195  |
| 281 | 0.0742 | HOMO-5 → LUMO+1 | -0.226 |
|     |        | HOMO-4 → LUMO+2 | 0.114  |
|     |        | HOMO-3 → LUMO+1 | 0.489  |
|     |        | HOMO-2 → LUMO+2 | 0.157  |
|     |        | HOMO-1 → LUMO+4 | -0.308 |
|     |        | HOMO → LUMO+3   | -0.211 |
| 277 | 0.1256 | HOMO-5 → LUMO+1 | 0.577  |
|     |        | HOMO-3 → LUMO+1 | 0.249  |
|     |        | HOMO-2 → LUMO+2 | -0.138 |
|     |        | HOMO-2 → LUMO+3 | 0.138  |
|     |        | HOMO → LUMO+3   | -0.134 |
| 276 | 0.0112 | HOMO-4 → LUMO+1 | -0.353 |
|     |        | HOMO-1 → LUMO+3 | 0.289  |
|     |        | HOMO → LUMO+4   | 0.494  |
| 271 | 0.0258 | HOMO-4 → LUMO+1 | 0.306  |
|     |        | HOMO-3 → LUMO   | -0.104 |

|     |        |        |   |        |        |
|-----|--------|--------|---|--------|--------|
|     |        | HOMO-2 | → | LUMO+4 | -0.185 |
|     |        | HOMO-1 | → | LUMO+3 | -0.248 |
|     |        | HOMO-1 | → | LUMO+7 | 0.145  |
|     |        | HOMO   | → | LUMO+4 | 0.400  |
|     |        | HOMO   | → | LUMO+5 | 0.261  |
| 268 | 0.0081 | HOMO-5 | → | LUMO+1 | -0.158 |
|     |        | HOMO-1 | → | LUMO+4 | 0.205  |
|     |        | HOMO-1 | → | LUMO+5 | 0.127  |
|     |        | HOMO-1 | → | LUMO+6 | 0.558  |
|     |        | HOMO   | → | LUMO+7 | -0.249 |
| 267 | 0.0008 | HOMO-4 | → | LUMO+1 | -0.105 |
|     |        | HOMO-3 | → | LUMO+2 | -0.147 |
|     |        | HOMO-2 | → | LUMO+4 | -0.182 |
|     |        | HOMO-1 | → | LUMO+3 | 0.117  |
|     |        | HOMO-1 | → | LUMO+7 | -0.195 |
|     |        | HOMO   | → | LUMO+4 | -0.136 |
|     |        | HOMO   | → | LUMO+5 | 0.441  |
|     |        | HOMO   | → | LUMO+6 | 0.374  |

**Table S15.** Vertical emission of **8**twisted (B3LYP/6-31+G\*)

| $\lambda_c$<br>(nm) | Intensity | Transition |          | Coefficient |
|---------------------|-----------|------------|----------|-------------|
| 426                 | 0.0035    | HOMO-1     | ← LUMO   | 0.523       |
|                     |           | HOMO       | ← LUMO+1 | 0.455       |

**Table S16.** Excitation energies and oscillator strengths of **2** at the ADC2/cc-pVDZ//B3LYP/6-31+G\* level

| Excited state | Excitation energy [eV] | Absorption wavelength [nm] | Oscillator strength |
|---------------|------------------------|----------------------------|---------------------|
| 1             | 3.3029                 | 375.38                     | 0.0229488           |
| 2             | 3.5854                 | 345.80                     | 0.2232030           |
| 3             | 4.1893                 | 295.96                     | 0.0037308           |
| 4             | 4.2973                 | 288.52                     | 0.4774374           |
| 5             | 4.4829                 | 276.57                     | 0.1966586           |
| 6             | 4.4829                 | 276.57                     | 0.1939643           |
| 7             | 4.7346                 | 261.87                     | 0.0323450           |
| 8             | 4.7856                 | 259.08                     | 0.0010719           |
| 9             | 5.1472                 | 240.88                     | 0.0407644           |

**Table S17.** NICS indices for calculated geometries of **1**, **2**, **6**, **7** and **8** at the B3LYP/6-311+G\*\*/B3LYP/6-31+G\* level. The NICS(-1) and NICS(1) values correspond to the direction depicted on stick representation, the NICS(1) value is calculated above the PAH.

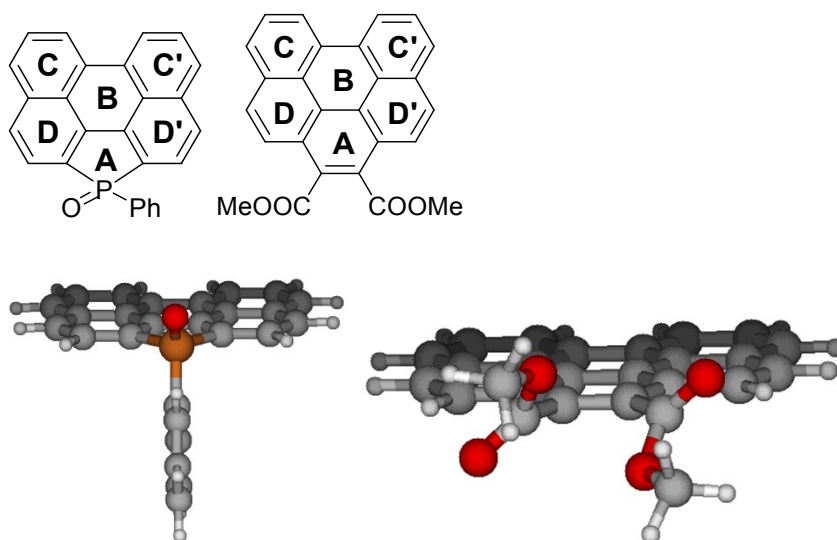

|           | <b>1</b> |         |         | <b>2</b> |         |         |
|-----------|----------|---------|---------|----------|---------|---------|
|           | NICS(-1) | NICS(0) | NICS(1) | NICS(-1) | NICS(0) | NICS(1) |
| <b>A</b>  | 3.9      | 7.4     | 3.7     | -11.9    | -11.1   | -11.9   |
| <b>B</b>  | 3.1      | 8.4     | 3.1     | -2.0     | 2.5     | -2.0    |
| <b>C</b>  | -7.5     | -4.8    | -7.6    | -11.6    | -9.4    | -11.6   |
| <b>C'</b> | -7.6     | -4.6    | -7.6    | -11.6    | -9.4    | -11.6   |
| <b>D</b>  | -7.8     | -5.4    | -7.8    | -7.0     | -3.9    | -7.0    |
| <b>D'</b> | -7.9     | -5.3    | -7.7    | -7.0     | -4.0    | -7.0    |

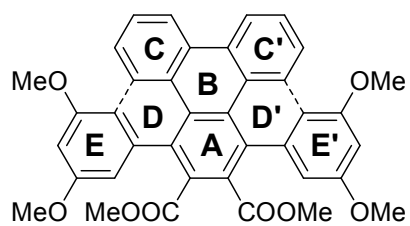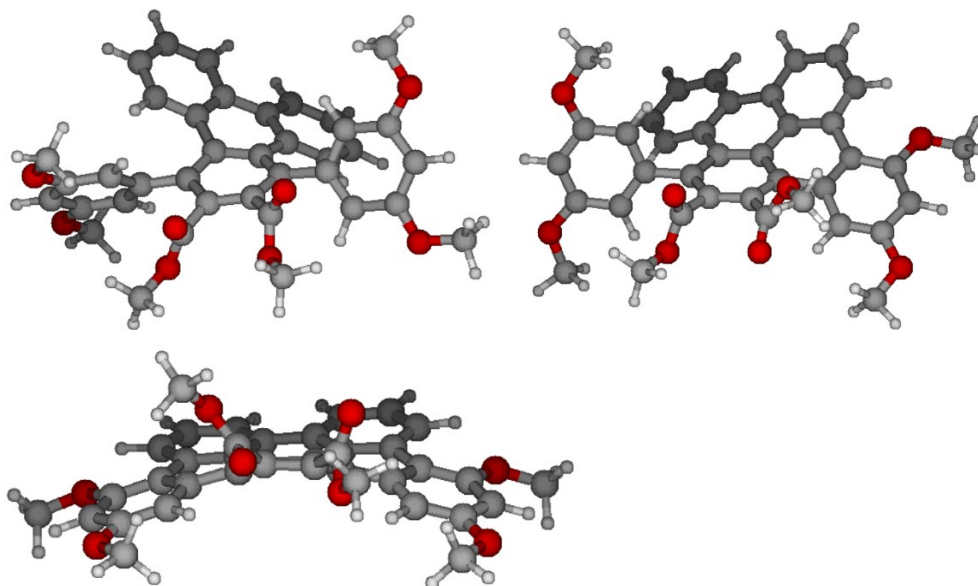

|           | 6        |         |         | 7        |         |         | 8        |         |         |
|-----------|----------|---------|---------|----------|---------|---------|----------|---------|---------|
|           | NICS(-1) | NICS(0) | NICS(1) | NICS(-1) | NICS(0) | NICS(1) | NICS(-1) | NICS(0) | NICS(1) |
| <b>A</b>  | -8.9     | -7.9    | -9.1    | -9.0     | -9.6    | -11.1   | -9.9     | -10.0   | -12.2   |
| <b>B</b>  | -4.1     | -0.6    | -4.0    | -3.9     | -0.2    | -4.0    | -2.6     | 0.8     | -3.6    |
| <b>C</b>  | -10.4    | -7.7    | -9.0    | -10.4    | -7.4    | -8.8    | -10.3    | -8.4    | -10.8   |
| <b>C'</b> | -9.0     | -7.7    | -10.3   | -9.8     | -8.4    | -10.9   | -10.1    | -8.4    | -11.0   |
| <b>D</b>  | -        | -       | -       | -        | -       | -       | -4.7     | -0.6    | -3.3    |
| <b>D'</b> | -        | -       | -       | -4.5     | -0.4    | -3.9    | -4.6     | -0.7    | -3.7    |
| <b>E</b>  | -9.2     | -9.2    | -8.5    | -8.9     | -9.4    | -8.7    | -9.7     | -9.3    | -8.3    |
| <b>E'</b> | -8.9     | -9.2    | -8.6    | -10.1    | -9.4    | -8.4    | -9.8     | -9.2    | -8.4    |

**Table S18.** NICS indices for calculated planar geometries of **6planar**, **7planar** and **8planar** at the B3LYP/6-311+G\*//B3LYP/6-31+G\* level. The NICS(-1) and NICS(1) values correspond to the direction depicted on stick representation, the NICS(1) value is calculated above the PAH.

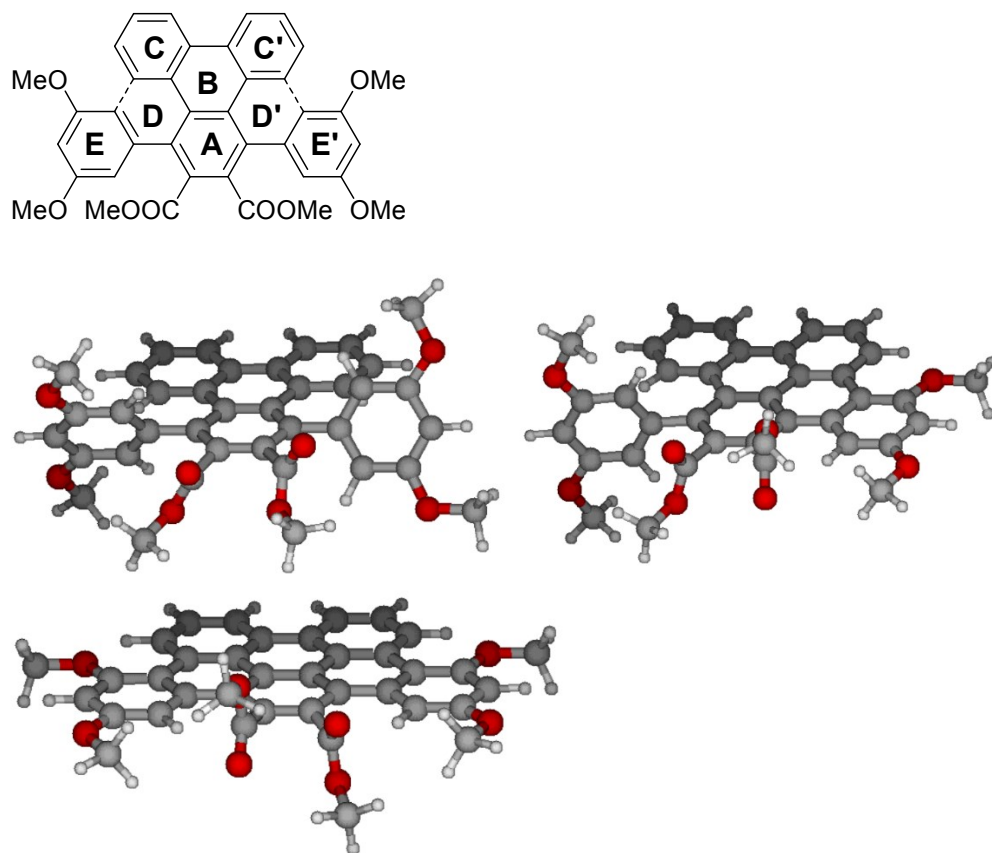

|           | <b>6planar</b> |         |         | <b>7planar</b> |         |         | <b>8planar</b> |         |         |
|-----------|----------------|---------|---------|----------------|---------|---------|----------------|---------|---------|
|           | NICS(-1)       | NICS(0) | NICS(1) | NICS(-1)       | NICS(0) | NICS(1) | NICS(-1)       | NICS(0) | NICS(1) |
| <b>A</b>  | -9.1           | -8.8    | -9.0    | -10.5          | -10.3   | -10.7   | -11.3          | -10.8   | -11.3   |
| <b>B</b>  | -4.4           | -1.3    | -4.4    | -4.0           | -0.6    | -4.0    | -3.2           | 0.6     | -3.2    |
| <b>C</b>  | -10.0          | -7.9    | -10.1   | -9.6           | -7.5    | -9.7    | -11.1          | -9.1    | -11.1   |
| <b>C'</b> | -10.1          | -8.0    | -10.1   | -11.1          | -9.1    | -11.1   | -11.1          | -9.1    | -11.1   |
| <b>D</b>  | -              | -       | -       | -              | -       | -       | -3.8           | -0.7    | -3.7    |
| <b>D'</b> | -              | -       | -       | -4.0           | -1.1    | -4.0    | -3.7           | -0.7    | -3.8    |
| <b>E</b>  | -9.0           | -9.1    | -8.2    | -8.8           | -9.1    | -8.3    | -9.1           | -9.3    | -9.1    |
| <b>E'</b> | -9.1           | -9.1    | -8.2    | -9.3           | -9.5    | -9.2    | -9.1           | -9.3    | -9.1    |

**Total energies, number of imaginary frequencies (NImag) and Cartesian coordinates at the B3LYP/6-31+G\* level**

**1**

E(hartree)= -1416.488603

NImag= 0

|   |           |           |           |
|---|-----------|-----------|-----------|
| C | 0.057290  | 0.006945  | -0.061505 |
| C | -0.029067 | -0.064050 | 1.381683  |
| C | 1.136638  | -0.076459 | 2.172406  |
| C | 2.429462  | -0.012148 | 1.552147  |
| C | 2.518292  | 0.060882  | 0.067601  |
| C | 1.308832  | 0.065097  | -0.705341 |
| C | 0.969364  | -0.159093 | 3.588786  |
| C | -0.354395 | -0.227187 | 4.119645  |
| C | -1.476484 | -0.211162 | 3.303946  |
| C | -1.310735 | -0.124805 | 1.906022  |
| C | 3.534038  | -0.028449 | 2.396572  |
| C | 3.384601  | -0.106874 | 3.801168  |
| C | 2.138905  | -0.172162 | 4.394803  |
| C | 1.311720  | 0.122353  | -2.132805 |
| C | 2.568895  | 0.181331  | -2.791359 |
| C | 3.734724  | 0.180974  | -2.050234 |
| C | 3.715551  | 0.120790  | -0.636947 |
| C | -1.152526 | 0.005269  | -0.737995 |
| C | -1.150299 | 0.056998  | -2.147408 |
| C | 0.060931  | 0.114244  | -2.821463 |
| P | -2.513913 | -0.089072 | 0.505838  |

|   |           |           |           |
|---|-----------|-----------|-----------|
| O | -3.504823 | -1.214977 | 0.391137  |
| C | -3.335224 | 1.547542  | 0.537233  |
| C | -4.733963 | 1.570216  | 0.454767  |
| C | -5.416286 | 2.790725  | 0.474006  |
| C | -4.705672 | 3.989069  | 0.575387  |
| C | -3.308464 | 3.969529  | 0.657912  |
| C | -2.624435 | 2.753505  | 0.638993  |
| H | -5.273030 | 0.630116  | 0.376330  |
| H | -6.501408 | 2.802911  | 0.409767  |
| H | -5.236670 | 4.937614  | 0.590296  |
| H | -2.753420 | 4.900862  | 0.736868  |
| H | -1.538826 | 2.746158  | 0.703498  |
| H | -2.468998 | -0.270834 | 3.742587  |
| H | -0.474979 | -0.297670 | 5.198225  |
| H | 2.045123  | -0.234886 | 5.476283  |
| H | 4.277400  | -0.117862 | 4.421167  |
| H | 4.539972  | 0.016119  | 1.990705  |
| H | -2.083221 | 0.046316  | -2.704715 |
| H | 0.069926  | 0.150279  | -3.908415 |
| H | 2.604798  | 0.225216  | -3.877229 |
| H | 4.694985  | 0.225455  | -2.557708 |
| H | 4.665784  | 0.119585  | -0.111900 |

2

E(hartree)= -1301.432315

NImag= 0

|   |           |           |           |
|---|-----------|-----------|-----------|
| C | -0.028266 | -0.106413 | -0.002030 |
| C | -0.030060 | -0.041459 | 1.433438  |
| C | 1.215392  | -0.022503 | 2.122552  |
| C | 2.447340  | -0.085105 | 1.384982  |
| C | 2.409404  | -0.149596 | -0.042438 |
| C | 1.138950  | -0.156437 | -0.702078 |
| C | 1.244015  | 0.056242  | 3.549570  |
| C | 0.027696  | 0.138111  | 4.284589  |
| C | -1.211333 | 0.125054  | 3.575652  |
| C | -1.239531 | 0.034171  | 2.188033  |
| C | 2.504175  | 0.055156  | 4.240667  |
| C | 2.522791  | 0.120141  | 5.668448  |
| C | 1.279804  | 0.191215  | 6.374957  |
| C | 0.086286  | 0.201521  | 5.718931  |
| C | 3.707842  | -0.078302 | 2.056801  |
| C | 3.736779  | -0.015361 | 3.522359  |
| C | 3.752064  | 0.114319  | 6.353587  |
| C | 4.944192  | 0.044611  | 5.647747  |
| C | 4.934298  | -0.019115 | 4.251132  |
| C | 3.610989  | -0.205898 | -0.772907 |
| C | 4.830591  | -0.197824 | -0.112039 |
| C | 4.876005  | -0.135005 | 1.283913  |



|   |           |           |           |
|---|-----------|-----------|-----------|
| C | -2.493538 | 0.166785  | 4.358337  |
| O | -3.312359 | 0.851115  | 4.011427  |
| C | -4.581422 | -0.897761 | 4.690832  |
| C | -2.550464 | 0.058710  | 1.453703  |
| O | -3.302741 | 1.116770  | 1.829899  |
| C | -4.592189 | 1.228813  | 1.198188  |
| O | -2.766065 | 0.974983  | 5.223035  |
| O | -2.895921 | -0.733686 | 0.600517  |
| H | -4.430766 | -1.027230 | 5.765891  |
| H | -5.101453 | -1.757619 | 4.268015  |
| H | -5.141909 | 0.024334  | 4.514666  |
| H | 5.886388  | -0.073344 | 3.735470  |
| H | 5.893415  | 0.039103  | 6.177109  |
| H | 3.753739  | 0.164618  | 7.439793  |
| H | 1.304223  | 0.243273  | 7.460953  |
| H | -0.835230 | 0.280465  | 6.281345  |
| H | -4.475264 | 1.351439  | 0.118140  |
| H | -5.051518 | 2.113705  | 1.639259  |
| H | -5.192086 | 0.336379  | 1.395988  |
| H | 5.848172  | -0.129952 | 1.763692  |
| H | 5.758474  | -0.240287 | -0.676405 |
| H | 3.569623  | -0.255182 | -1.858372 |
| H | 1.120201  | -0.208641 | -1.788179 |
| H | -0.972924 | -0.137665 | -0.529644 |

6

E(hartree)= -2069.1643725

NImag= 0

|   |           |           |           |
|---|-----------|-----------|-----------|
| C | -0.733298 | -1.424990 | 0.016127  |
| C | -1.453600 | -2.743843 | -0.087131 |
| O | -1.472842 | -3.590079 | 0.786299  |
| O | -2.052427 | -2.883276 | -1.282040 |
| C | -2.818040 | -4.088204 | -1.469668 |
| C | -1.444530 | -0.220027 | 0.063658  |
| C | -0.717526 | 1.006801  | 0.124376  |
| C | -1.318872 | 2.292662  | 0.533539  |
| C | -2.502229 | 2.350939  | 1.307372  |
| C | -3.007626 | 3.551326  | 1.783505  |
| C | -2.334718 | 4.750453  | 1.513540  |
| C | -1.156060 | 4.718386  | 0.785139  |
| C | -0.625827 | 3.508072  | 0.287391  |
| C | -2.939307 | -0.278479 | -0.010782 |
| C | -3.598708 | 0.355868  | -1.071525 |
| C | -4.994886 | 0.270528  | -1.161850 |
| C | -5.727667 | -0.439486 | -0.206038 |
| C | -5.062060 | -1.073474 | 0.845443  |
| C | -3.664357 | -0.997179 | 0.951619  |
| O | -5.733499 | 0.847878  | -2.156091 |
| C | -5.061680 | 1.615143  | -3.148205 |
| O | -5.858182 | -1.746184 | 1.728880  |

|   |           |           |           |
|---|-----------|-----------|-----------|
| C | -5.247140 | -2.417103 | 2.826986  |
| C | 0.671771  | -1.430891 | 0.116527  |
| C | 1.380972  | -2.725565 | 0.419660  |
| O | 1.963284  | -2.953996 | 1.456844  |
| O | 1.263332  | -3.610571 | -0.593302 |
| C | 1.810706  | -4.920416 | -0.341605 |
| C | 1.395047  | -0.240379 | -0.012055 |
| C | 0.682857  | 0.988336  | -0.153568 |
| C | 1.302241  | 2.237938  | -0.639508 |
| C | 2.483425  | 2.230714  | -1.418135 |
| C | 3.007138  | 3.393120  | -1.963895 |
| C | 2.355687  | 4.617110  | -1.761373 |
| C | 1.178955  | 4.647295  | -1.029636 |
| C | 0.629588  | 3.476635  | -0.462806 |
| C | 2.888326  | -0.309194 | 0.080584  |
| C | 3.622149  | -1.079356 | -0.820025 |
| C | 5.019840  | -1.160756 | -0.692641 |
| C | 5.678134  | -0.478482 | 0.328103  |
| C | 4.926357  | 0.288998  | 1.235560  |
| C | 3.539799  | 0.382504  | 1.118655  |
| O | 5.650164  | -1.936703 | -1.625677 |
| C | 7.064436  | -2.066755 | -1.557643 |
| O | 5.660634  | 0.908056  | 2.207442  |
| C | 4.978433  | 1.692915  | 3.178969  |
| H | -2.182012 | -4.967816 | -1.341581 |

|             |           |           |
|-------------|-----------|-----------|
| H -3.199504 | -4.029912 | -2.489208 |
| H -3.642491 | -4.123590 | -0.752287 |
| H -3.020244 | 1.439063  | 1.567235  |
| H -3.914152 | 3.551242  | 2.383088  |
| H -2.715110 | 5.695377  | 1.892958  |
| H -0.616050 | 5.645471  | 0.626390  |
| H -3.017033 | 0.895009  | -1.808932 |
| H -6.808103 | -0.499418 | -0.282738 |
| H -3.138001 | -1.470159 | 1.771474  |
| H -4.528545 | 2.464364  | -2.702143 |
| H -5.843981 | 1.984780  | -3.813459 |
| H -4.357067 | 0.998378  | -3.720969 |
| H -4.540427 | -3.183674 | 2.486195  |
| H -6.065316 | -2.890393 | 3.372544  |
| H -4.729700 | -1.709706 | 3.487853  |
| H 2.880453  | -4.848965 | -0.129370 |
| H 1.635352  | -5.486450 | -1.256971 |
| H 1.296868  | -5.380901 | 0.506303  |
| H 2.984013  | 1.296113  | -1.626624 |
| H 3.911114  | 3.343058  | -2.565254 |
| H 2.750839  | 5.532190  | -2.195037 |
| H 0.655370  | 5.591157  | -0.923333 |
| H 3.139442  | -1.610776 | -1.634035 |
| H 6.752161  | -0.519473 | 0.462058  |
| H 2.950824  | 0.962580  | 1.817976  |

|   |          |           |           |
|---|----------|-----------|-----------|
| H | 7.560304 | -1.094184 | -1.674479 |
| H | 7.341887 | -2.718554 | -2.387960 |
| H | 7.377289 | -2.526139 | -0.610941 |
| H | 4.447394 | 2.531857  | 2.711362  |
| H | 5.753850 | 2.077592  | 3.843755  |
| H | 4.270480 | 1.083894  | 3.755306  |

7

E(hartree)= -2067.982675

NImag= 0

|   |           |           |           |
|---|-----------|-----------|-----------|
| C | 3.413901  | -1.573591 | -0.648362 |
| C | 2.824052  | -0.374725 | -0.188559 |
| C | 3.597915  | 0.790510  | 0.032781  |
| C | 5.014752  | 0.663432  | -0.145017 |
| C | 5.591049  | -0.533678 | -0.547036 |
| C | 4.786510  | -1.650668 | -0.820519 |
| C | 2.904998  | 2.052977  | 0.315178  |
| C | 1.504388  | 2.140204  | 0.025258  |
| C | 0.716372  | 0.937561  | -0.162558 |
| C | 1.368072  | -0.315310 | -0.021806 |
| C | 0.842606  | 3.397010  | 0.083575  |
| C | 1.529986  | 4.510603  | 0.589895  |
| C | 2.855125  | 4.395776  | 0.990542  |
| C | 3.543788  | 3.195424  | 0.830525  |
| C | -0.703643 | 1.006590  | -0.320081 |
| C | -1.281341 | 2.317505  | -0.672225 |

|   |           |           |           |
|---|-----------|-----------|-----------|
| C | -0.526230 | 3.495864  | -0.425623 |
| C | -2.535071 | 2.455504  | -1.312200 |
| C | -3.057358 | 3.697609  | -1.639879 |
| C | -2.334178 | 4.860353  | -1.342459 |
| C | -1.082980 | 4.751234  | -0.756983 |
| C | 0.586014  | -1.458339 | 0.236254  |
| C | -0.811471 | -1.380189 | 0.171340  |
| C | -1.470764 | -0.174326 | -0.127437 |
| C | -2.970870 | -0.179402 | -0.039633 |
| C | -3.580657 | 0.413018  | 1.073257  |
| C | -4.978733 | 0.398327  | 1.181893  |
| C | -5.760374 | -0.197773 | 0.188828  |
| C | -5.142827 | -0.794093 | -0.912650 |
| C | -3.744997 | -0.794312 | -1.033529 |
| C | -1.604579 | -2.600321 | 0.578756  |
| O | -2.021107 | -3.315341 | -0.478967 |
| C | -2.713729 | -4.540731 | -0.168955 |
| O | -5.670477 | 0.945340  | 2.225202  |
| C | -4.940477 | 1.573180  | 3.273229  |
| O | -5.989900 | -1.356076 | -1.829091 |
| C | -5.437587 | -1.945843 | -2.999037 |
| C | 1.173003  | -2.738967 | 0.765588  |
| O | 1.855560  | -2.521631 | 1.903604  |
| C | 2.420432  | -3.683966 | 2.537036  |
| O | 5.778034  | 1.776833  | 0.062058  |

|   |           |           |           |
|---|-----------|-----------|-----------|
| C | 7.173928  | 1.730602  | -0.208257 |
| O | 5.455745  | -2.751969 | -1.269897 |
| C | 4.701155  | -3.906780 | -1.627556 |
| O | -1.810098 | -2.911144 | 1.734598  |
| O | 1.004943  | -3.843325 | 0.280321  |
| H | -0.503604 | 5.653373  | -0.594395 |
| H | -2.731619 | 5.839176  | -1.598572 |
| H | -4.020916 | 3.760307  | -2.138799 |
| H | -3.101439 | 1.575391  | -1.578568 |
| H | -2.950808 | -4.988829 | -1.134408 |
| H | -2.062455 | -5.198944 | 0.411453  |
| H | -3.625032 | -4.330164 | 0.396948  |
| H | -2.960627 | 0.872494  | 1.833214  |
| H | -6.841593 | -0.203310 | 0.276724  |
| H | -3.252260 | -1.253885 | -1.880654 |
| H | -5.690947 | 1.928875  | 3.981388  |
| H | -4.272123 | 0.862010  | 3.774998  |
| H | -4.358401 | 2.424835  | 2.898359  |
| H | -6.289707 | -2.314680 | -3.572922 |
| H | -4.886654 | -1.208241 | -3.597332 |
| H | -4.773608 | -2.784051 | -2.752137 |
| H | 1.022333  | 5.462170  | 0.703400  |
| H | 3.367820  | 5.253667  | 1.418411  |
| H | 4.581779  | 3.142260  | 1.118920  |
| H | 2.892328  | -3.312620 | 3.446888  |

|   |          |           |           |
|---|----------|-----------|-----------|
| H | 1.634545 | -4.405745 | 2.773194  |
| H | 3.162449 | -4.150387 | 1.882533  |
| H | 6.658008 | -0.630773 | -0.700143 |
| H | 2.785099 | -2.408494 | -0.922492 |
| H | 7.542709 | 2.738267  | -0.007965 |
| H | 7.685056 | 1.017105  | 0.450287  |
| H | 7.367131 | 1.470792  | -1.256479 |
| H | 5.434011 | -4.647429 | -1.951831 |
| H | 4.135883 | -4.297701 | -0.772828 |
| H | 4.009953 | -3.688572 | -2.451260 |

8

E(hartree)= -2066.7997436

NImag= 0

|   |           |           |           |
|---|-----------|-----------|-----------|
| C | 0.751573  | 0.981999  | 0.137553  |
| C | -0.677139 | 1.003319  | 0.105127  |
| C | -1.402523 | 2.249637  | 0.104088  |
| C | -0.681647 | 3.461771  | 0.301289  |
| C | -1.400172 | 4.662461  | 0.414399  |
| C | -2.787168 | 4.664905  | 0.366069  |
| C | -3.497246 | 3.485258  | 0.164694  |
| C | -2.833863 | 2.255332  | -0.003803 |
| C | -3.529320 | 0.996653  | -0.302885 |
| C | -4.894070 | 0.898989  | -0.740746 |
| C | -5.464698 | -0.318114 | -1.084517 |
| C | -4.702816 | -1.496226 | -1.047453 |



|   |           |           |           |
|---|-----------|-----------|-----------|
| C | -3.382688 | -1.449365 | -0.637212 |
| C | -2.804422 | -0.222295 | -0.232876 |
| C | -1.396007 | -0.206820 | 0.151905  |
| C | -0.692420 | -1.380625 | 0.540466  |
| C | 0.702115  | -1.423525 | 0.469559  |
| C | 1.441671  | -0.255323 | 0.127952  |
| C | 2.871890  | -0.258887 | -0.192962 |
| C | 3.462307  | -1.439674 | -0.701471 |
| C | 4.803335  | -1.455840 | -1.046548 |
| C | 5.583718  | -0.301992 | -0.891804 |
| C | 5.008603  | 0.873664  | -0.434521 |
| C | 3.618900  | 0.946040  | -0.081088 |
| C | 2.926679  | 2.187792  | 0.281846  |
| C | 3.592465  | 3.374169  | 0.641890  |
| C | 2.888085  | 4.552107  | 0.870478  |
| C | 1.507647  | 4.595439  | 0.731697  |
| C | 0.782119  | 3.435700  | 0.416997  |
| C | 1.493550  | 2.213403  | 0.236773  |
| C | -6.937771 | 2.019047  | -1.359961 |
| C | -4.632688 | -3.851123 | -1.487951 |
| C | 4.741083  | -3.733379 | -1.791252 |
| C | 7.104212  | 2.016695  | -0.773926 |
| C | -1.414971 | -2.501851 | 1.238128  |
| C | -2.929451 | -2.983318 | 2.990722  |
| C | 1.371481  | -2.665820 | 1.019006  |

|   |           |           |           |
|---|-----------|-----------|-----------|
| C | 1.842699  | -4.949036 | 0.653876  |
| O | -5.615687 | 2.055113  | -0.836504 |
| O | -5.354105 | -2.622599 | -1.460133 |
| O | 5.464779  | -2.528618 | -1.573083 |
| O | 5.749587  | 2.017520  | -0.340940 |
| O | -1.293954 | -3.693536 | 1.016511  |
| O | -2.192150 | -2.013951 | 2.225474  |
| O | 1.751080  | -2.757746 | 2.167503  |
| O | 1.437472  | -3.671820 | 0.125303  |
| H | -0.884321 | 5.604615  | 0.554003  |
| H | -3.329035 | 5.600193  | 0.483366  |
| H | -4.573530 | 3.522592  | 0.135486  |
| H | -6.489595 | -0.391927 | -1.423838 |
| H | -2.770408 | -2.338208 | -0.684955 |
| H | 2.846834  | -2.306457 | -0.883034 |
| H | 6.626400  | -0.356026 | -1.175865 |
| H | 4.664703  | 3.378200  | 0.746489  |
| H | 3.429544  | 5.451174  | 1.154443  |
| H | 0.999031  | 5.535985  | 0.904428  |
| H | -6.950078 | 1.618692  | -2.381254 |
| H | -7.274276 | 3.057455  | -1.370986 |
| H | -7.604704 | 1.426060  | -0.721593 |
| H | -3.791002 | -3.801074 | -2.190157 |
| H | -5.346748 | -4.603474 | -1.827035 |
| H | -4.259449 | -4.118992 | -0.491942 |

|   |           |           |           |
|---|-----------|-----------|-----------|
| H | 4.351775  | -4.137055 | -0.849014 |
| H | 5.458281  | -4.434684 | -2.221451 |
| H | 3.911888  | -3.578457 | -2.493206 |
| H | 7.716358  | 1.334109  | -0.171249 |
| H | 7.455119  | 3.040584  | -0.631753 |
| H | 7.182760  | 1.746275  | -1.834322 |
| H | -3.629615 | -3.522678 | 2.346136  |
| H | -3.467879 | -2.404696 | 3.741594  |
| H | -2.247197 | -3.694124 | 3.464031  |
| H | 2.833477  | -4.881799 | 1.111571  |
| H | 1.851890  | -5.624927 | -0.201865 |
| H | 1.115293  | -5.283246 | 1.397692  |

### 6planar

E(hartree)= -2069.149109

NImag= 3

|   |           |           |           |
|---|-----------|-----------|-----------|
| C | -1.492350 | 2.524406  | -0.034419 |
| C | -0.779941 | 3.755512  | -0.094078 |
| C | 0.680223  | 3.764864  | -0.100876 |
| C | 1.408240  | 2.542888  | -0.047919 |
| C | 0.690669  | 1.239378  | 0.015089  |
| C | -0.757352 | 1.230053  | 0.021833  |
| C | -1.441293 | -0.032872 | 0.082829  |
| C | -0.715649 | -1.224271 | 0.134392  |
| C | 0.683933  | -1.215254 | 0.127874  |
| C | 1.392070  | -0.013649 | 0.069589  |

|   |           |           |           |
|---|-----------|-----------|-----------|
| C | 1.383602  | 4.992784  | -0.160350 |
| C | 2.763383  | 5.059661  | -0.169440 |
| C | 3.490068  | 3.867472  | -0.117845 |
| C | 2.823343  | 2.655258  | -0.059253 |
| C | -2.909052 | 2.620126  | -0.032637 |
| C | -3.591386 | 3.823994  | -0.084962 |
| C | -2.879656 | 5.024918  | -0.143232 |
| C | -1.499176 | 4.974608  | -0.146942 |
| C | 2.883906  | -0.223419 | 0.017261  |
| C | 3.632569  | -0.264786 | 1.207898  |
| C | 4.995784  | -0.547850 | 1.143177  |
| C | 5.627744  | -0.784516 | -0.092222 |
| C | 4.869012  | -0.758191 | -1.260066 |
| C | 3.488952  | -0.486936 | -1.208169 |
| O | 5.374832  | -0.989067 | -2.508835 |
| C | 6.761264  | -1.275684 | -2.638077 |
| O | 5.818030  | -0.627537 | 2.231152  |
| C | 5.246986  | -0.467682 | 3.526023  |
| C | 1.409230  | -2.532495 | 0.273207  |
| O | 2.062823  | -2.866888 | 1.236563  |
| C | -1.406188 | -2.562737 | 0.255917  |
| O | -1.389883 | -3.232256 | 1.270395  |
| C | -2.931412 | -0.259195 | 0.072341  |
| C | -3.616372 | -0.340543 | -1.147991 |
| C | 4.987690  | -0.624392 | -1.145118 |

|   |           |           |           |
|---|-----------|-----------|-----------|
| C | -5.667505 | -0.837675 | 0.058945  |
| C | -4.970763 | -0.780053 | 1.267562  |
| C | -3.595014 | -0.493867 | 1.281919  |
| O | -5.752148 | -0.723292 | -2.274797 |
| C | -5.138945 | -0.485183 | -3.536414 |
| O | -5.712524 | -1.018376 | 2.389061  |
| C | -5.062263 | -0.998756 | 3.656018  |
| O | -1.993560 | -2.951907 | -0.887369 |
| C | -2.682010 | -4.216351 | -0.840857 |
| O | 1.200068  | -3.324838 | -0.801186 |
| C | 1.801162  | -4.633028 | -0.735153 |
| H | -1.986655 | -5.018000 | -0.578243 |
| H | -3.080468 | -4.363634 | -1.844919 |
| H | -3.490514 | -4.179612 | -0.106244 |
| H | -3.514627 | 1.737665  | 0.010541  |
| H | -4.678256 | 3.818688  | -0.079978 |
| H | -3.393144 | 5.982028  | -0.184958 |
| H | -0.966370 | 5.914489  | -0.192440 |
| H | -3.072925 | -0.180808 | -2.070977 |
| H | -6.729669 | -1.058334 | 0.052396  |
| H | -3.038191 | -0.445454 | 2.209729  |
| H | -4.731726 | 0.532323  | -3.596804 |
| H | -5.932760 | -0.603782 | -4.276067 |
| H | -4.340850 | -1.211416 | -3.737484 |
| H | -4.271788 | -1.757514 | 3.710299  |

|   |           |           |           |
|---|-----------|-----------|-----------|
| H | -5.839195 | -1.228005 | 4.387361  |
| H | -4.639472 | -0.008961 | 3.871146  |
| H | 2.886670  | -4.544633 | -0.641712 |
| H | 1.532907  | -5.120141 | -1.673151 |
| H | 1.405944  | -5.186911 | 0.120708  |
| H | 3.439227  | 1.779674  | -0.021718 |
| H | 4.576900  | 3.875655  | -0.122961 |
| H | 3.264803  | 6.022945  | -0.215876 |
| H | 0.839095  | 5.926191  | -0.200852 |
| H | 2.920485  | -0.469961 | -2.132513 |
| H | 6.689495  | -0.999195 | -0.088869 |
| H | 3.132416  | -0.097336 | 2.153063  |
| H | 7.376283  | -0.441569 | -2.275750 |
| H | 6.935499  | -1.418934 | -3.705941 |
| H | 7.031159  | -2.191897 | -2.096631 |
| H | 4.818697  | 0.535308  | 3.650716  |
| H | 6.071417  | -0.600276 | 4.228846  |
| H | 4.475765  | -1.224509 | 3.714293  |

### 7planar

E(hartree)= -2067.966022

NImag= 4

|   |           |           |           |
|---|-----------|-----------|-----------|
| C | -1.446918 | 0.033458  | -0.019135 |
| C | -0.634256 | 1.200235  | 0.020254  |
| C | 0.805735  | 1.036366  | -0.013009 |
| C | 1.410077  | -0.267576 | -0.084017 |

|   |           |           |           |
|---|-----------|-----------|-----------|
| C | 0.547895  | -1.389478 | -0.120450 |
| C | -0.838974 | -1.223985 | -0.088060 |
| C | -1.706203 | -2.467529 | -0.110406 |
| O | -1.936506 | -3.160842 | 0.861576  |
| C | 1.675319  | 2.203498  | 0.025380  |
| C | 3.108426  | 2.067893  | -0.006454 |
| C | 3.722848  | 0.738461  | -0.078819 |
| C | 2.885589  | -0.412304 | -0.117030 |
| C | 1.107032  | 3.512758  | 0.095991  |
| C | -0.342475 | 3.691753  | 0.130122  |
| C | -1.206920 | 2.566259  | 0.093564  |
| C | 3.888734  | 3.240918  | 0.033801  |
| C | 3.318272  | 4.502205  | 0.102234  |
| C | 1.944457  | 4.638829  | 0.133058  |
| C | -2.601166 | 2.833244  | 0.130773  |
| C | -3.124242 | 4.112961  | 0.199212  |
| C | -2.263587 | 5.214130  | 0.234714  |
| C | -0.900661 | 4.992343  | 0.200152  |
| C | 3.471381  | -1.700304 | -0.186970 |
| C | 4.840001  | -1.879006 | -0.219645 |
| C | 5.685406  | -0.768260 | -0.183428 |
| C | 5.149356  | 0.504545  | -0.115077 |
| C | -2.951647 | -0.031990 | 0.004691  |
| C | -3.671058 | 0.023739  | -1.197277 |
| C | -5.067109 | -0.094336 | -1.165596 |

|   |           |           |           |
|---|-----------|-----------|-----------|
| C | -5.736432 | -0.280668 | 0.047905  |
| C | -5.007634 | -0.362857 | 1.236538  |
| C | -3.608873 | -0.240269 | 1.222895  |
| C | 0.911701  | -2.842708 | 0.086645  |
| O | 0.875120  | -3.709420 | -0.766127 |
| O | -5.865575 | -0.046305 | -2.274803 |
| C | -5.259569 | 0.174146  | -3.543061 |
| O | -5.745303 | -0.566481 | 2.367732  |
| C | -5.065301 | -0.693889 | 3.612262  |
| O | 5.996693  | 1.577722  | -0.082855 |
| C | 7.404276  | 1.378602  | -0.118306 |
| O | 5.474107  | -3.084566 | -0.305965 |
| C | 4.690499  | -4.267955 | -0.414816 |
| O | 1.137343  | -3.085008 | 1.391983  |
| C | 1.203119  | -4.468939 | 1.786232  |
| O | -2.156780 | -2.733991 | -1.344918 |
| C | -2.967439 | -3.918364 | -1.479306 |
| H | -0.254472 | 5.858857  | 0.228643  |
| H | -2.651135 | 6.228266  | 0.288469  |
| H | -4.202594 | 4.246323  | 0.224613  |
| H | -3.310520 | 2.030164  | 0.106339  |
| H | -3.215522 | -3.976326 | -2.539284 |
| H | -2.400184 | -4.798708 | -1.167056 |
| H | -3.872627 | -3.826574 | -0.873433 |
| H | -3.027264 | -0.303603 | 2.134290  |



|   |           |           |           |
|---|-----------|-----------|-----------|
| H | -6.817210 | -0.373363 | 0.064471  |
| H | -3.135548 | 0.164626  | -2.127891 |
| H | -5.845094 | -0.868602 | 4.355593  |
| H | -4.371107 | -1.543331 | 3.601267  |
| H | -4.520296 | 0.224939  | 3.864514  |
| H | -6.079597 | 0.180457  | -4.263350 |
| H | -4.738233 | 1.139584  | -3.574189 |
| H | -4.556866 | -0.629806 | -3.796930 |
| H | 1.531494  | 5.636363  | 0.186499  |
| H | 3.957226  | 5.381315  | 0.131436  |
| H | 4.959045  | 3.170362  | 0.011444  |
| H | 1.455479  | -4.452048 | 2.846702  |
| H | 0.228448  | -4.937986 | 1.629018  |
| H | 1.966093  | -5.002522 | 1.214185  |
| H | 6.752430  | -0.941590 | -0.210473 |
| H | 2.868688  | -2.583977 | -0.217030 |
| H | 7.837801  | 2.379932  | -0.082172 |
| H | 7.748087  | 0.800333  | 0.748184  |
| H | 7.714122  | 0.879745  | -1.044839 |
| H | 5.405213  | -5.083009 | -0.541187 |
| H | 4.104315  | -4.436974 | 0.496678  |
| H | 4.019065  | -4.227280 | -1.280856 |

## 8planar

E(hartree)= -2066.781267

NImag= 5

|   |           |           |           |
|---|-----------|-----------|-----------|
| C | 0.724643  | 1.028148  | 0.011761  |
| C | 1.452024  | 2.282951  | 0.023377  |
| C | 0.730294  | 3.511905  | 0.011722  |
| C | -0.730026 | 3.511946  | -0.011730 |
| C | -1.451806 | 2.283027  | -0.023257 |
| C | -0.724501 | 1.028184  | -0.011511 |
| C | 1.460946  | -0.193925 | 0.023649  |
| C | 0.699541  | -1.391348 | 0.011484  |
| C | -0.699494 | -1.391304 | -0.010983 |
| C | -1.460852 | -0.193856 | -0.023273 |
| C | 2.943685  | -0.181039 | 0.047460  |
| C | 3.648048  | 1.058471  | 0.058707  |
| C | 2.890325  | 2.312265  | 0.046473  |
| C | 3.527047  | 3.569469  | 0.056633  |
| C | 2.808700  | 4.755091  | 0.045035  |
| C | 1.427934  | 4.730303  | 0.022862  |
| C | -2.890102 | 2.312388  | -0.046356 |
| C | -3.526774 | 3.569617  | -0.056646 |
| C | -2.808382 | 4.755213  | -0.045171 |
| C | -1.427616 | 4.730375  | -0.022996 |
| C | -3.647881 | 1.058624  | -0.058460 |
| C | -2.943581 | -0.180923 | -0.047085 |

|   |           |           |           |
|---|-----------|-----------|-----------|
| C | 5.091378  | 0.988796  | 0.081889  |
| C | 5.770799  | -0.215195 | 0.092863  |
| C | 5.056966  | -1.414818 | 0.081462  |
| C | 3.676306  | -1.394418 | 0.059289  |
| C | -5.091221 | 0.989025  | -0.081635 |
| C | -5.770717 | -0.214926 | -0.092485 |
| C | -5.056953 | -1.414586 | -0.080960 |
| C | -3.676293 | -1.394236 | -0.058788 |
| C | 1.254252  | -2.783354 | -0.223146 |
| O | 1.435497  | -2.986662 | -1.540054 |
| C | 1.694587  | -4.342358 | -1.953320 |
| C | -1.254390 | -2.783157 | 0.224106  |
| O | -1.435765 | -2.985892 | 1.541057  |
| C | -1.695841 | -4.341247 | 1.954798  |
| O | 5.826615  | -2.542178 | 0.114973  |
| C | 5.185797  | -3.811457 | 0.170846  |
| O | 5.808195  | 2.153343  | 0.095704  |
| C | 7.229295  | 2.118165  | 0.124471  |
| O | -5.807971 | 2.153597  | -0.096460 |
| C | -7.229069 | 2.118384  | -0.125142 |
| O | -5.826604 | -2.541924 | -0.114999 |
| C | -5.185890 | -3.811091 | -0.174868 |
| O | -1.414694 | -3.644327 | -0.621203 |
| O | 1.414220  | -3.644287 | 0.622459  |
| H | -0.901018 | 5.674211  | -0.014589 |

|   |           |           |           |
|---|-----------|-----------|-----------|
| H | -3.338022 | 5.704681  | -0.053727 |
| H | -4.597913 | 3.626838  | -0.073851 |
| H | -6.850639 | -0.266265 | -0.116195 |
| H | -3.183456 | -2.343173 | -0.050824 |
| H | 3.183398  | -2.343319 | 0.051423  |
| H | 6.850836  | -0.266610 | 0.110211  |
| H | 4.598190  | 3.626645  | 0.073831  |
| H | 3.338375  | 5.704540  | 0.053491  |
| H | 0.901372  | 5.674159  | 0.014356  |
| H | -7.598389 | 1.619259  | -1.029510 |
| H | -7.542909 | 3.164036  | -0.133267 |
| H | -7.635104 | 1.622295  | 0.765093  |
| H | -4.510289 | -3.880428 | -1.035770 |
| H | -5.989938 | -4.542084 | -0.276894 |
| H | -4.626701 | -4.012538 | 0.747055  |
| H | 4.510762  | -3.883671 | 1.031967  |
| H | 5.989834  | -4.542882 | 0.269799  |
| H | 4.625984  | -4.009639 | -0.751397 |
| H | 7.598504  | 1.618530  | 1.028599  |
| H | 7.543098  | 3.163824  | 0.133138  |
| H | 7.635485  | 1.622619  | -0.765997 |
| H | -2.580812 | -4.739355 | 1.452745  |
| H | -1.855231 | -4.284849 | 3.031741  |
| H | -0.827734 | -4.963506 | 1.723389  |
| H | 1.854647  | -4.286389 | -3.030190 |

H 0.825760 -4.963722 -1.722235  
H 2.578892 -4.741194 -1.450670

### 8twisted

E(hartree)= -2066.800582

NImag= 0

C -3.397601 3.410225 0.991014  
C -2.827619 2.204680 0.535131  
C -1.426546 2.211487 0.229951  
C -0.698241 3.431697 0.218722  
C -1.326385 4.611325 0.643338  
C -2.651930 4.584762 1.056932  
C 0.698213 3.431713 -0.218623  
C 1.426520 2.211504 -0.229917  
C 0.714636 0.971781 -0.029634  
C -0.714657 0.971767 0.029653  
C -3.593100 0.979130 0.271728  
C -2.896893 -0.193285 -0.132820  
C -1.434153 -0.244972 -0.006024  
C -0.699295 -1.457198 0.019392  
C 0.699322 -1.457181 -0.019317  
C 1.434148 -0.244941 0.006069  
C 2.896878 -0.193244 0.132869  
C 3.593074 0.979149 -0.271745  
C 2.827593 2.204708 -0.535098  
C 3.397595 3.410295 -0.990852

|   |           |           |           |
|---|-----------|-----------|-----------|
| C | 2.651928  | 4.584837  | -1.056691 |
| C | 1.326367  | 4.611369  | -0.643142 |
| C | -3.586154 | -1.282783 | -0.712919 |
| C | -4.968703 | -1.279603 | -0.786086 |
| C | -5.693563 | -0.200139 | -0.261715 |
| C | -5.027772 | 0.905810  | 0.246340  |
| C | 5.027748  | 0.905790  | -0.246468 |
| C | 5.693539  | -0.200128 | 0.261648  |
| C | 4.968681  | -1.279537 | 0.786151  |
| C | 3.586134  | -1.282721 | 0.713025  |
| O | 5.722240  | -2.268200 | 1.349701  |
| C | 5.052603  | -3.355729 | 1.982935  |
| O | 5.727558  | 1.978697  | -0.721140 |
| C | 7.148454  | 1.978420  | -0.655108 |
| O | -5.727598 | 1.978798  | 0.720810  |
| C | -7.148480 | 1.978600  | 0.654552  |
| O | -5.722245 | -2.268323 | -1.349559 |
| C | -5.052609 | -3.355847 | -1.982813 |
| C | 1.355538  | -2.806028 | -0.184979 |
| C | -1.355455 | -2.806091 | 0.185011  |
| H | 0.767168  | 5.539265  | -0.696852 |
| H | 3.121438  | 5.492534  | -1.428011 |
| H | 4.431044  | 3.433089  | -1.292597 |
| H | 6.773602  | -0.244942 | 0.309361  |
| H | 3.030681  | -2.092049 | 1.159677  |

|   |           |           |           |
|---|-----------|-----------|-----------|
| H | -3.030710 | -2.092132 | -1.159529 |
| H | -6.773624 | -0.244928 | -0.309485 |
| H | -4.431035 | 3.432994  | 1.292812  |
| H | -3.121422 | 5.492425  | 1.428355  |
| H | -0.767180 | 5.539214  | 0.697107  |
| H | 7.499133  | 1.897519  | 0.381229  |
| H | 7.459118  | 2.938483  | -1.071576 |
| H | 7.575091  | 1.165134  | -1.255346 |
| H | 4.424689  | -3.004435 | 2.811172  |
| H | 5.842799  | -4.001203 | 2.370047  |
| H | 4.433344  | -3.916360 | 1.272675  |
| H | -4.424701 | -3.004541 | -2.811048 |
| H | -5.842807 | -4.001317 | -2.369926 |
| H | -4.433344 | -3.916489 | -1.272567 |
| H | -7.498999 | 1.897565  | -0.381829 |
| H | -7.459153 | 2.938745  | 1.070826  |
| H | -7.575270 | 1.165432  | 1.254843  |
| O | 1.363030  | -3.692708 | 0.649264  |
| O | 1.888404  | -2.926924 | -1.411293 |
| C | 2.472844  | -4.204720 | -1.726050 |
| H | 2.808513  | -4.118579 | -2.759648 |
| H | 3.318794  | -4.410217 | -1.064054 |
| H | 1.724442  | -4.994255 | -1.622929 |
| O | -1.363014 | -3.692672 | -0.649332 |
| O | -1.888297 | -2.927100 | 1.411313  |

|   |           |           |          |
|---|-----------|-----------|----------|
| C | -2.472772 | -4.204890 | 1.726001 |
| H | -2.808931 | -4.118619 | 2.759429 |
| H | -3.318384 | -4.410594 | 1.063637 |
| H | -1.724237 | -4.994365 | 1.623367 |

**Total energies, number of imaginary frequencies (NImag) and Cartesian coordinates at the B3LYPD3/6-31+G\* level**

**6**

E(hartree)= -2069.261631

NImag= 0

|   |           |           |           |
|---|-----------|-----------|-----------|
| C | 3.551931  | 0.382067  | 1.087423  |
| C | 2.883823  | -0.345945 | 0.087280  |
| C | 3.596612  | -1.154663 | -0.794568 |
| C | 4.994372  | -1.242013 | -0.683830 |
| C | 5.672293  | -0.520594 | 0.297053  |
| C | 4.939488  | 0.289136  | 1.183183  |
| C | 1.395663  | -0.259774 | 0.003431  |
| C | 0.660708  | -1.441233 | 0.127633  |
| C | -0.741123 | -1.420619 | 0.027451  |
| C | -1.438290 | -0.208815 | 0.073304  |
| C | -0.700909 | 1.009441  | 0.138185  |
| C | 0.699267  | 0.977316  | -0.133569 |
| C | 1.335458  | 2.220712  | -0.608772 |
| C | 0.674460  | 3.465643  | -0.430838 |
| C | -0.590550 | 3.507180  | 0.303180  |
| C | -1.295195 | 2.297497  | 0.543219  |



|   |           |           |           |
|---|-----------|-----------|-----------|
| C | -1.121102 | 4.721310  | 0.792206  |
| C | -2.309969 | 4.760977  | 1.503425  |
| C | -2.992490 | 3.565813  | 1.769651  |
| C | -2.486181 | 2.361971  | 1.305167  |
| C | 1.245828  | 4.633150  | -0.983048 |
| C | 2.431699  | 4.593335  | -1.699291 |
| C | 3.069673  | 3.362337  | -1.905386 |
| C | 2.523961  | 2.202956  | -1.376525 |
| C | -1.483237 | -2.724337 | -0.063726 |
| O | -2.141535 | -2.830649 | -1.229500 |
| C | -2.998346 | -3.979759 | -1.364366 |
| C | -2.928662 | -0.252976 | -0.008651 |
| C | -3.576890 | 0.429925  | -1.043704 |
| C | -4.972240 | 0.352415  | -1.145534 |
| C | -5.711100 | -0.407444 | -0.233298 |
| C | -5.053302 | -1.090655 | 0.791744  |
| C | -3.658383 | -1.009975 | 0.917960  |
| O | -5.704110 | 0.981824  | -2.112063 |
| C | -5.022164 | 1.807358  | -3.050437 |
| O | -5.852047 | -1.816028 | 1.629404  |
| C | -5.237255 | -2.557586 | 2.680442  |
| C | 1.354861  | -2.744535 | 0.410105  |
| O | 1.198080  | -3.616302 | -0.608764 |
| C | 1.711828  | -4.942305 | -0.371820 |
| O | 5.603172  | -2.061865 | -1.592561 |

|   |           |           |           |
|---|-----------|-----------|-----------|
| C | 7.017850  | -2.201386 | -1.540158 |
| O | 5.693166  | 0.948989  | 2.112055  |
| C | 5.028149  | 1.790984  | 3.048223  |
| O | -1.485878 | -3.578734 | 0.802241  |
| O | 1.958704  | -2.989318 | 1.430712  |
| H | -2.424889 | -4.902629 | -1.242121 |
| H | -3.418409 | -3.910131 | -2.367871 |
| H | -3.792168 | -3.937781 | -0.612305 |
| H | -3.010465 | 1.453101  | 1.562919  |
| H | -3.906291 | 3.572108  | 2.357919  |
| H | -2.691041 | 5.708991  | 1.874250  |
| H | -0.575150 | 5.645969  | 0.640247  |
| H | -2.985346 | 1.004681  | -1.744911 |
| H | -6.790261 | -0.467053 | -0.323460 |
| H | -3.134842 | -1.515387 | 1.719350  |
| H | -4.489995 | 2.626148  | -2.548479 |
| H | -5.797787 | 2.219346  | -3.698523 |
| H | -4.313450 | 1.224709  | -3.654016 |
| H | -4.522009 | -3.292407 | 2.288693  |
| H | -6.052134 | -3.074538 | 3.190227  |
| H | -4.725921 | -1.893652 | 3.390074  |
| H | 2.786811  | -4.901445 | -0.175665 |
| H | 1.504755  | -5.499841 | -1.285827 |
| H | 1.198044  | -5.389493 | 0.483836  |
| H | 3.013540  | 1.263559  | -1.588822 |

|   |          |           |           |
|---|----------|-----------|-----------|
| H | 3.979811 | 3.305218  | -2.496604 |
| H | 2.844333 | 5.506787  | -2.119825 |
| H | 0.733812 | 5.583364  | -0.877785 |
| H | 3.095967 | -1.714212 | -1.577946 |
| H | 6.747860 | -0.559713 | 0.416499  |
| H | 2.973282 | 0.999021  | 1.762839  |
| H | 7.520287 | -1.238950 | -1.707077 |
| H | 7.277593 | -2.891469 | -2.345021 |
| H | 7.341840 | -2.621433 | -0.578460 |
| H | 4.492740 | 2.604875  | 2.541626  |
| H | 5.814390 | 2.208831  | 3.679573  |
| H | 4.325459 | 1.218637  | 3.668015  |

7

E(hartree)= -2068.077525

NImag= 0

|   |          |           |           |
|---|----------|-----------|-----------|
| C | 3.433763 | -1.556881 | -0.619517 |
| C | 2.824953 | -0.355887 | -0.194403 |
| C | 3.583323 | 0.820299  | 0.021363  |
| C | 5.004185 | 0.702347  | -0.128516 |
| C | 5.599625 | -0.500150 | -0.485035 |
| C | 4.810160 | -1.630070 | -0.748685 |
| C | 2.874634 | 2.079812  | 0.276043  |
| C | 1.475012 | 2.147565  | -0.023407 |
| C | 0.704466 | 0.933314  | -0.199880 |
| C | 1.368383 | -0.310969 | -0.047308 |

|   |           |           |           |
|---|-----------|-----------|-----------|
| C | 0.794860  | 3.395989  | 0.018722  |
| C | 1.466177  | 4.523770  | 0.514488  |
| C | 2.791371  | 4.430221  | 0.921370  |
| C | 3.495785  | 3.236734  | 0.781047  |
| C | -0.714734 | 0.984293  | -0.356675 |
| C | -1.310864 | 2.278574  | -0.727196 |
| C | -0.575234 | 3.470554  | -0.492442 |
| C | -2.564620 | 2.383249  | -1.373349 |
| C | -3.110627 | 3.611678  | -1.710974 |
| C | -2.409241 | 4.790736  | -1.421576 |
| C | -1.155465 | 4.712168  | -0.836220 |
| C | 0.596768  | -1.461566 | 0.207188  |
| C | -0.798745 | -1.396843 | 0.148393  |
| C | -1.469491 | -0.198507 | -0.144059 |
| C | -2.961743 | -0.200188 | -0.018988 |
| C | -3.542527 | 0.503230  | 1.042725  |
| C | -4.936925 | 0.509430  | 1.180276  |
| C | -5.741759 | -0.185671 | 0.273153  |
| C | -5.150511 | -0.896637 | -0.772627 |
| C | -3.756554 | -0.907134 | -0.929513 |
| C | -1.582358 | -2.616880 | 0.560337  |
| O | -2.003752 | -3.327144 | -0.499008 |
| C | -2.730282 | -4.531567 | -0.186161 |
| O | -5.605072 | 1.168514  | 2.172409  |
| C | -4.848663 | 1.915785  | 3.119501  |

|   |           |           |           |
|---|-----------|-----------|-----------|
| O | -6.015941 | -1.556607 | -1.602018 |
| C | -5.478253 | -2.304032 | -2.686454 |
| C | 1.195579  | -2.737806 | 0.724484  |
| O | 1.907594  | -2.515375 | 1.842711  |
| C | 2.530279  | -3.670516 | 2.432694  |
| O | 5.750903  | 1.829140  | 0.061903  |
| C | 7.151102  | 1.796793  | -0.187458 |
| O | 5.496213  | -2.741384 | -1.144142 |
| C | 4.753259  | -3.915619 | -1.464379 |
| O | -1.785233 | -2.928174 | 1.715815  |
| O | 1.022849  | -3.842285 | 0.241020  |
| H | -0.594448 | 5.627635  | -0.683716 |
| H | -2.825920 | 5.759334  | -1.685739 |
| H | -4.074448 | 3.652261  | -2.211476 |
| H | -3.111786 | 1.488440  | -1.632994 |
| H | -2.971988 | -4.981108 | -1.150018 |
| H | -2.102779 | -5.202297 | 0.406754  |
| H | -3.639998 | -4.289626 | 0.371273  |
| H | -2.900305 | 1.039452  | 1.729899  |
| H | -6.820284 | -0.179552 | 0.387115  |
| H | -3.280063 | -1.448369 | -1.735288 |
| H | -5.580694 | 2.356076  | 3.798977  |
| H | -4.167131 | 1.267783  | 3.686251  |
| H | -4.275245 | 2.714650  | 2.630782  |
| H | -6.336719 | -2.749641 | -3.192439 |

|   |           |           |           |
|---|-----------|-----------|-----------|
| H | -4.935398 | -1.657188 | -3.388886 |
| H | -4.808181 | -3.098816 | -2.332433 |
| H | 0.946594  | 5.470309  | 0.615552  |
| H | 3.291293  | 5.299677  | 1.340816  |
| H | 4.531987  | 3.200263  | 1.077911  |
| H | 3.019220  | -3.303904 | 3.335451  |
| H | 1.778251  | -4.426354 | 2.674199  |
| H | 3.266548  | -4.094471 | 1.742510  |
| H | 6.670399  | -0.594679 | -0.608747 |
| H | 2.818471  | -2.400688 | -0.894844 |
| H | 7.501160  | 2.815612  | -0.010810 |
| H | 7.664302  | 1.110395  | 0.498538  |
| H | 7.363842  | 1.510349  | -1.225486 |
| H | 5.495439  | -4.669740 | -1.731458 |
| H | 4.164012  | -4.265181 | -0.607013 |
| H | 4.082838  | -3.741818 | -2.315995 |

**8**

E(hartree)= -2066.891591

NImag= 0

|   |           |          |          |
|---|-----------|----------|----------|
| C | 1.508666  | 2.220123 | 0.218660 |
| C | 0.762900  | 0.991604 | 0.118094 |
| C | -0.665885 | 1.017221 | 0.083887 |
| C | -1.388576 | 2.264665 | 0.084284 |
| C | -0.663060 | 3.475669 | 0.271822 |
| C | 0.800189  | 3.445297 | 0.391355 |

|   |           |           |           |
|---|-----------|-----------|-----------|
| C | -1.387782 | -0.190889 | 0.127725  |
| C | -0.687103 | -1.369711 | 0.500842  |
| C | 0.704983  | -1.414852 | 0.433468  |
| C | 1.449788  | -0.247591 | 0.110022  |
| C | 2.941779  | 2.189839  | 0.273034  |
| C | 3.633518  | 0.944307  | -0.075233 |
| C | 2.883207  | -0.257585 | -0.188705 |
| C | -2.799538 | -0.202917 | -0.238952 |
| C | -3.524439 | 1.015694  | -0.296107 |
| C | -2.821212 | 2.273809  | -0.014700 |
| C | -3.479056 | 3.507607  | 0.147308  |
| C | -2.764066 | 4.686777  | 0.332062  |
| C | -1.377083 | 4.680008  | 0.375044  |
| C | -3.386660 | -1.430160 | -0.625975 |
| C | -4.719502 | -1.482459 | -0.987956 |
| C | -5.482140 | -0.304809 | -1.013023 |
| C | -4.899902 | 0.915365  | -0.699546 |
| C | 5.027940  | 0.862151  | -0.407479 |
| C | 5.609334  | -0.324809 | -0.827903 |
| C | 4.827401  | -1.478276 | -0.974411 |
| C | 3.477891  | -1.445998 | -0.669590 |
| C | 1.528161  | 4.603498  | 0.706492  |
| C | 2.907532  | 4.555976  | 0.853788  |
| C | 3.609105  | 3.374933  | 0.634138  |
| O | -5.620544 | 2.071878  | -0.788074 |

|   |           |           |           |
|---|-----------|-----------|-----------|
| C | -6.956399 | 2.038352  | -1.275394 |
| O | -5.381759 | -2.616449 | -1.359521 |
| C | -4.661246 | -3.847032 | -1.359445 |
| C | -1.416365 | -2.503900 | 1.165105  |
| O | -2.216525 | -2.033557 | 2.141563  |
| C | -3.012787 | -3.013756 | 2.829444  |
| C | 1.355013  | -2.676264 | 0.953400  |
| O | 1.409299  | -3.653533 | 0.027290  |
| C | 1.765279  | -4.958346 | 0.521609  |
| O | 5.491517  | -2.571172 | -1.452872 |
| C | 4.769819  | -3.790671 | -1.589881 |
| O | 5.766956  | 2.007598  | -0.327022 |
| C | 7.126655  | 2.003153  | -0.743590 |
| O | -1.295373 | -3.691199 | 0.919565  |
| O | 1.722559  | -2.809205 | 2.101190  |
| H | -0.858357 | 5.622195  | 0.502916  |
| H | -3.302315 | 5.625027  | 0.441726  |
| H | -4.555121 | 3.548731  | 0.124767  |
| H | -6.517075 | -0.383261 | -1.318381 |
| H | -2.776014 | -2.318162 | -0.691536 |
| H | 2.863292  | -2.308463 | -0.865472 |
| H | 6.657903  | -0.390518 | -1.085907 |
| H | 4.680439  | 3.375321  | 0.747021  |
| H | 3.450191  | 5.453950  | 1.138753  |
| H | 1.022704  | 5.546462  | 0.874888  |



|   |           |           |           |
|---|-----------|-----------|-----------|
| H | -6.999297 | 1.627996  | -2.292480 |
| H | -7.286596 | 3.078886  | -1.287694 |
| H | -7.610107 | 1.456045  | -0.613102 |
| H | -3.839647 | -3.827299 | -2.087166 |
| H | -5.384709 | -4.612098 | -1.646221 |
| H | -4.256424 | -4.074429 | -0.364833 |
| H | 4.366827  | -4.120714 | -0.624427 |
| H | 5.491915  | -4.522275 | -1.956825 |
| H | 3.948379  | -3.691238 | -2.311555 |
| H | 7.735320  | 1.336990  | -0.118485 |
| H | 7.470958  | 3.031771  | -0.619720 |
| H | 7.219753  | 1.709815  | -1.797267 |
| H | -3.701970 | -3.495531 | 2.128424  |
| H | -3.564631 | -2.455720 | 3.586157  |
| H | -2.373784 | -3.771442 | 3.291023  |
| H | 2.731658  | -4.929428 | 1.033005  |
| H | 1.807529  | -5.599494 | -0.359576 |
| H | 0.991995  | -5.304159 | 1.212853  |

## 6planar

E(hartree)= -2069.246107

NImag= 3

|   |           |          |           |
|---|-----------|----------|-----------|
| C | -1.441952 | 2.560222 | 0.038720  |
| C | -0.710640 | 3.780274 | -0.014255 |
| C | 0.749996  | 3.765220 | -0.035066 |
| C | 1.458783  | 2.530790 | -0.002627 |

|   |           |           |           |
|---|-----------|-----------|-----------|
| C | 0.719620  | 1.241288  | 0.052869  |
| C | -0.727217 | 1.256980  | 0.073457  |
| C | -1.429693 | 0.007447  | 0.127032  |
| C | -0.726686 | -1.196286 | 0.158491  |
| C | 0.669989  | -1.212548 | 0.138656  |
| C | 1.396511  | -0.023608 | 0.086830  |
| C | 1.474791  | 4.980960  | -0.087796 |
| C | 2.855663  | 5.023194  | -0.109428 |
| C | 3.562549  | 3.818010  | -0.077975 |
| C | 2.875620  | 2.617217  | -0.026317 |
| C | -2.857223 | 2.674689  | 0.055423  |
| C | -3.522085 | 3.888479  | 0.023058  |
| C | -2.792476 | 5.079577  | -0.028888 |
| C | -1.412708 | 5.010144  | -0.046634 |
| C | 2.878779  | -0.258921 | 0.009994  |
| C | 3.639635  | -0.323784 | 1.189671  |
| C | 4.996755  | -0.626375 | 1.101982  |
| C | 5.606437  | -0.859592 | -0.144988 |
| C | 4.831476  | -0.812077 | -1.301851 |
| C | 3.457375  | -0.520582 | -1.227076 |
| O | 5.313734  | -1.039670 | -2.560051 |
| C | 6.692953  | -1.351782 | -2.712377 |
| O | 5.833559  | -0.730551 | 2.176325  |
| C | 5.279500  | -0.579091 | 3.480211  |
| C | 1.364782  | -2.544495 | 0.256633  |

|   |           |           |           |
|---|-----------|-----------|-----------|
| O | 2.072427  | -2.888683 | 1.177372  |
| C | -1.449333 | -2.515467 | 0.265327  |
| O | -1.422909 | -3.213464 | 1.260571  |
| C | -2.917417 | -0.201754 | 0.082453  |
| C | -3.573188 | -0.212929 | -1.155057 |
| C | -4.938497 | -0.515624 | -1.198958 |
| C | -5.637798 | -0.817802 | -0.025138 |
| C | -4.967324 | -0.828954 | 1.198852  |
| C | -3.597446 | -0.520777 | 1.261019  |
| O | -5.678579 | -0.556096 | -2.347633 |
| C | -5.038037 | -0.237359 | -3.578358 |
| O | -5.725350 | -1.158199 | 2.285352  |
| C | -5.091282 | -1.234767 | 3.559437  |
| O | -2.093138 | -2.842962 | -0.864889 |
| C | -2.875365 | -4.051031 | -0.812215 |
| O | 1.049547  | -3.341952 | -0.787523 |
| C | 1.558023  | -4.688140 | -0.713164 |
| H | -2.235765 | -4.910182 | -0.590667 |
| H | -3.325611 | -4.145448 | -1.800654 |
| H | -3.648294 | -3.962308 | -0.043571 |
| H | -3.475032 | 1.800359  | 0.094755  |
| H | -4.608801 | 3.899245  | 0.038557  |
| H | -3.292510 | 6.044306  | -0.055027 |
| H | -0.867622 | 5.943385  | -0.086946 |
| H | -3.007155 | 0.008486  | -2.050809 |

|   |           |           |           |
|---|-----------|-----------|-----------|
| H | -6.694922 | -1.056512 | -0.068673 |
| H | -3.053358 | -0.530338 | 2.197116  |
| H | -4.640704 | 0.786367  | -3.568530 |
| H | -5.812018 | -0.320054 | -4.343574 |
| H | -4.226183 | -0.942488 | -3.801452 |
| H | -4.289548 | -1.984396 | 3.561315  |
| H | -5.873725 | -1.534223 | 4.258935  |
| H | -4.685159 | -0.260358 | 3.861740  |
| H | 2.650454  | -4.678495 | -0.664832 |
| H | 1.214412  | -5.176744 | -1.625557 |
| H | 1.158322  | -5.188388 | 0.173856  |
| H | 3.476678  | 1.730955  | -0.004374 |
| H | 4.649242  | 3.807304  | -0.093476 |
| H | 3.373595  | 5.977939  | -0.150089 |
| H | 0.947447  | 5.924879  | -0.112814 |
| H | 2.872929  | -0.486239 | -2.140570 |
| H | 6.664538  | -1.090107 | -0.156962 |
| H | 3.150151  | -0.158118 | 2.140148  |
| H | 7.329826  | -0.531749 | -2.353984 |
| H | 6.848626  | -1.491376 | -3.783705 |
| H | 6.953958  | -2.276699 | -2.180414 |
| H | 4.865741  | 0.428317  | 3.622105  |
| H | 6.109629  | -0.731495 | 4.172378  |
| H | 4.499299  | -1.327699 | 3.667900  |

## 7planar

E(hartree)= -2068.061736

NImag= 4

|   |           |           |           |
|---|-----------|-----------|-----------|
| C | -0.841846 | -1.198888 | -0.088027 |
| C | -1.436050 | 0.063040  | -0.013136 |
| C | -0.613422 | 1.219441  | 0.030391  |
| C | 0.823594  | 1.040786  | -0.005051 |
| C | 1.412765  | -0.268645 | -0.082257 |
| C | 0.539834  | -1.379810 | -0.122567 |
| C | 0.879964  | -2.843002 | 0.021127  |
| O | 0.817537  | -3.668222 | -0.870363 |
| C | -2.936853 | 0.005165  | 0.011484  |
| C | -3.588456 | -0.239345 | 1.223898  |
| C | -4.986309 | -0.374576 | 1.233530  |
| C | -5.714087 | -0.269519 | 0.046647  |
| C | -5.046127 | -0.047996 | -1.162076 |
| C | -3.652540 | 0.084728  | -1.189748 |
| C | 1.705077  | 2.197482  | 0.037411  |
| C | 1.148965  | 3.511855  | 0.114261  |
| C | -0.299281 | 3.704807  | 0.150634  |
| C | -1.174245 | 2.587781  | 0.110064  |
| C | 3.136891  | 2.045694  | 0.003427  |
| C | 3.735007  | 0.709178  | -0.075317 |
| C | 2.883476  | -0.429823 | -0.117431 |
| C | 3.929331  | 3.210371  | 0.047928  |

|   |           |           |           |
|---|-----------|-----------|-----------|
| C | 3.371298  | 4.476989  | 0.122393  |
| C | 1.998786  | 4.628525  | 0.155275  |
| C | -2.566616 | 2.863681  | 0.149616  |
| C | -3.079350 | 4.146839  | 0.224087  |
| C | -2.209121 | 5.240912  | 0.263580  |
| C | -0.847600 | 5.009333  | 0.226842  |
| C | 3.449870  | -1.723866 | -0.193439 |
| C | 4.814577  | -1.923397 | -0.228612 |
| C | 5.676448  | -0.825539 | -0.188773 |
| C | 5.157458  | 0.454977  | -0.114321 |
| O | -5.844252 | 0.013855  | -2.270340 |
| C | -5.233166 | 0.253324  | -3.533540 |
| O | -5.722350 | -0.615451 | 2.357921  |
| C | -5.036663 | -0.785814 | 3.595208  |
| C | -1.727420 | -2.425170 | -0.097631 |
| O | -1.913790 | -3.143545 | 0.865986  |
| O | 5.423386  | -3.141547 | -0.313467 |
| C | 4.606976  | -4.308811 | -0.346811 |
| O | 6.015403  | 1.518448  | -0.077038 |
| C | 7.421208  | 1.308817  | -0.117434 |
| O | 1.109689  | -3.147926 | 1.311490  |
| C | 1.115896  | -4.551978 | 1.636099  |
| O | -2.261454 | -2.637787 | -1.307543 |
| C | -3.147805 | -3.769837 | -1.411987 |
| H | -0.195615 | 5.871556  | 0.258587  |

|   |           |           |           |
|---|-----------|-----------|-----------|
| H | -2.588834 | 6.257721  | 0.322105  |
| H | -4.156549 | 4.288813  | 0.251062  |
| H | -3.282123 | 2.066088  | 0.122314  |
| H | -3.486378 | -3.774295 | -2.448246 |
| H | -2.609113 | -4.691390 | -1.175235 |
| H | -3.992542 | -3.648821 | -0.728139 |
| H | -3.001262 | -0.324815 | 2.129420  |
| H | -6.793526 | -0.374613 | 0.059520  |
| H | -3.111995 | 0.247406  | -2.113217 |
| H | -5.812459 | -0.991715 | 4.334836  |
| H | -4.337731 | -1.630985 | 3.549890  |
| H | -4.494331 | 0.125798  | 3.879486  |
| H | -6.049485 | 0.266676  | -4.258029 |
| H | -4.713952 | 1.220881  | -3.549322 |
| H | -4.525728 | -0.545194 | -3.794133 |
| H | 1.597736  | 5.630784  | 0.213454  |
| H | 4.019358  | 5.349271  | 0.154720  |
| H | 4.999055  | 3.129266  | 0.024176  |
| H | 1.378140  | -4.601034 | 2.693175  |
| H | 0.117320  | -4.963200 | 1.464425  |
| H | 1.846761  | -5.090472 | 1.027158  |
| H | 6.740486  | -1.015129 | -0.217921 |
| H | 2.835680  | -2.597697 | -0.226467 |
| H | 7.861986  | 2.306940  | -0.077227 |
| H | 7.763808  | 0.723543  | 0.745505  |

|   |          |           |           |
|---|----------|-----------|-----------|
| H | 7.725539 | 0.812589  | -1.047835 |
| H | 5.297009 | -5.148307 | -0.447347 |
| H | 4.036534 | -4.413783 | 0.584880  |
| H | 3.916071 | -4.294734 | -1.199206 |

## 8planar

E(hartree)= -2066.875174

NImag= 5

|   |           |           |           |
|---|-----------|-----------|-----------|
| C | 0.724039  | 1.039121  | 0.011904  |
| C | 1.452348  | 2.292501  | 0.023732  |
| C | 0.730372  | 3.521324  | 0.011924  |
| C | -0.730350 | 3.521309  | -0.011882 |
| C | -1.452343 | 2.292483  | -0.023607 |
| C | -0.724084 | 1.039076  | -0.011696 |
| C | 1.458516  | -0.182871 | 0.023916  |
| C | 0.698261  | -1.379026 | 0.011566  |
| C | -0.698321 | -1.379087 | -0.011195 |
| C | -1.458593 | -0.182911 | -0.023625 |
| C | 2.938373  | -0.171930 | 0.048033  |
| C | 3.646008  | 1.064659  | 0.059524  |
| C | 2.890983  | 2.319875  | 0.047176  |
| C | 3.528687  | 3.576538  | 0.057527  |
| C | 2.810540  | 4.762360  | 0.045783  |
| C | 1.429504  | 4.738960  | 0.023277  |
| C | -2.891010 | 2.319870  | -0.047054 |
| C | -3.528672 | 3.576557  | -0.057489 |



|   |           |           |           |
|---|-----------|-----------|-----------|
| C | -2.810500 | 4.762363  | -0.045824 |
| C | -1.429466 | 4.738946  | -0.023316 |
| C | -3.646039 | 1.064652  | -0.059317 |
| C | -2.938429 | -0.171963 | -0.047743 |
| C | 5.088682  | 0.988664  | 0.083038  |
| C | 5.764450  | -0.218362 | 0.094092  |
| C | 5.044798  | -1.414408 | 0.082404  |
| C | 3.665312  | -1.386391 | 0.059921  |
| C | -5.088719 | 0.988661  | -0.082826 |
| C | -5.764476 | -0.218360 | -0.093798 |
| C | -5.044824 | -1.414409 | -0.082029 |
| C | -3.665328 | -1.386423 | -0.059548 |
| C | 1.251306  | -2.776568 | -0.169968 |
| O | 1.452677  | -3.027179 | -1.474808 |
| C | 1.674557  | -4.406744 | -1.827981 |
| C | -1.251276 | -2.776721 | 0.170024  |
| O | -1.452555 | -3.027623 | 1.474814  |
| C | -1.674334 | -4.407237 | 1.827827  |
| O | 5.802014  | -2.549934 | 0.109823  |
| C | 5.138670  | -3.810100 | 0.086597  |
| O | 5.805527  | 2.152196  | 0.095904  |
| C | 7.226507  | 2.120334  | 0.128006  |
| O | -5.805542 | 2.152202  | -0.096342 |
| C | -7.226526 | 2.120431  | -0.128343 |
| O | -5.802064 | -2.549903 | -0.109550 |

|   |           |           |           |
|---|-----------|-----------|-----------|
| C | -5.138704 | -3.810075 | -0.087372 |
| O | -1.387106 | -3.609206 | -0.708216 |
| O | 1.387007  | -3.609301 | 0.708059  |
| H | -0.904757 | 5.683973  | -0.014797 |
| H | -3.340642 | 5.711518  | -0.054496 |
| H | -4.600009 | 3.633203  | -0.074950 |
| H | -6.844015 | -0.275648 | -0.114733 |
| H | -3.170434 | -2.332489 | -0.051451 |
| H | 3.170433  | -2.332466 | 0.051888  |
| H | 6.844051  | -0.275639 | 0.111688  |
| H | 4.600030  | 3.633137  | 0.074985  |
| H | 3.340693  | 5.711509  | 0.054391  |
| H | 0.904806  | 5.683993  | 0.014694  |
| H | -7.595778 | 1.621981  | -1.033763 |
| H | -7.537211 | 3.167130  | -0.137737 |
| H | -7.636717 | 1.626074  | 0.761618  |
| H | -4.447413 | -3.918424 | -0.932661 |
| H | -5.928019 | -4.560433 | -0.158774 |
| H | -4.589893 | -3.945460 | 0.853385  |
| H | 4.446370  | -3.918762 | 0.931019  |
| H | 5.927885  | -4.560479 | 0.158921  |
| H | 4.591045  | -3.945191 | -0.854911 |
| H | 7.595573  | 1.622269  | 1.033715  |
| H | 7.537279  | 3.167012  | 0.136798  |
| H | 7.636796  | 1.625528  | -0.761660 |

|   |           |           |           |
|---|-----------|-----------|-----------|
| H | -2.511874 | -4.824985 | 1.263736  |
| H | -1.889541 | -4.399266 | 2.896459  |
| H | -0.765553 | -4.977993 | 1.617855  |
| H | 1.888982  | -4.398698 | -2.896770 |
| H | 0.766099  | -4.977768 | -1.617357 |
| H | 2.512639  | -4.824236 | -1.264499 |

### 8twisted

E(hartree)= -2066.892713

NImag= 0

|   |           |           |           |
|---|-----------|-----------|-----------|
| C | -3.404658 | 3.414609  | 0.969022  |
| C | -2.830706 | 2.208339  | 0.520244  |
| C | -1.428098 | 2.217632  | 0.220969  |
| C | -0.699360 | 3.437719  | 0.213352  |
| C | -1.330995 | 4.616778  | 0.634322  |
| C | -2.659963 | 4.589605  | 1.037452  |
| C | 0.700092  | 3.437460  | -0.215464 |
| C | 1.428633  | 2.217264  | -0.222082 |
| C | 0.714596  | 0.979333  | -0.025389 |
| C | -0.714363 | 0.979490  | 0.024502  |
| C | -3.592107 | 0.979684  | 0.260512  |
| C | -2.892305 | -0.188250 | -0.148271 |
| C | -1.432073 | -0.236891 | -0.019421 |
| C | -0.698214 | -1.448306 | 0.008371  |
| C | 0.697907  | -1.448449 | -0.009683 |
| C | 1.432024  | -0.237211 | 0.018527  |

|   |           |           |           |
|---|-----------|-----------|-----------|
| C | 2.892202  | -0.188872 | 0.148126  |
| C | 3.592444  | 0.979035  | -0.259949 |
| C | 2.831326  | 2.207590  | -0.520909 |
| C | 3.405492  | 3.413332  | -0.970782 |
| C | 2.660931  | 4.588350  | -1.040434 |
| C | 1.331949  | 4.616073  | -0.637367 |
| C | -3.576403 | -1.280692 | -0.725570 |
| C | -4.958774 | -1.292875 | -0.780222 |
| C | -5.687843 | -0.218819 | -0.250587 |
| C | -5.026062 | 0.895168  | 0.246512  |
| C | 5.026376  | 0.894729  | -0.244068 |
| C | 5.687659  | -0.219411 | 0.253361  |
| C | 4.958057  | -1.293744 | 0.781688  |
| C | 3.575733  | -1.281503 | 0.725738  |
| O | 5.704750  | -2.295521 | 1.330598  |
| C | 5.022239  | -3.379441 | 1.958409  |
| O | 5.727976  | 1.964855  | -0.720405 |
| C | 7.148923  | 1.965108  | -0.656336 |
| O | -5.727195 | 1.964874  | 0.724482  |
| C | -7.148259 | 1.964656  | 0.662964  |
| O | -5.706017 | -2.294398 | -1.328844 |
| C | -5.024134 | -3.377941 | -1.957993 |
| C | 1.359079  | -2.794320 | -0.149192 |
| C | -1.359580 | -2.794141 | 0.147394  |
| H | 0.774441  | 5.544611  | -0.697289 |

|   |           |           |           |
|---|-----------|-----------|-----------|
| H | 3.133712  | 5.495917  | -1.407768 |
| H | 4.440964  | 3.435498  | -1.265350 |
| H | 6.767391  | -0.276458 | 0.289667  |
| H | 3.016989  | -2.083042 | 1.180472  |
| H | -3.018088 | -2.082120 | -1.181018 |
| H | -6.767612 | -0.275959 | -0.285599 |
| H | -4.440102 | 3.437211  | 1.263620  |
| H | -3.132629 | 5.497587  | 1.403911  |
| H | -0.773344 | 5.545281  | 0.693424  |
| H | 7.501614  | 1.878310  | 0.379407  |
| H | 7.457842  | 2.928141  | -1.067505 |
| H | 7.576291  | 1.155912  | -1.262509 |
| H | 4.411148  | -3.027799 | 2.799672  |
| H | 5.804217  | -4.046037 | 2.325937  |
| H | 4.380777  | -3.917857 | 1.249897  |
| H | -4.413931 | -3.025784 | -2.799686 |
| H | -5.806482 | -4.044339 | -2.325092 |
| H | -4.381917 | -3.916764 | -1.250477 |
| H | -7.502795 | 1.878476  | -0.372200 |
| H | -7.456783 | 2.927283  | 1.075379  |
| H | -7.574232 | 1.154869  | 1.269327  |
| O | 1.334455  | -3.680634 | 0.685116  |
| O | 1.948820  | -2.908964 | -1.349062 |
| C | 2.572934  | -4.176966 | -1.623774 |
| H | 2.951593  | -4.096113 | -2.642857 |

|   |           |           |           |
|---|-----------|-----------|-----------|
| H | 3.393835  | -4.354628 | -0.922479 |
| H | 1.838552  | -4.982448 | -1.540260 |
| O | -1.335608 | -3.679880 | -0.687554 |
| O | -1.948600 | -2.909492 | 1.347528  |
| C | -2.572586 | -4.177643 | 1.621852  |
| H | -2.950659 | -4.097382 | 2.641198  |
| H | -3.393885 | -4.354889 | 0.920920  |
| H | -1.838250 | -4.983074 | 1.537439  |

## Thermal properties

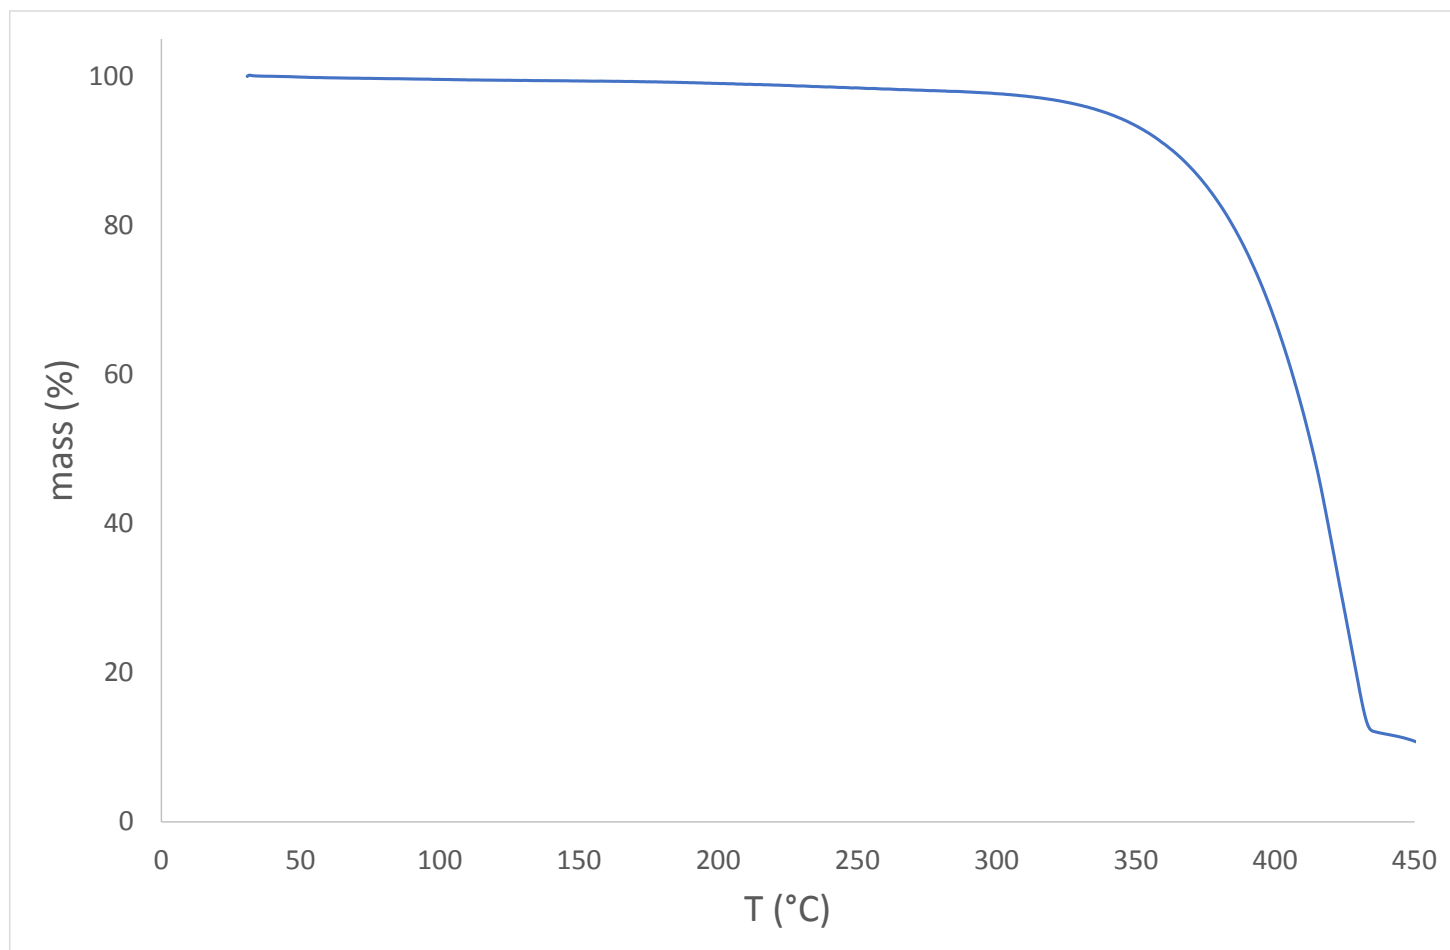

**Figure S40:** Thermogravimetric analyses (TGA) measurements performed on **1**. (TGA performed by using a Mettler-Toledo TGA-DSC-1 apparatus under dry nitrogen flow at a heating rate of 10 °C/min.)
